# Supplementary material
Source: publisher site journal article supplement (https://www.dovepress.com/article/551402)
Supplement: Supplementary file 1 [file 551402_Supplementary%20Materials_2.pdf]

**Table S1. Guidelines for the Clinical Application of Novel Anti-cancer Drugs (2023 Edition)****Table of Contents**

| <b>Tumor drug directory of each system</b> |                  |
|--------------------------------------------|------------------|
| <b>Respiratory tumor drugs</b>             |                  |
| <b>No.</b>                                 | <b>Drug Name</b> |
| 1                                          | Gefitinib        |
| 2                                          | Erlotinib        |
| 3                                          | Icotinib         |
| 4                                          | Afatinib         |
| 5                                          | Dacomitinib      |
| 6                                          | Osimertinib      |
| 7                                          | Almonertinib     |
| 8                                          | Furmonertinib    |
| 9                                          | Befotertinib     |
| 10                                         | Crizotinib       |
| 11                                         | Alectinib        |
| 12                                         | Ceritinib        |
| 13                                         | Ensartinib       |
| 14                                         | Brigatinib       |
| 15                                         | Lorlatinib       |
| 16                                         | Iruplinkib       |
| 17                                         | Bevacizumab      |
| 18                                         | Endostatin       |
| 19                                         | Anlotinib        |
| 20                                         | Everolimus       |
| 21                                         | Pralsetinib      |
| 22                                         | Selpercatinib    |
| 23                                         | Savolitinib      |
| 24                                         | Glumetinib       |
| 25                                         | Dabrafenib       |
| 26                                         | Trametinib       |
| 27                                         | Entrectinib      |
| 28                                         | Mobocertinib     |
| 29                                         | Nivolumab        |
| 30                                         | Pembrolizumab    |
| 31                                         | Durvalumab       |
| 32                                         | Atezolizumab     |
| 33                                         | Camrelizumab     |
| 34                                         | Tislelizumab     |
| 35                                         | Sintilimab       |
| 36                                         | Ipilimumab       |
| 37                                         | Sugemalimab      |

|    |             |
|----|-------------|
| 38 | Toripalimab |
| 39 | Serplulimab |
| 40 | Penpulimab  |
| 41 | Adebrelimab |

---

**Drugs for digestive system tumors**

---

| No. | Drug Name         |
|-----|-------------------|
| 1   | Sorafenib         |
| 2   | Regorafenib       |
| 3   | Lenvatinib        |
| 4   | Donafenib         |
| 5   | Atezolizumab      |
| 6   | Sintilimab        |
| 7   | Camrelizumab      |
| 8   | Tislelizumab      |
| 9   | Pembrolizumab     |
| 10  | Toripalimab       |
| 11  | Trastuzumab       |
| 12  | Apatinib          |
| 13  | Nivolumab         |
| 14  | Disitamab Vedotin |
| 15  | Ramucirumab       |
| 16  | Imatinib          |
| 17  | Sunitinib         |
| 18  | Avapritinib       |
| 19  | Ripretinib        |
| 20  | Everolimus        |
| 21  | Surufatinib       |
| 22  | Bevacizumab       |
| 23  | Cetuximab         |
| 24  | Fruquintinib      |
| 25  | Envafolimab       |
| 26  | Serplulimab       |
| 27  | Pucotenlimab      |
| 28  | Pemigatinib       |
| 29  | Nimotuzumab       |

---

**Hematologic tumor drugs**

---

| No. | Drug Name      |
|-----|----------------|
| 1   | Imatinib       |
| 2   | Dasatinib      |
| 3   | Nilotinib      |
| 4   | Olverembatinib |
| 5   | Flumatinib     |
| 6   | Ibrutinib      |

|    |                          |
|----|--------------------------|
| 7  | Zanubrutinib             |
| 8  | Orelabrutinib            |
| 9  | Bortezomib               |
| 10 | Carfilzomib              |
| 11 | Ixazomib                 |
| 12 | Thalidomide              |
| 13 | Lenalidomide             |
| 14 | Pomalidomide             |
| 15 | Daratumumab              |
| 16 | Selinexor                |
| 17 | Gilteritinib             |
| 18 | Venetoclax               |
| 19 | Ivosidenib               |
| 20 | Blinatumomab             |
| 21 | Sintilimab               |
| 22 | Camrelizumab             |
| 23 | Tislelizumab             |
| 24 | Penpulimab               |
| 25 | Zimberelimab             |
| 26 | Rituximab                |
| 27 | Ripertamab               |
| 28 | Zuberitamab              |
| 29 | Obinutuzumab             |
| 30 | Polatuzumab Vedotin      |
| 31 | Brentuximab Vedotin      |
| 32 | Inotuzumab Ozogamicin    |
| 33 | Chidamide                |
| 34 | Linperlisib              |
| 35 | Duvelisib                |
| 36 | Ruxolitinib              |
| 37 | Mogamulizumab            |
| 38 | Siltuximab               |
| 39 | Equecabtagene Autoleucl  |
| 40 | Axicabtagene Ciloleucl   |
| 41 | Relmacabtagene Autoleucl |

---

**Drugs for urinary system tumors**

---

| No. | Drug Name    |
|-----|--------------|
| 1   | Sorafenib    |
| 2   | Sunitinib    |
| 3   | Pazopanib    |
| 4   | Axitinib     |
| 5   | Everolimus   |
| 6   | Tislelizumab |

|    |                   |
|----|-------------------|
| 7  | Toripalimab       |
| 8  | Disitamab Vedotin |
| 9  | Abiraterone       |
| 10 | Apalutamide       |
| 11 | Enzalutamide      |
| 12 | Darolutamide      |
| 13 | Rezvilutamide     |
| 14 | Olaparib          |
| 15 | Lenvatinib        |
| 16 | Nivolumab         |
| 17 | Pembrolizumab     |

---

**Breast cancer drugs**

---

| No. | Drug Name              |
|-----|------------------------|
| 1   | Trastuzumab            |
| 2   | Inetetamab             |
| 3   | Pertuzumab             |
| 4   | Lapatinib              |
| 5   | Pyrotinib              |
| 6   | Neratinib              |
| 7   | Trastuzumab Emtansine  |
| 8   | Trastuzumab Deruxtecan |
| 9   | Palbociclib            |
| 10  | Abemaciclib            |
| 11  | Dalpiciclib            |
| 12  | Ribociclib             |
| 13  | Chidamide              |
| 14  | Everolimus             |
| 15  | Sacituzumab Govitecan  |
| 16  | Pembrolizumab          |

---

**Drugs for skin tumor**

---

| No. | Drug Name     |
|-----|---------------|
| 1   | Vemurafenib   |
| 2   | Dabrafenib    |
| 3   | Trametinib    |
| 4   | Pembrolizumab |
| 5   | Toripalimab   |
| 6   | Pucotenlimab  |
| 7   | Sonidegib     |
| 8   | Imatinib      |

---

**Drugs for bone and soft tissue tumors**

---

| No. | Drug Name  |
|-----|------------|
| 1   | Everolimus |
| 2   | Denosumab  |

3

Anlotinib

**Drugs for head and neck tumors**

| <b>No.</b> | <b>Drug Name</b> |
|------------|------------------|
| 1          | Nimotuzumab      |
| 2          | Toripalimab      |
| 3          | Camrelizumab     |
| 4          | Sorafenib        |
| 5          | Lenvatinib       |
| 6          | Anlotinib        |
| 7          | Nivolumab        |
| 8          | Cetuximab        |
| 9          | Pembrolizumab    |
| 10         | Tislelizumab     |
| 11         | Pralsetinib      |

**Reproductive system tumor drugs**

| <b>No.</b> | <b>Drug Name</b> |
|------------|------------------|
| 1          | Olaparib         |
| 2          | Niraparib        |
| 3          | Fluzoparib       |
| 4          | Pamiparib        |
| 5          | Bevacizumab      |
| 6          | Candonilimab     |

**Drugs for Pansolid tumor**

| <b>No.</b> | <b>Drug Name</b> |
|------------|------------------|
| 1          | Larotrectinib    |
| 2          | Entrectinib      |
| 3          | Envafolimab      |
| 4          | Tislelizumab     |
| 5          | Serplulimab      |
| 6          | Pucotenlimab     |

**Table S2. Information on 311 Indications and Pivotal Clinical Trials of Novel Anti-cancer Drugs Approved by the National Medical Products Administration as of November 30, 2024**

| No. | Drug No. | Generic name  | Indication No. | Year of indication approval | Indication                                                                                                                                                                                  | Single/Multiple Indications | Initial Pivotal Study (first author) | Publication Year | NCT           | Clinical trial phase | Allocation    | Masking      | Arms   |
|-----|----------|---------------|----------------|-----------------------------|---------------------------------------------------------------------------------------------------------------------------------------------------------------------------------------------|-----------------------------|--------------------------------------|------------------|---------------|----------------------|---------------|--------------|--------|
| 1   | 1        | Gefitinib     | 1              | 2004                        | For use in locally advanced or metastatic non-small cell lung cancer (NSCLC) with sensitive mutations in the epidermal growth factor receptor (EGFR) gene                                   | Single                      | Masahiro Fukuoka <sup>1</sup>        | 2011             | NCT00322452   | Phase III            | Randomized    | None         | 2 arms |
| 2   | 2        | Erlotinib     | 1              | 2006                        | Single-agent therapy is suitable for locally advanced or metastatic NSCLC that has progressed after at least one prior chemotherapy regimen                                                 | Multiple                    | Frances A. Shepherd <sup>2</sup>     | 2005             | not available | Phase III            | Randomized    | Double-blind | 2 arms |
| 3   | 2        | Erlotinib     | 2              | 2006                        | Single-agent therapy can be used for maintenance treatment in patients with locally advanced or metastatic NSCLC who are stable after four cycles of first-line platinum-based chemotherapy | Multiple                    | Federico Cappuzzo <sup>3</sup>       | 2010             | NCT00556712   | Phase III            | Randomized    | Double-blind | 2 arms |
| 4   | 2        | Erlotinib     | 3              | 2017                        | First-line treatment for patients with locally advanced or metastatic NSCLC with sensitive mutations in the EGFR gene                                                                       | Multiple                    | Y.-L. Wu <sup>4</sup>                | 2015             | NCT01342965   | Phase III            | Randomized    | None         | 2 arms |
| 5   | 3        | Icotinib      | 1              | 2011                        | First-line treatment for advanced or metastatic NSCLC with sensitive EGFR mutations, or for those previously treated with platinum-based chemotherapy                                       | Multiple                    | Yuankai Shi <sup>5</sup>             | 2013             | NCT01040780   | Phase III            | Randomized    | Double-blind | 2 arms |
| 6   | 3        | Icotinib      | 2              | 2021                        | Single-agent therapy is suitable for adjuvant treatment of stage II-IIIa NSCLC with sensitive EGFR mutations                                                                                | Multiple                    | Jianxing He <sup>6</sup>             | 2021             | NCT02448797   | Phase III            | Randomized    | None         | 2 arms |
| 7   | 4        | Afatinib      | 1              | 2017                        | Advanced NSCLC with sensitive EGFR mutations, untreated with EGFR-TKIs (Tyrosine Kinase Inhibitors)                                                                                         | Multiple                    | Yi-Long Wu <sup>7</sup>              | 2014             | NCT01121393   | Phase III            | Randomized    | None         | 2 arms |
| 8   | 4        | Afatinib      | 2              | 2017                        | Advanced squamous NSCLC progressing during/after platinum chemotherapy                                                                                                                      | Multiple                    | Jean-Charles Soria <sup>8</sup>      | 2015             | NCT01523587   | Phase III            | Randomized    | None         | 2 arms |
| 9   | 5        | Dacomitinib   | 1              | 2019                        | Monotherapy for first-line treatment of advanced NSCLC with EGFR exon 19 deletion or exon 21 L858R mutation                                                                                 | Single                      | Yi-Long Wu <sup>9</sup>              | 2017             | NCT01774721   | Phase III            | Randomized    | None         | 2 arms |
| 10  | 6        | Osimertinib   | 1              | 2017                        | Indicated for adults with advanced NSCLC harboring EGFR T790M mutation, progressing after EGFR-TKIs treatment                                                                               | Multiple                    | Min Hu <sup>10</sup>                 | 2018             | NCT02442349   | Phase II             | Nonrandomized | None         | 1 arm  |
| 11  | 6        | Osimertinib   | 2              | 2019                        | First-line treatment for adults with advanced NSCLC harboring EGFR exon 19 deletion or exon 21 (L858R) mutation                                                                             | Multiple                    | J.-C. Soria <sup>11</sup>            | 2018             | NCT02296125   | Phase III            | Randomized    | Double-blind | 2 arms |
| 12  | 6        | Osimertinib   | 3              | 2021                        | Treatment for NSCLC with EGFR exon 19 deletions or exon 21 (L858R) mutations post-surgery, with or without adjuvant chemotherapy                                                            | Multiple                    | Yi-Long Wu <sup>12</sup>             | 2020             | NCT02511106   | Phase III            | Randomized    | Double-blind | 2 arms |
| 13  | 7        | Almonertinib  | 1              | 2020                        | Treatment for advanced NSCLC with EGFR T790M mutation, progressing after EGFR-TKIs therapy                                                                                                  | Multiple                    | Shun Lu <sup>13</sup>                | 2021             | NCT02981108   | Phase II             | Nonrandomized | None         | 1 arm  |
| 14  | 7        | Almonertinib  | 2              | 2021                        | First-line treatment for advanced NSCLC with EGFR exon 19 deletion or exon 21 (L858R) mutation                                                                                              | Multiple                    | Shun Lu <sup>14</sup>                | 2022             | NCT03849768   | Phase III            | Randomized    | Double-blind | 2 arms |
| 15  | 8        | Furmonertinib | 1              | 2021                        | Treatment for advanced NSCLC with EGFR T790M mutation, progressing after EGFR-TKIs                                                                                                          | Multiple                    | Yuankai Shi <sup>15</sup>            | 2021             | NCT03452592   | Phase IIb            | Nonrandomized | None         | 1 arm  |
| 16  | 8        | Furmonertinib | 2              | 2022                        | First-line treatment for advanced NSCLC with EGFR exon 19 deletion or exon 21 L858R mutations                                                                                               | Multiple                    | Yuankai Shi <sup>16</sup>            | 2022             | NCT03787992   | Phase III            | Randomized    | Double-blind | 2 arms |
| 17  | 9        | Befotertinib  | 1              | 2023                        | For treating adults with advanced NSCLC harboring EGFR T790M mutation who have progressed on or after EGFR-TKIs therapy                                                                     | Single                      | Shun Lu <sup>17</sup>                | 2022             | NCT03861156   | Phase II             | Nonrandomized | None         | 1 arm  |
| 18  | 10       | Crizotinib    | 1              | 2013                        | Treatment for ALK-positive advanced NSCLC                                                                                                                                                   | Multiple                    | Alice T. Shaw <sup>18</sup>          | 2013             | NCT00932893   | Phase III            | Randomized    | None         | 2 arms |
| 19  | 10       | Crizotinib    | 2              | 2016                        | Treatment for advanced NSCLC with ROS1 positivity                                                                                                                                           | Multiple                    | Yi-Long Wu <sup>19</sup>             | 2018             | NCT01945021   | Phase II             | Nonrandomized | None         | 1 arm  |
| 20  | 11       | Alectinib     | 1              | 2018                        | For the treatment of patients with locally advanced or metastatic NSCLC who are ALK-positive                                                                                                | Single                      | Solange Peters <sup>20</sup>         | 2017             | NCT02075840   | Phase III            | Randomized    | None         | 2 arms |
| 21  | 12       | Ceritinib     | 1              | 2018                        | For ALK-positive advanced NSCLC patients progressing or intolerant to crizotinib                                                                                                            | Multiple                    | Alice T Shaw <sup>21</sup>           | 2017             | NCT01828112   | Phase III            | Randomized    | None         | 2 arms |
| 22  | 12       | Ceritinib     | 2              | 2020                        | Monotherapy for ALK-positive advanced or metastatic NSCLC                                                                                                                                   | Multiple                    | Jean-Charles Soria <sup>22</sup>     | 2017             | NCT01828099   | Phase III            | Randomized    | None         | 2 arms |
| 23  | 13       | Ensartinib    | 1              | 2020                        | For ALK-positive advanced NSCLC patients progressing or intolerant to crizotinib                                                                                                            | Multiple                    | Yunpeng Yang <sup>23</sup>           | 2019             | NCT03215693   | Phase II             | Nonrandomized | None         | 1 arm  |
| 24  | 13       | Ensartinib    | 2              | 2022                        | Monotherapy for ALK-positive advanced or metastatic NSCLC                                                                                                                                   | Multiple                    | Leora Horn <sup>24</sup>             | 2021             | NCT02767804   | Phase III            | Randomized    | None         | 2 arms |

| No. | Drug No. | Generic name | Indication No. | Year of indication approval | Indication                                                                                                                                                                                            | Single/Multiple Indications | Initial Pivotal Study (first author)                       | Publication Year | NCT           | Clinical trial phase | Allocation    | Masking       | Arms          |
|-----|----------|--------------|----------------|-----------------------------|-------------------------------------------------------------------------------------------------------------------------------------------------------------------------------------------------------|-----------------------------|------------------------------------------------------------|------------------|---------------|----------------------|---------------|---------------|---------------|
| 25  | 14       | Brigatinib   | 1              | 2022                        | For the treatment of patients with locally advanced or metastatic NSCLC who are ALK-positive                                                                                                          | Single                      | D. Ross Camidge <sup>25,26</sup>                           | 2018/2020        | NCT02737501   | Phase III            | Randomized    | None          | 2 arms        |
| 26  | 15       | Lorlatinib   | 1              | 2022                        | For ALK-positive advanced NSCLC previously treated with ALK TKIs                                                                                                                                      | Multiple                    | Shun Lu <sup>27</sup>                                      | 2022             | NCT03909971   | Phase IIa            | Nonrandomized | None          | ≥3 arms       |
| 27  | 15       | Lorlatinib   | 2              | 2022                        | Monotherapy for ALK-positive advanced or metastatic NSCLC                                                                                                                                             | Multiple                    | Alice T. Shaw <sup>28</sup>                                | 2020             | NCT03052608   | Phase III            | Randomized    | None          | 2 arms        |
| 28  | 16       | Iruplinalkib | 1              | 2023                        | Treatment for ALK-positive advanced NSCLC progressing or intolerant to crizotinib                                                                                                                     | Multiple                    | Yuankai Shi <sup>29</sup>                                  | 2023             | NCT04641754   | Phase II             | Nonrandomized | None          | 1 arm         |
| 29  | 16       | Iruplinalkib | 2              | 2024                        | Monotherapy is suitable for the treatment of ALK-positive advanced or metastatic NSCLC                                                                                                                | Multiple                    | Yuankai Shi <sup>30</sup>                                  | 2024             | NCT04632758   | Phase III            | Randomized    | None          | 2 arms        |
| 30  | 17       | Bevacizumab  | 1              | 2010                        | Bevacizumab with fluoropyrimidine-based chemotherapy is suitable for metastatic colorectal cancer                                                                                                     | Multiple                    | J Cassidy <sup>31</sup>                                    | 2011             | NCT00069095   | Phase III            | Randomized    | Double-blind  | ≥3 arms       |
| 31  | 17       | Bevacizumab  | 2              | 2015                        | Bevacizumab with platinum-based chemotherapy for first-line treatment of advanced, metastatic, or recurrent non-squamous NSCLC                                                                        | Multiple                    | Alan Sandler <sup>32</sup>                                 | 2007             | NCT00021060   | Phase III            | Randomized    | None          | 2 arms        |
| 32  | 17       | Bevacizumab  | 3              | 2020                        | Treatment for adult patients with recurrent glioblastoma                                                                                                                                              | Multiple                    | Wolfgang Wick <sup>33</sup>                                | 2017             | NCT01290939   | Phase III            | Randomized    | None          | 2 arms        |
| 33  | 17       | Bevacizumab  | 4              | 2021                        | Combination atezolizumab treatment for patients with previously untreated, unresectable hepatocellular carcinoma                                                                                      | Multiple                    | Richard S. Finn <sup>34</sup>                              | 2020             | NCT03434379   | Phase III            | Randomized    | None          | 2 arms        |
| 34  | 17       | Bevacizumab  | 5              | 2021                        | Bevacizumab combined with carboplatin and paclitaxel for first-line treatment of stage III or IV epithelial ovarian cancer, fallopian tube cancer, or primary peritoneal cancer after initial surgery | Multiple                    | Robert A. Burger <sup>35</sup>                             | 2011             | NCT00262847   | Phase III            | Randomized    | Double-blind  | ≥3 arms       |
| 35  | 17       | Bevacizumab  | 6              | 2021                        | Bevacizumab combined with paclitaxel and cisplatin or paclitaxel and topotecan for the treatment of patients with persistent, recurrent, or metastatic cervical cancer.                               | Multiple                    | Krishnansu S. Tewari <sup>36</sup>                         | 2014             | NCT00803062   | Phase III            | Randomized    | None          | ≥3 arms       |
| 36  | 18       | Endostatin   | 1              | 2005                        | Combined with vinorelbine/cisplatin chemotherapy regimen for the treatment of newly diagnosed or relapsed stage III-IV NSCLC patients                                                                 | Single                      | Not available                                              | Not available    | Not available | Not available        | Not available | Not available | Not available |
| 37  | 19       | Anlotinib    | 1              | 2018                        | The drug is suitable for advanced NSCLC patients progressing after at least two prior chemotherapies. For EGFR mutations or ALK positivity, targeted therapy should have been used before             | Multiple                    | Baohui Han <sup>37</sup>                                   | 2018             | NCT02388919   | Phase III            | Randomized    | Double-blind  | 2 arms        |
| 38  | 19       | Anlotinib    | 2              | 2019                        | For advanced soft tissue sarcomas (alveolar soft part sarcoma, clear cell sarcoma) progressing or relapsing after one anthracycline-containing chemotherapy                                           | Multiple                    | Yihebal Chi <sup>38</sup>                                  | 2018             | NCT02449343   | Phase III            | Randomized    | Double-blind  | 2 arms        |
| 39  | 19       | Anlotinib    | 3              | 2019                        | Single-agent therapy for small cell lung cancer progressing or relapsing after two prior chemotherapies                                                                                               | Multiple                    | Ying Cheng <sup>39</sup>                                   | 2021             | NCT03059797   | Phase II             | Randomized    | Double-blind  | 2 arms        |
| 40  | 19       | Anlotinib    | 4              | 2021                        | For the treatment of patients with symptomatic or progressive, unresectable locally advanced or metastatic medullary thyroid carcinoma                                                                | Multiple                    | Dapeng Li <sup>40</sup>                                    | 2021             | NCT02586350   | Phase II             | Randomized    | Double-blind  | 2 arms        |
| 41  | 19       | Anlotinib    | 5              | 2022                        | For patients with progressive, locally advanced, or metastatic radioiodine-refractory differentiated thyroid cancer                                                                                   | Multiple                    | Yihebal Chi <sup>41</sup>                                  | 2020             | NCT02586337   | Phase II             | Randomized    | Double-blind  | 2 arms        |
| 42  | 20       | Everolimus   | 1              | 2013                        | Advanced renal cell carcinoma that has failed prior treatment with sunitinib or sorafenib, with data primarily based on clear cell renal carcinoma                                                    | Multiple                    | Robert J. Motzer <sup>42</sup>                             | 2010             | NCT00410124   | Phase III            | Randomized    | Double-blind  | 2 arms        |
| 43  | 20       | Everolimus   | 2              | 2014                        | Adult patients with unresectable, locally advanced or metastatic, well-differentiated (moderately or well-differentiated) advanced pancreatic neuroendocrine tumors                                   | Multiple                    | James C. Yao <sup>43</sup>                                 | 2011             | NCT00510068   | Phase III            | Randomized    | Double-blind  | 2 arms        |
| 44  | 20       | Everolimus   | 3              | 2014                        | Adult and pediatric patients with tuberous sclerosis complex-associated subependymal giant cell astrocytoma requiring therapeutic intervention but not amenable to surgical resection                 | Multiple                    | David Neal Franz <sup>44</sup>                             | 2013             | NCT00789828   | Phase III            | Randomized    | Double-blind  | 2 arms        |
| 45  | 20       | Everolimus   | 4              | 2016                        | For the treatment of adult patients with tuberous sclerosis complex-associated renal angiomyolipomas that do not require immediate surgical intervention                                              | Multiple                    | John J Bissler <sup>45</sup>                               | 2013             | NCT00790400   | Phase III            | Randomized    | Double-blind  | 2 arms        |
| 46  | 20       | Everolimus   | 5              | 2018                        | Adult patients with locally advanced or metastatic, well-differentiated, progressive, non-functional gastroenteropancreatic or lung neuroendocrine tumors (NETs) that cannot be surgically resected   | Multiple                    | James C Yao <sup>46</sup>                                  | 2015             | NCT01524783   | Phase III            | Randomized    | Double-blind  | 2 arms        |
| 47  | 20       | Everolimus   | 6              | 2022                        | Everolimus with exemestane for postmenopausal women with HR-positive, HER2-negative advanced breast cancer after letrozole or anastrozole failure                                                     | Multiple                    | Denise A. Yardley <sup>47</sup> & M. Piccart <sup>48</sup> | 2013/2014        | NCT00863655   | Phase III            | Randomized    | Double-blind  | 2 arms        |

| No. | Drug No. | Generic name  | Indication No. | Year of indication approval | Indication                                                                                                                                                                                                                                                                                                                                        | Single/Multiple Indications | Initial Pivotal Study (first author)                      | Publication Year | NCT                       | Clinical trial phase | Allocation    | Masking      | Arms   |
|-----|----------|---------------|----------------|-----------------------------|---------------------------------------------------------------------------------------------------------------------------------------------------------------------------------------------------------------------------------------------------------------------------------------------------------------------------------------------------|-----------------------------|-----------------------------------------------------------|------------------|---------------------------|----------------------|---------------|--------------|--------|
| 48  | 21       | Pralsetinib   | 1              | 2021                        | Treatment for adult patients with locally advanced or metastatic NSCLC with RET gene fusion positive                                                                                                                                                                                                                                              | Multiple                    | Justin F Gainor <sup>49</sup>                             | 2021             | NCT03037385               | Phase/II             | Nonrandomized | None         | 1 arm  |
| 49  | 21       | Pralsetinib   | 2              | 2022                        | For adults and pediatric patients ≥12 years with advanced/metastatic RET-mutant MTC or RET fusion-positive thyroid cancer, requiring systemic therapy and refractory to radioactive iodine (if applicable)                                                                                                                                        | Multiple                    | Vivek Subbiah <sup>50</sup>                               | 2021             | NCT03037385               | Phase/II             | Nonrandomized | None         | 1 arm  |
| 50  | 22       | Selpercatinib | 1              | 2022                        | For the treatment of adult patients with locally advanced or metastatic RET-positive NSCLC                                                                                                                                                                                                                                                        | Multiple                    | A. Drilon <sup>51</sup>                                   | 2020             | NCT03157128               | Phase/II             | Nonrandomized | None         | 1 arm  |
| 51  | 22       | Selpercatinib | 2              | 2022                        | For adults and pediatric patients ≥12 years with advanced/metastatic RET-mutant MTC or RET fusion-positive thyroid cancer, requiring systemic therapy and refractory to radioactive iodine (if applicable)                                                                                                                                        | Multiple                    | L.J. Wirth <sup>52</sup>                                  | 2020             | NCT03157128               | Phase/II             | Nonrandomized | None         | 1 arm  |
| 52  | 23       | Savolitinib   | 1              | 2021                        | For adults with advanced metastatic NSCLC with MET exon 14 mutation who progressed or are intolerant to platinum-based chemotherapy                                                                                                                                                                                                               | Single                      | Shun Lu <sup>53</sup>                                     | 2021             | NCT02897479               | Phase II             | Nonrandomized | None         | 1 arm  |
| 53  | 24       | Glumetinib    | 1              | 2023                        | For the treatment of locally advanced or metastatic NSCLC with MET exon 14 skipping mutation                                                                                                                                                                                                                                                      | Single                      | Yongfeng Yu <sup>54</sup>                                 | 2023             | NCT04270591               | Phase Ib/II          | Nonrandomized | None         | 1 arm  |
| 54  | 25       | Dabrafenib    | 1              | 2019                        | Dabrafenib combined with trametinib is used to treat patients with unresectable or metastatic melanoma with BRAF V600E/K mutations                                                                                                                                                                                                                | Multiple                    | Georgina V Long <sup>55,56</sup>                          | 2014/2015        | NCT01584648               | Phase III            | Randomized    | Double-blind | 2 arms |
| 55  | 25       | Dabrafenib    | 2              | 2020/3/6                    | Dabrafenib combined with trametinib is suitable for adjuvant treatment in patients with stage III melanoma with BRAF V600E/K mutations after complete resection                                                                                                                                                                                   | Multiple                    | G.V. Long <sup>57</sup>                                   | 2017             | NCT01682083               | Phase III            | Randomized    | Double-blind | 2 arms |
| 56  | 25       | Dabrafenib    | 3              | 2022                        | Dabrafenib combined with trametinib is used to treat patients with metastatic NSCLC with BRAF V600 mutations                                                                                                                                                                                                                                      | Multiple                    | David Planchard <sup>58-60</sup>                          | 2016/2016/2017   | NCT01336634               | Phase II             | Nonrandomized | None         | 1 arm  |
| 57  | 26       | Trametinib    | 1              | 2019                        | Trametinib combined with dabrafenib is used to treat patients with unresectable or metastatic melanoma with BRAF V600E/K mutations                                                                                                                                                                                                                | Multiple                    | Georgina V Long <sup>55,56</sup>                          | 2014/2015        | NCT01584648               | Phase III            | Randomized    | Double-blind | 2 arms |
| 58  | 26       | Trametinib    | 2              | 2020                        | Trametinib combined with dabrafenib is suitable for adjuvant treatment in patients with completely resected stage III melanoma with BRAF V600E/K mutations                                                                                                                                                                                        | Multiple                    | G.V. Long <sup>57</sup>                                   | 2017             | NCT01682083               | Phase III            | Randomized    | Double-blind | 2 arms |
| 59  | 26       | Trametinib    | 3              | 2022                        | Trametinib combined with dabrafenib is used to treat patients with metastatic NSCLC with BRAF V600 mutations                                                                                                                                                                                                                                      | Multiple                    | David Planchard <sup>58-60</sup>                          | 2016/2016/2017   | NCT01336634               | Phase II             | Nonrandomized | None         | 1 arm  |
| 60  | 27       | Entrectinib   | 1              | 2022                        | Indicated for adults and pediatric patients ≥12 years with solid tumors meeting the following criteria: Diagnosed with NTRK gene fusions (excluding acquired resistance mutations); Locally advanced, metastatic, or surgically resectable with severe complications; No satisfactory alternative treatments or failure of prior therapies.       | Multiple                    | Robert C Doebele <sup>61</sup>                            | 2019             | NCT02097810 & NCT02568267 | Phase I & II         | Nonrandomized | None         | 1 arm  |
| 61  | 27       | Entrectinib   | 2              | 2022                        | Indicated for adult patients with locally advanced or metastatic ROS1-positive NSCLC                                                                                                                                                                                                                                                              | Multiple                    | Alexander Drilon <sup>62</sup>                            | 2019             | NCT02097810 & NCT02568267 | Phase I & II         | Nonrandomized | None         | 1 arm  |
| 62  | 27       | Entrectinib   | 3              | 2024                        | Indicated for adults and pediatric patients ≥1 month of age with solid tumors meeting the following criteria: Diagnosed with NTRK gene fusions (excluding acquired resistance mutations); Locally advanced, metastatic, or surgically resectable with severe complications; No satisfactory alternative treatments or failure of prior therapies. | Multiple                    | Ami V. Desai <sup>63</sup>                                | 2022             | NCT02650401 & NCT04589845 | Phase I/II & II      | Nonrandomized | None         | 1 arm  |
| 63  | 28       | Mobocertinib  | 1              | 2023                        | For adults with advanced NSCLC harboring EGFR exon 20 insertion mutation who progressed during or after platinum-based chemotherapy                                                                                                                                                                                                               | Single                      | Caicun Zhou <sup>64</sup>                                 | 2021             | NCT02716116               | Phase I & II         | Nonrandomized | None         | 1 arm  |
| 64  | 29       | Nivolumab     | 1              | 2018                        | Indicated as monotherapy for the treatment of adult patients with locally advanced or metastatic NSCLC that is EGFR mutation-negative and ALK-negative, who have experienced disease progression or intolerance after prior platinum-based chemotherapy                                                                                           | Multiple                    | Yi-Long Wu <sup>65</sup>                                  | 2019             | NCT02613507               | Phase III            | Randomized    | None         | 2 arms |
| 65  | 29       | Nivolumab     | 2              | 2019                        | Indicated as monotherapy for recurrent or metastatic SCCHN patients with PD-L1-expressing tumors (≥1%) and disease progression on or after platinum-based therapy                                                                                                                                                                                 | Multiple                    | Robert L. Ferris <sup>66,67</sup>                         | 2016/2018        | NCT02105636               | Phase III            | Randomized    | None         | 2 arms |
| 66  | 29       | Nivolumab     | 3              | 2020                        | Patients with advanced or recurrent gastric or gastroesophageal junction adenocarcinoma who have received two or more prior systemic treatment regimens                                                                                                                                                                                           | Multiple                    | Yoon-Koo Kang <sup>68</sup> & Li-Tzong Chen <sup>69</sup> | 2017/2020        | NCT02267343               | Phase III            | Randomized    | Double-blind | 2 arms |

| No. | Drug No. | Generic name  | Indication No. | Year of indication approval | Indication                                                                                                                                                                                                                                                                                                                         | Single/Multiple Indications | Initial Pivotal Study (first author)                        | Publication Year | NCT                       | Clinical trial phase | Allocation    | Masking      | Arms    |
|-----|----------|---------------|----------------|-----------------------------|------------------------------------------------------------------------------------------------------------------------------------------------------------------------------------------------------------------------------------------------------------------------------------------------------------------------------------|-----------------------------|-------------------------------------------------------------|------------------|---------------------------|----------------------|---------------|--------------|---------|
| 67  | 29       | Nivolumab     | 4              | 2021                        | Nivolumab combined with ipilimumab for adult patients with unresectable, previously untreated non-epithelioid malignant pleural mesothelioma                                                                                                                                                                                       | Multiple                    | Paul Baas <sup>70</sup>                                     | 2021             | NCT02899299               | Phase III            | Randomized    | None         | ≥3 arms |
| 68  | 29       | Nivolumab     | 5              | 2021                        | Nivolumab with fluoropyrimidine and platinum chemotherapy is for first-line treatment of advanced or metastatic gastric, gastroesophageal junction, or esophageal adenocarcinoma                                                                                                                                                   | Multiple                    | Yelena Y Janjigian <sup>71</sup>                            | 2021             | NCT02872116               | Phase III            | Randomized    | None         | ≥3 arms |
| 69  | 29       | Nivolumab     | 6              | 2022                        | Nivolumab combined with fluoropyrimidine and platinum-based chemotherapy is suitable for first-line treatment of patients with advanced or metastatic esophageal squamous cell carcinoma                                                                                                                                           | Multiple                    | Y. Doki <sup>72</sup>                                       | 2022             | NCT03143153               | Phase III            | Randomized    | None         | ≥3 arms |
| 70  | 29       | Nivolumab     | 7              | 2022                        | Adjuvant treatment for patients with esophageal or gastroesophageal junction cancer who have residual pathology after neoadjuvant chemoradiotherapy and complete surgical resection                                                                                                                                                | Multiple                    | R.J. Kelly <sup>73</sup>                                    | 2021             | NCT02743494               | Phase III            | Randomized    | Double-blind | 2 arms  |
| 71  | 29       | Nivolumab     | 8              | 2023                        | Nivolumab with platinum-based chemotherapy is for neoadjuvant treatment of resectable NSCLC (tumor ≥4 cm or lymph node positive) in adults                                                                                                                                                                                         | Multiple                    | P.M. Forde <sup>74</sup>                                    | 2022             | NCT02998528               | Phase III            | Randomized    | None         | 2 arms  |
| 72  | 29       | Nivolumab     | 9              | 2023                        | For adjuvant treatment of patients with urothelial carcinoma at high risk of recurrence after radical cystectomy                                                                                                                                                                                                                   | Multiple                    | D.F. Bajorin <sup>75</sup>                                  | 2021             | NCT02632409               | Phase III            | Randomized    | Double-blind | 2 arms  |
| 73  | 29       | Nivolumab     | 10             | 2024                        | For first-line treatment of patients with unresectable or metastatic microsatellite instability-high (MSI-H) or mismatch repair deficient (dMMR) colorectal cancer (CRC)                                                                                                                                                           | Multiple                    | T. Andre <sup>76</sup>                                      | 2024             | NCT04008030               | Phase III            | Randomized    | None         | 2 arms  |
| 74  | 29       | Nivolumab     | 11             | 2024                        | Nivolumab combined with cisplatin and gemcitabine for first-line treatment in adult patients with unresectable or metastatic urothelial carcinoma                                                                                                                                                                                  | Multiple                    | M.S. van der Heijden <sup>77</sup>                          | 2023             | NCT03036098               | Phase III            | Randomized    | None         | 2 arms  |
| 75  | 30       | Pembrolizumab | 1              | 2018                        | For the treatment of unresectable or metastatic melanoma after failure of first-line therapy                                                                                                                                                                                                                                       | Multiple                    | Lu Si <sup>78</sup>                                         | 2019             | NCT02821000               | Phase Ib             | Nonrandomized | None         | 1 arm   |
| 76  | 30       | Pembrolizumab | 2              | 2019                        | Pembrolizumab with pemetrexed and platinum chemotherapy is for first-line treatment of metastatic non-squamous NSCLC with EGFR and ALK-negative mutations                                                                                                                                                                          | Multiple                    | L. Gandhi <sup>79</sup>                                     | 2018             | NCT02578680               | Phase III            | Randomized    | Double-blind | 2 arms  |
| 77  | 30       | Pembrolizumab | 3              | 2019                        | Pembrolizumab is indicated as first-line monotherapy for EGFR-negative, ALK-negative, locally advanced or metastatic NSCLC with PD-L1 ≥1%, as approved by the National Medical Products Administration                                                                                                                             | Multiple                    | Tony S K Mok <sup>80</sup>                                  | 2019             | NCT02220894               | Phase III            | Randomized    | None         | 2 arms  |
| 78  | 30       | Pembrolizumab | 4              | 2019                        | Pembrolizumab combined with carboplatin and paclitaxel is suitable for first-line treatment of patients with metastatic squamous NSCLC                                                                                                                                                                                             | Multiple                    | L. Paz-Ares <sup>81</sup>                                   | 2018             | NCT02775435               | Phase III            | Randomized    | Double-blind | 2 arms  |
| 79  | 30       | Pembrolizumab | 5              | 2020                        | Pembrolizumab monotherapy is for advanced or metastatic esophageal squamous cell carcinoma with PD-L1 CPS ≥10 in patients who failed first-line treatment, as approved by the National Medical Products Administration                                                                                                             | Multiple                    | Takashi Kojima <sup>82</sup>                                | 2020             | NCT02564263               | Phase III            | Randomized    | None         | 2 arms  |
| 80  | 30       | Pembrolizumab | 6              | 2020                        | Pembrolizumab monotherapy is for first-line treatment of metastatic or unresectable recurrent HNSCC with PD-L1 CPS ≥20, as assessed by a validated test                                                                                                                                                                            | Multiple                    | Barbara Burtness <sup>83</sup>                              | 2019             | NCT02358031               | Phase III            | Randomized    | None         | ≥3 arms |
| 81  | 30       | Pembrolizumab | 7              | 2021                        | Pembrolizumab monotherapy is for first-line treatment of unresectable or metastatic MSI-H or dMMR CRC with wild-type KRAS, NRAS, and BRAF genes                                                                                                                                                                                    | Multiple                    | T. Andre <sup>84</sup>                                      | 2020             | NCT02563002               | Phase III            | Randomized    | None         | 2 arms  |
| 82  | 30       | Pembrolizumab | 8              | 2021                        | Pembrolizumab combined with platinum-based and fluoropyrimidine chemotherapy for first-line treatment of locally advanced unresectable or metastatic esophageal/gastroesophageal junction cancer                                                                                                                                   | Multiple                    | Jong-Mu Sun <sup>85</sup>                                   | 2021             | NCT03189719               | Phase III            | Randomized    | Double-blind | 2 arms  |
| 83  | 30       | Pembrolizumab | 9              | 2022                        | Pembrolizumab monotherapy for the treatment of patients with hepatocellular carcinoma (HCC) who have been previously treated with sorafenib or chemotherapy containing oxaliplatin                                                                                                                                                 | Multiple                    | Shukai Qin <sup>86</sup>                                    | 2022             | NCT03062358               | Phase III            | Randomized    | Double-blind | 2 arms  |
| 84  | 30       | Pembrolizumab | 10             | 2022                        | Pembrolizumab combined with chemotherapy as neoadjuvant treatment, followed by pembrolizumab monotherapy as adjuvant treatment for early high-risk PD-L1-positive (CPS ≥20) triple-negative breast cancer (TNBC)                                                                                                                   | Multiple                    | P. Schmid <sup>87,88</sup>                                  | 2020/2022        | NCT03036488               | Phase III            | Randomized    | Double-blind | 2 arms  |
| 85  | 30       | Pembrolizumab | 11             | 2023                        | Monotherapy for adult patients with advanced unresectable or metastatic solid tumors with high microsatellite instability (MSI-H) or defective mismatch repair (dMMR), including colorectal cancer progressing after fluoropyrimidines, oxaliplatin, and irinotecan, and other solid tumors with no satisfactory treatment options | Multiple                    | Dung T. Le <sup>89</sup> & Aurelien Marabelle <sup>90</sup> | 2020/2020        | NCT02460198 & NCT02628067 | Phase II             | Nonrandomized | None         | 1 arm   |

| No. | Drug No. | Generic name  | Indication No. | Year of indication approval | Indication                                                                                                                                                                                                        | Single/Multiple Indications | Initial Pivotal Study (first author) | Publication Year | NCT         | Clinical trial phase | Allocation    | Masking      | Arms          |
|-----|----------|---------------|----------------|-----------------------------|-------------------------------------------------------------------------------------------------------------------------------------------------------------------------------------------------------------------|-----------------------------|--------------------------------------|------------------|-------------|----------------------|---------------|--------------|---------------|
| 86  | 30       | Pembrolizumab | 12             | 2023                        | Pembrolizumab with fluoropyrimidine and platinum-based chemotherapy for first-line treatment of locally advanced unresectable or metastatic HER2-negative gastric/gastroesophageal junction adenocarcinoma        | Multiple                    | Sun Young Rha <sup>91</sup>          | 2023             | NCT03675737 | Phase III            | Randomized    | Double-blind | 2 arms        |
| 87  | 30       | Pembrolizumab | 13             | 2024                        | Pembrolizumab combined with gemcitabine and cisplatin for first-line treatment of patients with locally advanced or metastatic biliary tract cancer (BTC)                                                         | Multiple                    | Robin Kate Kelley <sup>92</sup>      | 2023             | NCT04003636 | Phase III            | Randomized    | Double-blind | 2 arms        |
| 88  | 30       | Pembrolizumab | 14             | 2024                        | Pembrolizumab with trastuzumab, fluoropyrimidine, and platinum-based chemotherapy for first-line treatment of HER2-positive gastric/gastroesophageal junction adenocarcinoma with PD-L1 expression (CPS $\geq$ 1) | Multiple                    | Yelena Y. Janjigian <sup>93</sup>    | 2024             | NCT03615326 | Phase III            | Randomized    | Double-blind | 2 arms        |
| 89  | 31       | Durvalumab    | 1              | 2019                        | Treatment for unresectable stage III NSCLC patients without progression after platinum-based chemotherapy and concurrent radiotherapy                                                                             | Multiple                    | S.J. Antonia <sup>94</sup>           | 2017             | NCT02125461 | Phase III            | Randomized    | Double-blind | 2 arms        |
| 90  | 31       | Durvalumab    | 2              | 2021                        | Durvalumab combined with etoposide and carboplatin or cisplatin as first-line treatment for adult patients with extensive-stage small cell lung cancer (ES-SCLC)                                                  | Multiple                    | Luis Paz-Ares <sup>95</sup>          | 2019             | NCT03043872 | Phase III            | Randomized    | None         | $\geq$ 3 arms |
| 91  | 31       | Durvalumab    | 3              | 2023                        | Durvalumab combined with gemcitabine and cisplatin for the first-line treatment of adult patients with locally advanced or metastatic biliary tract cancer (BTC)                                                  | Multiple                    | Do-Youn Oh <sup>96</sup>             | 2022             | NCT03875235 | Phase III            | Randomized    | Double-blind | 2 arms        |
| 92  | 32       | Atezolizumab  | 1              | 2020                        | Atezolizumab combined with carboplatin and etoposide for first-line treatment of ES-SCLC patients                                                                                                                 | Multiple                    | L. Horn <sup>97</sup>                | 2018             | NCT02763579 | Phase III            | Randomized    | Double-blind | 2 arms        |
| 93  | 32       | Atezolizumab  | 2              | 2020                        | Atezolizumab combined with bevacizumab treatment for patients with previously untreated, unresectable hepatocellular carcinoma                                                                                    | Multiple                    | Richard S. Finn <sup>98</sup>        | 2020             | NCT03434379 | Phase III            | Randomized    | None         | 2 arms        |
| 94  | 32       | Atezolizumab  | 3              | 2021                        | First-line monotherapy for metastatic EGFR- and ALK-negative NSCLC, with PD-L1 positive in $\geq$ 50% of tumor cells (TC $\geq$ 50%) or immune cells covering $\geq$ 10% of the tumor (IC $\geq$ 10%)             | Multiple                    | Roy S. Herbst <sup>99</sup>          | 2020             | NCT02409342 | Phase III            | Randomized    | None         | 2 arms        |
| 95  | 32       | Atezolizumab  | 4              | 2021                        | Atezolizumab with pemetrexed and platinum-based chemotherapy for first-line treatment of metastatic EGFR- and ALK-negative non-squamous NSCLC                                                                     | Multiple                    | Makoto Nishio <sup>100</sup>         | 2020             | NCT02657434 | Phase III            | Randomized    | None         | 2 arms        |
| 96  | 32       | Atezolizumab  | 5              | 2022                        | Atezolizumab monotherapy for adjuvant treatment of stage II-III NSCLC with PD-L1 TC $\geq$ 1% after surgery and platinum-based chemotherapy                                                                       | Multiple                    | Enriqueta Felip <sup>101</sup>       | 2021             | NCT02486718 | Phase III            | Randomized    | None         | 2 arms        |
| 97  | 33       | Camrelizumab  | 1              | 2019                        | Treatment of patients with relapsed or refractory classical Hodgkin lymphoma who have received at least second-line systemic chemotherapy with a single agent                                                     | Multiple                    | Yuqin Song <sup>102</sup>            | 2019             | NCT03155425 | Phase II             | Nonrandomized | None         | 1 arm         |
| 98  | 33       | Camrelizumab  | 2              | 2020                        | For the treatment of advanced hepatocellular carcinoma patients who have previously received sorafenib treatment and/or systemic chemotherapy containing oxaliplatin                                              | Multiple                    | Shukui Qin <sup>103</sup>            | 2020             | NCT02989922 | Phase II             | Randomized    | None         | 2 arms        |
| 99  | 33       | Camrelizumab  | 3              | 2020                        | Monotherapy for the treatment of patients with locally advanced or metastatic esophageal squamous cell carcinoma who have experienced disease progression or intolerance to prior first-line chemotherapy         | Multiple                    | Jing Huang <sup>104</sup>            | 2020             | NCT03099382 | Phase III            | Randomized    | None         | 2 arms        |
| 100 | 33       | Camrelizumab  | 4              | 2020                        | Camrelizumab combined with pemetrexed and carboplatin is suitable for first-line treatment of EGFR-negative, ALK-negative, locally advanced or metastatic non-squamous NSCLC that is not amenable to surgery      | Multiple                    | Caicun Zhou <sup>105</sup>           | 2020             | NCT03134872 | Phase III            | Randomized    | None         | 2 arms        |
| 101 | 33       | Camrelizumab  | 5              | 2021                        | For the treatment of advanced nasopharyngeal carcinoma patients who have experienced disease progression or intolerance after second-line or above chemotherapy                                                   | Multiple                    | Yunpeng Yang <sup>106</sup>          | 2021             | NCT03558191 | Phase II             | Nonrandomized | None         | 1 arm         |
| 102 | 33       | Camrelizumab  | 6              | 2021                        | Camrelizumab combined with cisplatin and gemcitabine for first-line treatment of patients with locally recurrent or metastatic nasopharyngeal carcinoma                                                           | Multiple                    | Yunpeng Yang <sup>107</sup>          | 2021             | NCT03707509 | Phase III            | Randomized    | Double-blind | 2 arms        |
| 103 | 33       | Camrelizumab  | 7              | 2021                        | Camrelizumab combined with paclitaxel and carboplatin is a first-line treatment for locally advanced or metastatic squamous NSCLC                                                                                 | Multiple                    | Shengxiang Ren <sup>108</sup>        | 2021             | NCT03668496 | Phase III            | Randomized    | Double-blind | 2 arms        |
| 104 | 33       | Camrelizumab  | 8              | 2021                        | Camrelizumab combined with paclitaxel and cisplatin for first-line treatment of patients with unresectable locally advanced/recurrent or metastatic esophageal squamous cell carcinoma                            | Multiple                    | Huiyan Luo <sup>109</sup>            | 2021             | NCT03691090 | Phase III            | Randomized    | Double-blind | 2 arms        |

| No. | Drug No. | Generic name | Indication No. | Year of indication approval | Indication                                                                                                                                                                                                                                                                           | Single/Multiple Indications | Initial Pivotal Study (first author) | Publication Year | NCT         | Clinical trial phase | Allocation    | Masking      | Arms    |
|-----|----------|--------------|----------------|-----------------------------|--------------------------------------------------------------------------------------------------------------------------------------------------------------------------------------------------------------------------------------------------------------------------------------|-----------------------------|--------------------------------------|------------------|-------------|----------------------|---------------|--------------|---------|
| 105 | 33       | Camrelizumab | 9              | 2023                        | Camrelizumab combined with apatinib mesylate for first-line treatment of patients with unresectable or metastatic hepatocellular carcinoma                                                                                                                                           | Multiple                    | Shukai Qin <sup>110</sup>            | 2023             | NCT03764293 | Phase III            | Randomized    | None         | 2 arms  |
| 106 | 34       | Tislelizumab | 1              | 2019                        | For the treatment of relapsed or refractory classical Hodgkin lymphoma in patients who have received at least second-line systemic chemotherapy                                                                                                                                      | Multiple                    | Yuqin Song <sup>111</sup>            | 2019             | NCT03209973 | Phase II             | Nonrandomized | None         | 1 arm   |
| 107 | 34       | Tislelizumab | 2              | 2020                        | Treatment for locally advanced or metastatic urothelial carcinoma with high PD-L1 expression after platinum-based chemotherapy failure or progression within 12 months of neoadjuvant/adjuvant chemotherapy                                                                          | Multiple                    | Dingwei Ye <sup>112</sup>            | 2020             | NCT04004221 | Phase II             | Nonrandomized | None         | 1 arm   |
| 108 | 34       | Tislelizumab | 3              | 2021                        | Tislelizumab combined with paclitaxel and carboplatin is a first-line treatment for unresectable locally advanced or metastatic squamous NSCLC                                                                                                                                       | Multiple                    | Jie Wang <sup>113</sup>              | 2021             | NCT03594747 | Phase III            | Randomized    | None         | ≥3 arms |
| 109 | 34       | Tislelizumab | 4              | 2021                        | Tislelizumab with pemetrexed and platinum is a first-line treatment for EGFR-negative, ALK-negative, unresectable advanced or metastatic non-squamous NSCLC                                                                                                                          | Multiple                    | Shun Lu <sup>114</sup>               | 2021             | NCT03663205 | Phase III            | Randomized    | None         | 2 arms  |
| 110 | 34       | Tislelizumab | 5              | 2021                        | Indicated for the treatment of hepatocellular carcinoma in patients who have received at least one systemic therapy                                                                                                                                                                  | Multiple                    | Zhenggang Ren <sup>115</sup>         | 2022             | NCT03419897 | Phase II             | Nonrandomized | None         | 1 arm   |
| 111 | 34       | Tislelizumab | 6              | 2021                        | Monotherapy is indicated for adults with EGFR and ALK-negative, platinum-treated, locally advanced or metastatic NSCLC (non-squamous or squamous) with disease progression or intolerance                                                                                            | Multiple                    | Caicun Zhou <sup>116</sup>           | 2022             | NCT03358875 | Phase III            | Randomized    | None         | 2 arms  |
| 112 | 34       | Tislelizumab | 7              | 2022                        | For adult patients with unresectable or metastatic advanced solid tumors, including MSI-H or dMMR, with progression after treatment with fluoropyrimidines, oxaliplatin, and irinotecan for colorectal cancer, or other advanced solid tumors with no satisfactory treatment options | Multiple                    | Jian Li <sup>117</sup>               | 2024             | NCT03736889 | Phase II             | Nonrandomized | None         | 1 arm   |
| 113 | 34       | Tislelizumab | 8              | 2022                        | For the treatment of patients with locally advanced or metastatic esophageal squamous cell carcinoma who have progressed or are intolerant to first-line standard chemotherapy                                                                                                       | Multiple                    | Lin Shen <sup>118</sup>              | 2022             | NCT03430843 | Phase III            | Randomized    | None         | 2 arms  |
| 114 | 34       | Tislelizumab | 9              | 2022                        | Tislelizumab combined with gemcitabine and cisplatin for first-line treatment of recurrent or metastatic nasopharyngeal carcinoma                                                                                                                                                    | Multiple                    | Yunpeng Yang <sup>119</sup>          | 2023             | NCT03924986 | Phase III            | Randomized    | Double-blind | 2 arms  |
| 115 | 34       | Tislelizumab | 10             | 2023                        | Tislelizumab combined with fluoropyrimidine and platinum-based chemotherapy for the first-line treatment of locally advanced or metastatic gastric or gastroesophageal junction adenocarcinoma with high PD-L1 expression                                                            | Multiple                    | Miao-Zhen Qiu <sup>120</sup>         | 2024             | NCT0377657  | Phase III            | Randomized    | Double-blind | 2 arms  |
| 116 | 34       | Tislelizumab | 11             | 2023                        | Tislelizumab combined with paclitaxel and platinum-based drugs or fluoropyrimidine and platinum-based drugs for first-line treatment of unresectable locally advanced, recurrent, or metastatic esophageal squamous cell carcinoma                                                   | Multiple                    | Jianming Xu <sup>121</sup>           | 2023             | NCT03783442 | Phase III            | Randomized    | Double-blind | 2 arms  |
| 117 | 34       | Tislelizumab | 12             | 2023                        | Tislelizumab monotherapy is suitable for the first-line treatment of patients with unresectable or metastatic hepatocellular carcinoma                                                                                                                                               | Multiple                    | Shukai Qin <sup>122</sup>            | 2023             | NCT03412773 | Phase III            | Randomized    | None         | 2 arms  |
| 118 | 34       | Tislelizumab | 13             | 2024                        | Tislelizumab combined with etoposide and platinum-based chemotherapy for first-line treatment of extensive-stage small cell lung cancer (ES-SCLC)                                                                                                                                    | Multiple                    | Ying Cheng <sup>123</sup>            | 2024             | NCT04005716 | Phase III            | Randomized    | Double-blind | 2 arms  |
| 119 | 34       | Tislelizumab | 14             | 2024                        | Tislelizumab combined with platinum-based chemotherapy as neoadjuvant therapy, followed by monotherapy, for resectable stage II or IIIA NSCLC                                                                                                                                        | Multiple                    | Dongsheng Yue <sup>124</sup>         | 2024             | NCT04379635 | Phase III            | Randomized    | Double-blind | 2 arms  |
| 120 | 35       | Sintilimab   | 1              | 2018                        | Treatment of patients with relapsed or refractory classical Hodgkin lymphoma who have received at least second-line systemic chemotherapy with single-agent therapy                                                                                                                  | Multiple                    | Yuankai Shi <sup>125</sup>           | 2019             | NCT03114683 | Phase II             | Nonrandomized | None         | 1 arm   |
| 121 | 35       | Sintilimab   | 2              | 2020                        | Sintilimab combined with paclitaxel and cisplatin or fluorouracil and cisplatin for first-line treatment of unresectable locally advanced, recurrent, or metastatic esophageal squamous cell carcinoma                                                                               | Multiple                    | Zhihao Lu <sup>126</sup>             | 2022             | NCT03748134 | Phase III            | Randomized    | Double-blind | 2 arms  |
| 122 | 35       | Sintilimab   | 3              | 2021                        | Sintilimab with pemetrexed and platinum-based chemotherapy is a first-line treatment for EGFR and ALK-negative, locally advanced or metastatic non-squamous NSCLC not amenable to surgery                                                                                            | Multiple                    | Yunpeng Yang <sup>127</sup>          | 2020             | NCT03607539 | Phase III            | Randomized    | Double-blind | 2 arms  |
| 123 | 35       | Sintilimab   | 4              | 2021                        | Sintilimab with gemcitabine and platinum-based chemotherapy is a first-line treatment for unresectable locally advanced or metastatic squamous NSCLC                                                                                                                                 | Multiple                    | Caicun Zhou <sup>128</sup>           | 2021             | NCT03629925 | Phase III            | Randomized    | Double-blind | 2 arms  |

| No. | Drug No. | Generic name | Indication No. | Year of indication approval | Indication                                                                                                                                                                                                                         | Single/Multiple Indications | Initial Pivotal Study (first author) | Publication Year | NCT         | Clinical trial phase | Allocation    | Masking      | Arms    |
|-----|----------|--------------|----------------|-----------------------------|------------------------------------------------------------------------------------------------------------------------------------------------------------------------------------------------------------------------------------|-----------------------------|--------------------------------------|------------------|-------------|----------------------|---------------|--------------|---------|
| 124 | 35       | Sintilimab   | 5              | 2021                        | Sintilimab combined with bevacizumab (Daoyoutong®) for the first-line treatment of patients with previously untreated, unresectable or metastatic hepatocellular carcinoma                                                         | Multiple                    | Zhenggang Ren <sup>129</sup>         | 2021             | NCT03794440 | PhaseII/III          | Randomized    | None         | 2 arms  |
| 125 | 35       | Sintilimab   | 6              | 2022                        | Sintilimab combined with fluoropyrimidine and platinum-based chemotherapy for the first-line treatment of unresectable locally advanced, recurrent, or metastatic gastric and gastroesophageal junction adenocarcinoma             | Multiple                    | Jianming Xu <sup>130</sup>           | 2023             | NCT03745170 | Phase III            | Randomized    | Double-blind | 2 arms  |
| 126 | 35       | Sintilimab   | 7              | 2023                        | Sintilimab with bevacizumab, pemetrexed, and cisplatin is for patients with EGFR-mutated, locally advanced or metastatic non-squamous NSCLC who have failed EGFR-TKI treatment                                                     | Multiple                    | Shun Lu <sup>131</sup>               | 2023             | NCT03802240 | Phase III            | Randomized    | Double-blind | ≥3 arms |
| 127 | 36       | Ipilimumab   | 1              | 2021                        | Ipilimumab combined with nivolumab for adult patients with unresectable, previously untreated non-epithelioid malignant pleural mesothelioma                                                                                       | Multiple                    | Paul Baas <sup>70</sup>              | 2021             | NCT02899299 | Phase III            | Randomized    | None         | 2 arms  |
| 128 | 36       | Ipilimumab   | 2              | 2024                        | For the first-line treatment of patients with unresectable or metastatic microsatellite instability-high (MSI-H) or mismatch repair deficient (dMMR) colorectal cancer (CRC)                                                       | Multiple                    | T. Andre <sup>76</sup>               | 2024             | NCT04008030 | Phase III            | Randomized    | None         | 2 arms  |
| 129 | 37       | Sugemalimab  | 1              | 2021                        | Sugemalimab with pemetrexed and carboplatin for first-line treatment of metastatic EGFR-negative, ALK-negative non-squamous NSCLC; with paclitaxel and carboplatin for metastatic squamous NSCLC                                   | Multiple                    | Caicun Zhou <sup>132</sup>           | 2022             | NCT03789604 | Phase III            | Randomized    | Double-blind | 2 arms  |
| 130 | 37       | Sugemalimab  | 2              | 2022                        | Indicated for the treatment of patients with unresectable stage III non-small NSCLC who have not experienced disease progression after platinum-based concurrent or sequential chemoradiotherapy                                   | Multiple                    | Qing Zhou <sup>133</sup>             | 2022             | NCT03728556 | Phase III            | Randomized    | Double-blind | 2 arms  |
| 131 | 37       | Sugemalimab  | 3              | 2023                        | Single drug for the treatment of adult patients with relapsed or refractory extranodal NK/T-cell lymphoma (R/R ENKTL)                                                                                                              | Multiple                    | Huiqiang Huang <sup>134</sup>        | 2023             | NCT03595657 | Phase II             | Nonrandomized | None         | 1 arm   |
| 132 | 37       | Sugemalimab  | 4              | 2023                        | Sugemalimab combined with fluoropyrimidine and platinum-based chemotherapy drugs for the first-line treatment of unresectable locally advanced, recurrent, or metastatic esophageal squamous cell carcinoma (ESCC)                 | Multiple                    | Jin Li <sup>135</sup>                | 2024             | NCT04187352 | Phase III            | Randomized    | Double-blind | 2 arms  |
| 133 | 37       | Sugemalimab  | 5              | 2024                        | Sugemalimab with fluoropyrimidine and platinum chemotherapy for first-line treatment of unresectable advanced or metastatic gastric and gastroesophageal junction adenocarcinoma with PD-L1 (CPS ≥ 5)                              | Multiple                    | X. Zhang <sup>136</sup>              | 2023             | NCT03802591 | Phase III            | Randomized    | Double-blind | 2 arms  |
| 134 | 38       | Toripalimab  | 1              | 2018                        | Toripalimab is used for the treatment of patients with unresectable or metastatic melanoma who have failed prior systemic therapy                                                                                                  | Multiple                    | Bixia Tang <sup>137</sup>            | 2020             | NCT03013101 | Phase II             | Nonrandomized | None         | 1 arm   |
| 135 | 38       | Toripalimab  | 2              | 2021                        | Toripalimab is suitable for the treatment of locally advanced or metastatic urothelial carcinoma that has progressed within 12 months after failure of platinum-based chemotherapy, including neoadjuvant or adjuvant chemotherapy | Multiple                    | Xinan Sheng <sup>138</sup>           | 2021             | NCT03113266 | Phase II             | Nonrandomized | None         | 1 arm   |
| 136 | 38       | Toripalimab  | 3              | 2021                        | For the treatment of patients with recurrent/metastatic nasopharyngeal carcinoma who have failed second-line or above systemic therapy                                                                                             | Multiple                    | Feng-Hua Wang <sup>139</sup>         | 2020             | NCT02915432 | PhaseIb/II           | Nonrandomized | None         | 1 arm   |
| 137 | 38       | Toripalimab  | 4              | 2021                        | Toripalimab combined with cisplatin and gemcitabine for first-line treatment of patients with locally recurrent or metastatic nasopharyngeal carcinoma                                                                             | Multiple                    | Hai-Qiang Mai <sup>140</sup>         | 2021             | NCT03581786 | Phase III            | Randomized    | Double-blind | 2 arms  |
| 138 | 38       | Toripalimab  | 5              | 2022                        | Toripalimab combined with paclitaxel and cisplatin is suitable for first-line treatment of unresectable locally advanced/recurrent or metastatic esophageal squamous cell carcinoma                                                | Multiple                    | Zi-Xian Wang <sup>141</sup>          | 2022             | NCT03829969 | Phase III            | Randomized    | Double-blind | 2 arms  |
| 139 | 38       | Toripalimab  | 6              | 2022                        | Toripalimab with pemetrexed and platinum for first-line treatment of advanced or metastatic EGFR- and ALK-negative non-squamous NSCLC                                                                                              | Multiple                    | Zhijie Wang <sup>142</sup>           | 2022             | NCT03856411 | Phase III            | Randomized    | Double-blind | 2 arms  |
| 140 | 38       | Toripalimab  | 7              | 2023                        | Toripalimab with chemotherapy for perioperative treatment, followed by adjuvant monotherapy, for resectable stage IIIA-IIIIB NSCLC                                                                                                 | Multiple                    | Shun Lu <sup>143</sup>               | 2024             | NCT04158440 | Phase III            | Randomized    | Double-blind | 2 arms  |
| 141 | 38       | Toripalimab  | 8              | 2024                        | Toripalimab combined with axitinib for first-line treatment of patients with intermediate or high-risk, unresectable or metastatic renal cell carcinoma                                                                            | Multiple                    | X. Q. Yan <sup>144</sup>             | 2023             | NCT04394975 | Phase III            | Randomized    | None         | 2 arms  |
| 142 | 38       | Toripalimab  | 9              | 2024                        | Toripalimab combined with etoposide and platinum is indicated for first-line treatment of extensive-stage small cell lung cancer (ES-SCLC)                                                                                         | Multiple                    | Y. Cheng <sup>145</sup>              | 2023             | NCT04012606 | Phase III            | Randomized    | Double-blind | 2 arms  |

| No. | Drug No. | Generic name | Indication No. | Year of indication approval | Indication                                                                                                                                                                                                                                               | Single/Multiple Indications | Initial Pivotal Study (first author) | Publication Year | NCT           | Clinical trial phase | Allocation    | Masking      | Arms   |
|-----|----------|--------------|----------------|-----------------------------|----------------------------------------------------------------------------------------------------------------------------------------------------------------------------------------------------------------------------------------------------------|-----------------------------|--------------------------------------|------------------|---------------|----------------------|---------------|--------------|--------|
| 143 | 38       | Toripalimab  | 10             | 2024                        | Toripalimab combined with paclitaxel for injection (albumin-bound) is indicated for first-line treatment of recurrent or metastatic PD-L1-positive (CPS $\geq$ 1) triple-negative breast cancer (TNBC) as assessed by a validated test                   | Multiple                    | Zefei Jiang <sup>146</sup>           | 2024             | NCT03777579   | Phase III            | Randomized    | Double-blind | 2 arms |
| 144 | 39       | Serplulimab  | 1              | 2022                        | For adults with unresectable or metastatic MSI-H solid tumors: colorectal cancer after fluoropyrimidines, oxaliplatin, and irinotecan; gastric cancer after two prior therapies; other solid tumors after one prior therapy, with no alternative options | Multiple                    | Shukai Qin <sup>147</sup>            | 2022             | NCT03941574   | Phase II             | Nonrandomized | None         | 1 arm  |
| 145 | 39       | Serplulimab  | 2              | 2022                        | Serplulimab combined with carboplatin and albumin-bound paclitaxel is indicated for the first-line treatment of unresectable locally advanced or metastatic squamous NSCLC                                                                               | Multiple                    | Caicun Zhou <sup>148</sup>           | 2024             | NCT04033354   | Phase III            | Randomized    | Double-blind | 2 arms |
| 146 | 39       | Serplulimab  | 3              | 2023                        | Serplulimab combined with carboplatin and etoposide is suitable for first-line treatment of extensive-stage small cell lung cancer (ES-SCLC)                                                                                                             | Multiple                    | Ying Cheng <sup>149</sup>            | 2022             | NCT04063163   | Phase III            | Randomized    | Double-blind | 2 arms |
| 147 | 39       | Serplulimab  | 4              | 2023                        | Serplulimab combined with fluoropyrimidine and platinum drugs for the first-line treatment of PD-L1 positive, unresectable locally advanced/recurrent or metastatic esophageal squamous cell carcinoma (ESCC)                                            | Multiple                    | Yan Song <sup>150</sup>              | 2023             | NCT03958890   | Phase III            | Randomized    | Double-blind | 2 arms |
| 148 | 40       | Penpulimab   | 1              | 2021                        | Indicated for adult patients with relapsed or refractory classical Hodgkin lymphoma who have received at least two lines of systemic chemotherapy                                                                                                        | Multiple                    | Yuqin Song <sup>151</sup>            | 2022             | NCT03722147   | Phase II             | Nonrandomized | None         | 1 arm  |
| 149 | 40       | Penpulimab   | 2              | 2023                        | Penpulimab combined with paclitaxel and carboplatin is indicated for first-line treatment of locally advanced or metastatic squamous NSCLC                                                                                                               | Multiple                    | Hua Zhong <sup>152</sup>             | 2024             | NCT03866993   | Phase III            | Randomized    | Double-blind | 2 arms |
| 150 | 40       | Penpulimab   | 3              | 2024                        | For the treatment of adult patients with recurrent/metastatic nasopharyngeal cancer who have failed prior second-line or higher systemic therapy                                                                                                         | Multiple                    | Xiaozhong Chen <sup>153</sup>        | 2024             | NCT03866967   | Phase II             | Nonrandomized | None         | 1 arm  |
| 151 | 41       | Adebrelimab  | 1              | 2023                        | Combined with carboplatin and etoposide for first-line treatment of patients with extensive-stage small cell lung cancer                                                                                                                                 | Single                      | Jie Wang <sup>154</sup>              | 2022             | NCT03711305   | Phase III            | Randomized    | Double-blind | 2 arms |
| 152 | 42       | Sorafenib    | 1              | 2006                        | For the treatment of unresectable advanced renal cell carcinoma                                                                                                                                                                                          | Multiple                    | Bernard Escudier <sup>155,156</sup>  | 2007/2009        | NCT00073307   | Phase III            | Randomized    | Double-blind | 2 arms |
| 153 | 42       | Sorafenib    | 2              | 2008                        | For the treatment of unresectable or metastatic hepatocellular carcinoma                                                                                                                                                                                 | Multiple                    | Josep M. Llovet <sup>157</sup>       | 2008             | NCT00105443   | Phase III            | Randomized    | Double-blind | 2 arms |
| 154 | 42       | Sorafenib    | 3              | 2017                        | For the treatment of locally recurrent or metastatic progressive radioiodine-refractory differentiated thyroid cancer                                                                                                                                    | Multiple                    | Marcia S Brose <sup>158</sup>        | 2014             | NCT00984282   | Phase III            | Randomized    | Double-blind | 2 arms |
| 155 | 43       | Regorafenib  | 1              | 2017                        | For metastatic colorectal cancer (mCRC) patients previously treated with fluoropyrimidines, oxaliplatin, and irinotecan, and those unsuitable for or previously treated with anti-VEGF or anti-EGFR (RAS wild-type) therapy                              | Multiple                    | Axel Grothey <sup>159</sup>          | 2013             | NCT01103323   | Phase III            | Randomized    | Double-blind | 2 arms |
| 156 | 43       | Regorafenib  | 2              | 2017                        | Indicated for locally advanced, unresectable, or metastatic gastrointestinal stromal tumor (GIST) patients who have previously received imatinib mesylate and sunitinib malate treatment                                                                 | Multiple                    | George D Demetri <sup>160</sup>      | 2021             | NCT01271712   | Phase III            | Randomized    | Double-blind | 2 arms |
| 157 | 43       | Regorafenib  | 3              | 2017                        | Indicated for hepatocellular carcinoma (HCC) patients who have previously received sorafenib treatment                                                                                                                                                   | Multiple                    | Jordi Bruix <sup>161</sup>           | 2016             | NCT01774344   | Phase III            | Randomized    | Double-blind | 2 arms |
| 158 | 44       | Lenvatinib   | 1              | 2018                        | Monotherapy is indicated for unresectable hepatocellular carcinoma patients who have not previously received systemic treatment                                                                                                                          | Multiple                    | Masatoshi Kudo <sup>162</sup>        | 2018             | NCT01761266   | Phase III            | Randomized    | None         | 2 arms |
| 159 | 44       | Lenvatinib   | 2              | 2020                        | Indicated for patients with progressive, locally advanced, or metastatic radioiodine-refractory differentiated thyroid cancer                                                                                                                            | Multiple                    | Martin Schlumberger <sup>163</sup>   | 2015             | NCT01321554   | Phase III            | Randomized    | Double-blind | 2 arms |
| 160 | 45       | Donafenib    | 1              | 2021                        | Indicated for unresectable hepatocellular carcinoma patients who have not previously received systemic treatment                                                                                                                                         | Multiple                    | Shukai Qin <sup>164</sup>            | 2021             | NCT02645981   | Phase III            | Randomized    | None         | 2 arms |
| 161 | 45       | Donafenib    | 2              | 2022                        | Indicated for patients with progressive, locally advanced, or metastatic radioiodine-refractory differentiated thyroid cancer                                                                                                                            | Multiple                    | Yansong Lin <sup>165</sup>           | 2023             | NCT03602495   | Phase III            | Randomized    | Double-blind | 2 arms |
| 162 | 46       | Trastuzumab  | 1              | 2002                        | Indicated for HER2-overexpressing metastatic breast cancer: in combination with paclitaxel or docetaxel, for metastatic breast cancer patients who have not received chemotherapy                                                                        | Multiple                    | DENNIS J. SLAMON <sup>166</sup>      | 2001             | not available | Phase III            | Randomized    | None         | 2 arms |

| No. | Drug No. | Generic name      | Indication No. | Year of indication approval | Indication                                                                                                                                                                                                                         | Single/Multiple Indications | Initial Pivotal Study (first author) | Publication Year | NCT                       | Clinical trial phase | Allocation    | Masking      | Arms          |
|-----|----------|-------------------|----------------|-----------------------------|------------------------------------------------------------------------------------------------------------------------------------------------------------------------------------------------------------------------------------|-----------------------------|--------------------------------------|------------------|---------------------------|----------------------|---------------|--------------|---------------|
| 163 | 46       | Trastuzumab       | 2              | 2002                        | Indicated for HER2-overexpressing metastatic breast cancer: as a monotherapy for metastatic breast cancer patients who have received one or more prior chemotherapy regimens                                                       | Multiple                    | not available                        | not available    | not available             | Phase III            | Nonrandomized | None         | 1 arm         |
| 164 | 46       | Trastuzumab       | 3              | 2002                        | Indicated for HER2-positive early breast cancer                                                                                                                                                                                    | Multiple                    | Edith A. Perez <sup>167</sup>        | 2011             | not available             | Phase III            | Randomized    | None         | 2 arms        |
| 165 | 46       | Trastuzumab       | 4              | 2012                        | Trastuzumab with capecitabine or 5-FU and cisplatin for HER2-overexpressing metastatic gastric or gastroesophageal junction adenocarcinoma patients without prior metastatic treatment                                             | Multiple                    | Yung-Jue Bang <sup>168</sup>         | 2010             | NCT01041404               | Phase III            | Randomized    | None         | 2 arms        |
| 166 | 47       | Apatinib          | 1              | 2014                        | Monotherapy is indicated for advanced gastric adenocarcinoma or gastroesophageal junction adenocarcinoma patients who have progressed or relapsed after receiving at least two prior lines of systemic chemotherapy                | Multiple                    | Jin Li <sup>169</sup>                | 2016             | NCT01512745               | Phase III            | Randomized    | Double-blind | 2 arms        |
| 167 | 47       | Apatinib          | 2              | 2020                        | Monotherapy for patients with advanced hepatocellular carcinoma who have failed or were intolerant to at least one prior line of systemic therapy                                                                                  | Multiple                    | Shukui Qin <sup>170</sup>            | 2021             | NCT02329860               | Phase III            | Randomized    | Double-blind | 2 arms        |
| 168 | 47       | Apatinib          | 3              | 2023                        | Apatinib combined with carrelizumab injection for first-line treatment of patients with unresectable or metastatic hepatocellular carcinoma                                                                                        | Multiple                    | Shukui Qin <sup>110</sup>            | 2023             | NCT03764293               | Phase III            | Randomized    | None         | 2 arms        |
| 169 | 48       | Disitamab Vedotin | 1              | 2021                        | For patients with HER2 overexpressing locally advanced or metastatic gastric cancer (including gastroesophageal junction adenocarcinoma) who have received at least two prior systemic chemotherapies                              | Multiple                    | Zhi Peng <sup>171</sup>              | 2021             | NCT03556345               | Phase II             | Nonrandomized | None         | 1 arm         |
| 170 | 48       | Disitamab Vedotin | 2              | 2021                        | Indicated for patients with locally advanced or metastatic urothelial carcinoma who have received prior platinum-based chemotherapy and have HER2 overexpression                                                                   | Multiple                    | Xinan Sheng <sup>172</sup>           | 2023             | NCT03809013 & NCT03507166 | Phase II             | Nonrandomized | None         | 1 arm         |
| 171 | 48       | Disitamab Vedotin | 3              | 2024                        | Disitamab Vedotin combined with toripalimab injection is indicated for perioperative treatment of muscle-invasive bladder cancer                                                                                                   | Multiple                    | Xinan Sheng <sup>173</sup>           | 2024             | NCT05297552               | Phase II             | Nonrandomized | None         | 1 arm         |
| 172 | 49       | Ramucirumab       | 1              | 2022                        | Ramucirumab combined with paclitaxel for the treatment of advanced gastric or gastroesophageal junction adenocarcinoma patients who have disease progression during or after fluoropyrimidine- or platinum-containing chemotherapy | Multiple                    | Hansjochen Wilke <sup>174</sup>      | 2014             | NCT01170663               | Phase III            | Randomized    | Double-blind | 2 arms        |
| 173 | 49       | Ramucirumab       | 2              | 2022                        | Monotherapy for the treatment of hepatocellular carcinoma patients who have previously received sorafenib treatment and have an alpha-fetoprotein level of $\geq 400$ ng/mL                                                        | Multiple                    | Andrew X Zhu <sup>175</sup>          | 2019             | NCT02435433               | Phase III            | Randomized    | Double-blind | 2 arms        |
| 174 | 50       | Imatinib          | 1              | 2002                        | Indicated for the treatment of chronic phase Philadelphia chromosome-positive chronic myelogenous leukemia (Ph+ CML)                                                                                                               | Multiple                    | Stephen G. O'Brien <sup>176</sup>    | 2003             | not available             | Phase III            | Randomized    | None         | 2 arms        |
| 175 | 50       | Imatinib          | 2              | 2002                        | Indicated for the treatment of accelerated phase Philadelphia chromosome-positive chronic myelogenous leukemia (Ph+ CML)                                                                                                           | Multiple                    | Moshe Talpaz <sup>177</sup>          | 2002             | not available             | Phase II             | Nonrandomized | None         | 2 arms        |
| 176 | 50       | Imatinib          | 3              | 2002                        | Indicated for the treatment of blast crisis Philadelphia chromosome-positive chronic myelogenous leukemia (Ph+ CML)                                                                                                                | Multiple                    | Charles L. Sawyers <sup>178</sup>    | 2003             | not available             | Phase II             | Nonrandomized | None         | 2 arms        |
| 177 | 50       | Imatinib          | 4              | 2003                        | Indicated for the treatment of adult patients with unresectable and/or metastatic malignant gastrointestinal stromal tumors (GIST)                                                                                                 | Multiple                    | GEORGE D. DEMETR <sup>179</sup>      | 2002             | not available             | Phase II             | Randomized    | None         | 2 arms        |
| 178 | 50       | Imatinib          | 5              | not available               | Imatinib combined with chemotherapy is indicated for the treatment of newly diagnosed Philadelphia chromosome-positive acute lymphoblastic leukemia (Ph+ ALL) in pediatric patients                                                | Multiple                    | Kirk R. Schultz <sup>180</sup>       | 2009             | not available             | Phase III            | Nonrandomized | None         | $\geq 3$ arms |
| 179 | 50       | Imatinib          | 6              | not available               | Indicated for the treatment of relapsed or refractory Philadelphia chromosome-positive acute lymphoblastic leukemia (Ph+ ALL) in adult patients                                                                                    | Multiple                    | Barbara Wassmann <sup>181</sup>      | 2004             | not available             | Phase II             | not available | None         | $\geq 3$ arms |
| 180 | 50       | Imatinib          | 7              | not available               | Indicated for the treatment of adult patients with hypereosinophilic syndrome (HES) and/or chronic eosinophilic leukemia (CEL) with FIP1L1-PDGFR $\alpha$ fusion kinase                                                            | Multiple                    | Michael C. Heinrich <sup>182</sup>   | 2008             | not available             | Phase II             | Nonrandomized | None         | 1 arm         |
| 181 | 50       | Imatinib          | 8              | not available               | Indicated for the treatment of adult patients with myelodysplastic syndromes/myeloproliferative diseases (MDS/MPD) associated with platelet-derived growth factor receptor (PDGFR) gene rearrangements                             | Multiple                    | Michael C. Heinrich <sup>182</sup>   | 2008             | not available             | Phase II             | Nonrandomized | None         | 1 arm         |

| No. | Drug No. | Generic name  | Indication No. | Year of indication approval | Indication                                                                                                                                                                                                                                                                                                       | Single/Multiple Indications | Initial Pivotal Study (first author) | Publication Year | NCT                                 | Clinical trial phase | Allocation    | Masking      | Arms   |
|-----|----------|---------------|----------------|-----------------------------|------------------------------------------------------------------------------------------------------------------------------------------------------------------------------------------------------------------------------------------------------------------------------------------------------------------|-----------------------------|--------------------------------------|------------------|-------------------------------------|----------------------|---------------|--------------|--------|
| 182 | 50       | Imatinib      | 9              | not available               | Indicated for the treatment of adult patients with aggressive systemic mastocytosis (ASM) without D816V c-Kit gene mutation or with unknown c-Kit gene mutation                                                                                                                                                  | Multiple                    | MichaelC.Heinrich <sup>182</sup>     | 2008             | not available                       | Phase II             | Nonrandomized | None         | 1 arm  |
| 183 | 50       | Imatinib      | 10             | 2010                        | Indicated for the treatment of unresectable, recurrent, or metastatic dermatofibrosarcoma protuberans (DFSP)                                                                                                                                                                                                     | Multiple                    | MichaelC.Heinrich <sup>182</sup>     | 2008             | not available                       | Phase II             | Nonrandomized | None         | 1 arm  |
| 184 | 50       | Imatinib      | 11             | not available               | Indicated for adjuvant treatment of adult patients with Kit (CD117)-positive GIST who have a significant risk of recurrence after surgical resection. Patients with very low and low recurrence risk should not receive this adjuvant treatment                                                                  | Multiple                    | Ronald P. DeMatteo <sup>183</sup>    | 2009             | NCT00041197                         | Phase III            | Randomized    | Double-blind | 2 arms |
| 185 | 51       | Sunitinib     | 1              | 2007                        | For advanced renal cell carcinoma (RCC) that cannot be treated with surgery                                                                                                                                                                                                                                      | Multiple                    | Robert J. Motzer <sup>184</sup>      | 2007             | NCT00083889                         | Phase III            | Randomized    | None         | 2 arms |
| 186 | 51       | Sunitinib     | 2              | 2007                        | Indicated for gastrointestinal stromal tumors (GIST) in patients who have failed or are intolerant to imatinib mesylate treatment                                                                                                                                                                                | Multiple                    | George D Demetri <sup>185</sup>      | 2006             | NCT00075218                         | Phase III            | Randomized    | Double-blind | 2 arms |
| 187 | 51       | Sunitinib     | 3              | 2013                        | Indicated for adult patients with unresectable, metastatic, well-differentiated, advanced pancreatic neuroendocrine tumors (pNET)                                                                                                                                                                                | Multiple                    | Eric Raymond <sup>186</sup>          | 2011             | NCT00428597                         | Phase III            | Randomized    | Double-blind | 2 arms |
| 188 | 52       | Avapritinib   | 1              | 2021                        | For the treatment of adult patients with unresectable or metastatic GIST harboring PDGFRA exon 18 (including D842V) mutations                                                                                                                                                                                    | Single                      | Michael C Heinrich <sup>187</sup>    | 2020             | NCT02508532                         | Phase I              | Nonrandomized | None         | 1 arm  |
| 189 | 53       | Ripretinib    | 1              | 2021                        | For the treatment of adult patients with advanced GIST who have received three or more tyrosine kinase inhibitors, including imatinib                                                                                                                                                                            | Single                      | Jean-Yves Blay <sup>188</sup>        | 2020             | NCT03353753                         | Phase III            | Randomized    | Double-blind | 2 arms |
| 190 | 54       | Surufatinib   | 1              | 2020                        | For the treatment of unresectable advanced or metastatic non-pancreatic G1/G2 non-functional neuroendocrine tumors                                                                                                                                                                                               | Single                      | Jianming Xu <sup>189</sup>           | 2020             | NCT02588170                         | Phase III            | Randomized    | Double-blind | 2 arms |
| 191 | 55       | Cetuximab     | 1              | 2019                        | For RAS wild-type metastatic colorectal cancer: combined with FOLFOX or FOLFIRI for first-line treatment, and with irinotecan after irinotecan-based therapy failure                                                                                                                                             | Multiple                    | Shukui Qin <sup>190</sup>            | 2018             | NCT01228734                         | Phase III            | Randomized    | None         | 2 arms |
| 192 | 55       | Cetuximab     | 2              | 2020                        | Cetuximab combined with platinum-based chemotherapy and fluoropyrimidine is indicated for first-line treatment of recurrent and/or metastatic head and neck squamous cell carcinoma                                                                                                                              | Multiple                    | Jan B. Vermorken <sup>191</sup>      | 2008             | NCT00122460                         | Phase III            | Randomized    | None         | 2 arms |
| 193 | 55       | Cetuximab     | 3              | 2022                        | Indicated for the treatment of head and neck squamous cell carcinoma: in combination with radiation therapy for locally advanced disease                                                                                                                                                                         | Multiple                    | James A. Bonner <sup>192</sup>       | 2006             | NCT00004227                         | Phase III            | Randomized    | None         | 2 arms |
| 194 | 56       | Fruquintinib  | 1              | 2018                        | Monotherapy for mCRC patients who have received chemotherapy and are unsuitable for anti-VEGF or anti-EGFR (RAS wild-type) therapies                                                                                                                                                                             | Single                      | Jin Li <sup>193</sup>                | 2018             | NCT02314819                         | Phase III            | Randomized    | Double-blind | 2 arms |
| 195 | 57       | Envafolelimab | 1              | 2021                        | For the treatment of adult patients with unresectable or metastatic MSI-H/dMMR advanced solid tumors, including:<br><br>Advanced colorectal cancer that progressed after fluoropyrimidine, oxaliplatin, and irinotecan treatment;<br><br>Other advanced solid tumors that progressed with no alternative options | Single                      | Jian Li <sup>194</sup>               | 2021             | NCT03667170                         | Phase II             | Nonrandomized | None         | 1 arm  |
| 196 | 58       | Larotrectinib | 1              | 2022                        | For adult and pediatric patients with solid tumors confirmed to have non-resistant NTRK fusions, who have locally advanced/metastatic disease or high surgical risk, and no satisfactory alternative treatment                                                                                                   | Single                      | David S Hong <sup>195</sup>          | 2018             | NCT02122913/NCT02637687/NCT02576431 | Phase I/II           | Nonrandomized | None         | 1 arm  |
| 197 | 59       | Pucotenlimab  | 1              | 2022                        | For unresectable or metastatic MSI-H or dMMR advanced solid tumors: including advanced colorectal cancer patients with progression after fluoropyrimidines, oxaliplatin, and irinotecan, and other advanced solid tumors with progression after at least one prior treatment and no satisfactory alternatives    | Multiple                    | Bo Zhang <sup>196</sup>              | 2023             | NCT03704246                         | Phase II             | Nonrandomized | None         | 1 arm  |
| 198 | 59       | Pucotenlimab  | 2              | 2022                        | Indicated for unresectable or metastatic melanoma patients who have failed prior systemic therapy                                                                                                                                                                                                                | Multiple                    | Chuanliang Cui <sup>197</sup>        | 2023             | NCT04749485                         | Phase II             | Nonrandomized | None         | 1 arm  |
| 199 | 60       | Pemigatinib   | 1              | 2022                        | For adult patients with advanced cholangiocarcinoma who have received systemic therapy and tested positive for FGFR2 fusions/rearrangements                                                                                                                                                                      | Single                      | Ghassan K Abou-Alfa <sup>198</sup>   | 2020             | NCT02924376                         | Phase II             | Nonrandomized | None         | 1 arm  |

| No. | Drug No. | Generic name   | Indication No. | Year of indication approval | Indication                                                                                                                                                                                                                                                               | Single/Multiple Indications | Initial Pivotal Study (first author)                               | Publication Year | NCT                       | Clinical trial phase | Allocation    | Masking      | Arms    |
|-----|----------|----------------|----------------|-----------------------------|--------------------------------------------------------------------------------------------------------------------------------------------------------------------------------------------------------------------------------------------------------------------------|-----------------------------|--------------------------------------------------------------------|------------------|---------------------------|----------------------|---------------|--------------|---------|
| 200 | 61       | Dasatinib      | 1              | 2011                        | For the treatment of adult patients with Ph+ CML in the chronic, accelerated, or blast phase who are resistant or intolerant to imatinib                                                                                                                                 | Single                      | Neil P. Shah <sup>199-201</sup>                                    | 2008/2014/2016   | NCT00123474               | Phase III            | Randomized    | None         | ≥3 arms |
| 201 | 62       | Nilotinib      | 1              | 2009                        | Indicated for adult patients with chronic or accelerated phase Philadelphia chromosome-positive chronic myelogenous leukemia (Ph+ CML) who are resistant or intolerant to prior treatment, including imatinib                                                            | Multiple                    | Hagop M. Kantarjian <sup>202</sup>                                 | 2010             | NCT00109707               | Phase II             | Nonrandomized | None         | 2 arms  |
| 202 | 62       | Nilotinib      | 2              | 2016                        | Indicated for adult patients with newly diagnosed chronic phase Philadelphia chromosome-positive chronic myelogenous leukemia (Ph+ CML)                                                                                                                                  | Multiple                    | Giuseppe Saglio <sup>203</sup> & Hagop M Kantarjian <sup>204</sup> | 2010/2011        | NCT00471497               | Phase III            | Randomized    | None         | ≥3 arms |
| 203 | 62       | Nilotinib      | 3              | 2019                        | Indicated for the treatment of chronic myelogenous leukemia in children aged 2 years and older                                                                                                                                                                           | Multiple                    | Nobuko Hijjya <sup>205</sup>                                       | 2019             | NCT01844765               | Phase II             | Nonrandomized | None         | 2 arms  |
| 204 | 63       | Olverembatinib | 1              | 2021                        | Indicated for adult patients with chronic or accelerated phase chronic myelogenous leukemia (CML) who are resistant to any tyrosine kinase inhibitor and diagnosed with T315I mutation using a validated testing method                                                  | Multiple                    | Qian Jiang <sup>206</sup>                                          | 2022             | NCT03883087 & NCT03883100 | Phase II             | Nonrandomized | None         | 1 arm   |
| 205 | 63       | Olverembatinib | 2              | 2023                        | Indicated for adult patients with chronic phase chronic myelogenous leukemia (CML) who are resistant to and/or intolerant of first- and second-generation tyrosine kinase inhibitors                                                                                     | Multiple                    | Qian Jiang <sup>206</sup>                                          | 2022             | NCT04126681               | Phase II             | Randomized    | None         | 2 arms  |
| 206 | 64       | Flumatinib     | 1              | 2019                        | For the treatment of adult patients with Ph+ CML in the chronic phase                                                                                                                                                                                                    | Single                      | Li Zhang <sup>207</sup>                                            | 2020             | NCT02204644               | Phase III            | Randomized    | None         | 2 arms  |
| 207 | 65       | Ibrutinib      | 1              | 2017                        | Indicated as monotherapy for the treatment of patients with mantle cell lymphoma who have received at least one prior therapy                                                                                                                                            | Multiple                    | Martin Dreyling <sup>208</sup>                                     | 2015             | NCT01646021               | Phase III            | Randomized    | None         | 2 arms  |
| 208 | 65       | Ibrutinib      | 2              | 2017                        | Indicated as monotherapy for the treatment of treatment-naïve and relapsed chronic lymphocytic leukemia/small lymphocytic lymphoma (CLL/SLL) patients                                                                                                                    | Multiple                    | J.C. Byrd <sup>209</sup>                                           | 2014             | NCT01578707               | Phase III            | Randomized    | None         | 2 arms  |
| 209 | 65       | Ibrutinib      | 3              | 2018                        | Indicated as monotherapy for the treatment of Waldenström's macroglobulinemia patients who have received at least one prior therapy, or as first-line treatment for patients with Waldenström's macroglobulinemia who are not suitable for chemotherapy or immunotherapy | Multiple                    | Steven P. Treon <sup>210</sup>                                     | 2015             | NCT01614821               | Phase II             | Nonrandomized | None         | 1 arm   |
| 210 | 65       | Ibrutinib      | 4              | 2018                        | Ibrutinib combined with rituximab is indicated for the treatment of patients with Waldenström's macroglobulinemia                                                                                                                                                        | Multiple                    | M.A. Dimopoulos <sup>211</sup>                                     | 2018             | NCT02165397               | Phase III            | Randomized    | Double-blind | 2 arms  |
| 211 | 66       | Zanubrutinib   | 1              | 2020                        | Indicated for adult patients with mantle cell lymphoma (MCL) who have received at least one prior therapy                                                                                                                                                                | Multiple                    | Yuqin Song <sup>212</sup>                                          | 2020             | NCT03206970               | Phase II             | Nonrandomized | None         | 1 arm   |
| 212 | 66       | Zanubrutinib   | 2              | 2020                        | Indicated for adult patients with chronic lymphocytic leukemia (CLL) or small lymphocytic lymphoma (SLL) who have received at least one prior therapy                                                                                                                    | Multiple                    | Wei Xu <sup>213</sup>                                              | 2020             | NCT03206918               | Phase II             | Nonrandomized | None         | 1 arm   |
| 213 | 66       | Zanubrutinib   | 3              | 2021                        | Indicated for adult patients with Waldenström's macroglobulinemia (WM) who have received at least one prior therapy                                                                                                                                                      | Multiple                    | Gang An <sup>214</sup>                                             | 2021             | NCT03332173               | Phase II             | Nonrandomized | None         | 1 arm   |
| 214 | 66       | Zanubrutinib   | 4              | 2023                        | Indicated as monotherapy for treatment-naïve adult patients with chronic lymphocytic leukemia (CLL) or small lymphocytic lymphoma (SLL)                                                                                                                                  | Multiple                    | Constantine S Tam <sup>215</sup>                                   | 2022             | NCT03336333               | Phase III            | Randomized    | None         | 2 arms  |
| 215 | 67       | Orelabrutinib  | 1              | 2020                        | Indicated for adult patients with mantle cell lymphoma (MCL) who have received at least one prior therapy                                                                                                                                                                | Multiple                    | Li-Juan Deng <sup>216</sup>                                        | 2023             | NCT03494179               | Phase II             | Randomized    | None         | 2 arms  |
| 216 | 67       | Orelabrutinib  | 2              | 2020                        | Indicated for adult patients with chronic lymphocytic leukemia (CLL) or small lymphocytic lymphoma (SLL) who have received at least one prior therapy                                                                                                                    | Multiple                    | Wei Xu <sup>217</sup>                                              | 2022             | NCT03493217               | Phase II             | Nonrandomized | None         | 1 arm   |
| 217 | 67       | Orelabrutinib  | 3              | 2023                        | Indicated for adult patients with marginal zone lymphoma (MZL) who have received at least one prior therapy                                                                                                                                                              | Multiple                    | Lijuan Deng <sup>218</sup>                                         | 2023             | NCT03797456               | Phase II             | Nonrandomized | None         | 1 arm   |
| 218 | 68       | Bortezomib     | 1              | 2005                        | Bortezomib + melphalan + prednisone (MP regimen) for untreated multiple myeloma patients ineligible for high-dose chemotherapy and stem cell transplantation                                                                                                             | Multiple                    | APEX trial <sup>219</sup>                                          | 2003             | NCT00048230               | Phase III            | Randomized    | None         | 2 arms  |
| 219 | 68       | Bortezomib     | 2              | 2005                        | Indicated for the treatment of relapsed multiple myeloma patients who have received at least one prior therapy                                                                                                                                                           | Multiple                    | Jesús F. San Miguel <sup>220</sup>                                 | 2008             | NCT00111319               | Phase III            | Randomized    | None         | 2 arms  |

| No. | Drug No. | Generic name | Indication No. | Year of indication approval | Indication                                                                                                                                                                                                                                                         | Single/Multiple Indications | Initial Pivotal Study (first author) | Publication Year | NCT         | Clinical trial phase | Allocation    | Masking      | Arms    |
|-----|----------|--------------|----------------|-----------------------------|--------------------------------------------------------------------------------------------------------------------------------------------------------------------------------------------------------------------------------------------------------------------|-----------------------------|--------------------------------------|------------------|-------------|----------------------|---------------|--------------|---------|
| 220 | 68       | Bortezomib   | 3              | 2009                        | Indicated for the treatment of relapsed or refractory mantle cell lymphoma (MCL) patients who have received at least one prior therapy                                                                                                                             | Multiple                    | Richard I. Fisher <sup>221</sup>     | 2006             | NCT00063713 | Phase II             | Nonrandomized | None         | 1 arm   |
| 221 | 68       | Bortezomib   | 4              | 2018                        | Bortezomib, in combination with rituximab, cyclophosphamide, doxorubicin, and prednisone, is indicated for the treatment of previously untreated adult patients with mantle cell lymphoma (MCL) who are not candidates for hematopoietic stem cell transplantation | Multiple                    | Tadeusz Robak <sup>222</sup>         | 2015             | NCT00722137 | Phase III            | Randomized    | None         | 2 arms  |
| 222 | 69       | Carfilzomib  | 1              | 2021                        | With dexamethasone for adults with relapsed/refractory multiple myeloma after two or more treatments                                                                                                                                                               | Single                      | Juan Du <sup>223</sup>               | 2021             | NCT03029234 | Phase III            | Nonrandomized | None         | 1 arm   |
| 223 | 70       | Ixazomib     | 1              | 2018                        | With lenalidomide and dexamethasone for adults with multiple myeloma after at least one prior treatment                                                                                                                                                            | Single                      | P. Moreau <sup>224</sup>             | 2016             | NCT01564537 | Phase III            | Randomized    | Double-blind | 2 arms  |
| 224 | 71       | Lenalidomide | 1              | 2013                        | Lenalidomide in combination with dexamethasone is indicated for the treatment of adult patients with multiple myeloma who have received at least one prior therapy                                                                                                 | Multiple                    | Donna M. Weber <sup>225</sup>        | 2007             | NCT00056160 | Phase III            | Randomized    | Double-blind | 2 arms  |
| 225 | 71       | Lenalidomide | 2              | 2017                        | Lenalidomide in combination with dexamethasone is indicated for the treatment of adult patients with multiple myeloma who have not received prior treatment and are not candidates for transplantation                                                             | Multiple                    | Lotfi Benboubker <sup>226</sup>      | 2014             | NCT00689936 | Phase III            | Randomized    | None         | ≥3 arms |
| 226 | 71       | Lenalidomide | 3              | 2020                        | Lenalidomide in combination with rituximab is indicated for the treatment of adult patients with follicular lymphoma grades 1–3a who have received prior treatment                                                                                                 | Multiple                    | John P. Leonard <sup>227</sup>       | 2019             | NCT01938001 | Phase III            | Randomized    | Double-blind | 2 arms  |
| 227 | 72       | Pomalidomide | 1              | 2020                        | Pomalidomide + dexamethasone for adults with relapsed/refractory multiple myeloma after ≥2 treatments and progression within 60 days                                                                                                                               | Single                      | Jesus San Miguel <sup>228</sup>      | 2013             | NCT01311687 | Phase III            | Randomized    | None         | 2 arms  |
| 228 | 73       | Daratumumab  | 1              | 2019                        | Monotherapy is indicated for the treatment of adult patients with relapsed or refractory multiple myeloma who have previously received treatment including proteasome inhibitors and immunomodulatory agents, with disease progression at the last treatment       | Multiple                    | Sagar Lonial <sup>229</sup>          | 2016             | NCT01985126 | Phase II             | Randomized    | None         | 1 arm   |
| 229 | 73       | Daratumumab  | 2              | 2021                        | Daratumumab combined with lenalidomide and dexamethasone, or with bortezomib and dexamethasone, is indicated for the treatment of adult patients with multiple myeloma who have previously received at least one line of therapy                                   | Multiple                    | Antonio Palumbo <sup>230</sup>       | 2019             | NCT02136134 | Phase III            | Randomized    | None         | 2 arms  |
| 230 | 73       | Daratumumab  | 3              | 2021                        | Daratumumab combined with lenalidomide and dexamethasone, or with bortezomib, melphalan, and prednisone, is indicated for the treatment of newly diagnosed multiple myeloma adult patients who are not candidates for autologous stem cell transplantation         | Multiple                    | Maria-Victoria Mateos <sup>231</sup> | 2019             | NCT02195479 | Phase III            | Randomized    | None         | 2 arms  |
| 231 | 74       | Selinexor    | 1              | 2021                        | With dexamethasone for adults with relapsed/refractory multiple myeloma resistant to proteasome inhibitor, immunomodulator, and anti-CD38 antibody                                                                                                                 | Single                      | Dan T. Vogt <sup>232</sup>           | 2018             | NCT02336815 | Phase II             | Nonrandomized | None         | 1 arm   |
| 232 | 75       | Gilteritinib | 1              | 2021                        | For adults with relapsed/refractory AML confirmed to have FLT3 mutation by validated testing                                                                                                                                                                       | Single                      | A.E. Perl <sup>233</sup>             | 2019             | NCT02421939 | Phase III            | Randomized    | None         | 2 arms  |
| 233 | 76       | Venetoclax   | 1              | 2020                        | With azacitidine for newly diagnosed AML adults ineligible for intensive induction chemotherapy due to comorbidities or age ≥75                                                                                                                                    | Single                      | C.D. DiNardo <sup>234</sup>          | 2020             | NCT02993523 | Phase III            | Randomized    | Double-blind | 2 arms  |
| 234 | 77       | Ivosidenib   | 1              | 2022                        | For adults with relapsed/refractory AML with an IDH1 mutation                                                                                                                                                                                                      | Single                      | Kelly J. Norsworthy <sup>235</sup>   | 2019             | NCT02074839 | Phase II             | Nonrandomized | None         | 1 arm   |
| 235 | 78       | Blinatumomab | 1              | 2020                        | Indicated for the treatment of adult patients with relapsed or refractory precursor B-cell acute lymphoblastic leukemia                                                                                                                                            | Multiple                    | Hagop Kantarjian <sup>236</sup>      | 2017             | NCT02013167 | Phase III            | Randomized    | None         | 2 arms  |
| 236 | 78       | Blinatumomab | 2              | 2022                        | Indicated for the treatment of pediatric patients with relapsed or refractory CD19-positive precursor B-cell acute lymphoblastic leukemia                                                                                                                          | Multiple                    | Franco Locatelli <sup>237</sup>      | 2021             | NCT02393859 | Phase III            | Randomized    | None         | 2 arms  |
| 237 | 79       | Zimberelimab | 1              | 2021                        | Indicated for adult patients with relapsed or refractory classic Hodgkin lymphoma who have received at least two lines of systemic chemotherapy                                                                                                                    | Multiple                    | Ningjing Lin <sup>238</sup>          | 2021             | NCT03655483 | Phase II             | Nonrandomized | None         | 1 arm   |
| 238 | 79       | Zimberelimab | 2              | 2023                        | Indicated for patients with relapsed or metastatic cervical cancer who have failed platinum-based chemotherapy and are PD-L1 positive (CPS≥1)                                                                                                                      | Multiple                    | Lingfang Xia <sup>239</sup>          | 2023             | NCT03972722 | Phase II             | Nonrandomized | None         | 1 arm   |

| No. | Drug No. | Generic name          | Indication No. | Year of indication approval | Indication                                                                                                                                                                                                                                                                                                                                                            | Single/Multiple Indications | Initial Pivotal Study (first author)  | Publication Year | NCT         | Clinical trial phase | Allocation    | Masking      | Arms   |
|-----|----------|-----------------------|----------------|-----------------------------|-----------------------------------------------------------------------------------------------------------------------------------------------------------------------------------------------------------------------------------------------------------------------------------------------------------------------------------------------------------------------|-----------------------------|---------------------------------------|------------------|-------------|----------------------|---------------|--------------|--------|
| 239 | 80       | Rituximab             | 1              | 2000                        | Indicated for previously untreated CD20-positive stage III-IV follicular non-Hodgkin lymphoma patients, to be used in combination with chemotherapy                                                                                                                                                                                                                   | Multiple                    | Gilles Salles <sup>240</sup>          | 2011             | NCT00140582 | Phase III            | Randomized    | None         | 2 arms |
| 240 | 80       | Rituximab             | 2              | 2000                        | Indicated for the treatment of relapsed or chemotherapy-resistant follicular lymphoma                                                                                                                                                                                                                                                                                 | Multiple                    | Marinus H. J. van Oers <sup>241</sup> | 2006             | NCT00004179 | Phase III            | Randomized    | None         | 2 arms |
| 241 | 80       | Rituximab             | 3              | 2000                        | CD20-positive diffuse large B-cell lymphoma (DLBCL) should be treated in combination with standard CHOP chemotherapy (cyclophosphamide, doxorubicin, vincristine, and prednisone) for 8 cycles                                                                                                                                                                        | Multiple                    | Annalisa Chiappella <sup>242</sup>    | 2017             | NCT00499018 | Phase III            | Randomized    | None         | 2 arms |
| 242 | 80       | Rituximab             | 4              | 2019                        | Monotherapy is used for maintenance treatment of follicular lymphoma patients who have achieved complete or partial remission after rituximab combined with chemotherapy                                                                                                                                                                                              | Multiple                    | Gilles Salles <sup>240</sup>          | 2011             | NCT00140582 | Phase III            | Randomized    | None         | 2 arms |
| 243 | 80       | Rituximab             | 5              | 2019                        | Rituximab combined with fludarabine and cyclophosphamide (FC) is used for the treatment of previously untreated or relapsed/refractory chronic lymphocytic leukemia (CLL) patients                                                                                                                                                                                    | Multiple                    | M Hallek <sup>243</sup>               | 2010             | NCT00281918 | Phase III            | Randomized    | None         | 2 arms |
| 244 | 81       | Ripertamab            | 1              | 2022                        | For newly diagnosed adults with CD20+ DLBCL and IPI 0-2, in combination with standard CHOP chemotherapy                                                                                                                                                                                                                                                               | Single                      | YuankaiShi <sup>244</sup>             | 2022             | NCT02772822 | Phase III            | Randomized    | Single-blind | 2 arms |
| 245 | 82       | Zuberitamab           | 1              | 2023                        | For adults with CD20+ diffuse large B-cell lymphoma, in combination with standard CHOP chemotherapy                                                                                                                                                                                                                                                                   | Single                      | Not Available                         | Not Available    | NCT03485118 | Phase III            | Randomized    | Double-blind | 2 arms |
| 246 | 83       | Obinutuzumab          | 1              | 2021                        | In combination with chemotherapy for newly diagnosed stage II with large tumors, stage III, or stage IV follicular lymphoma, followed by obinutuzumab maintenance after partial remission                                                                                                                                                                             | Single                      | R. Marcus <sup>245</sup>              | 2017             | NCT01332968 | Phase III            | Randomized    | None         | 2 arms |
| 247 | 84       | Polatuzumab Vedotin   | 1              | 2023                        | Polatuzumab Vedotin combined with rituximab, cyclophosphamide, doxorubicin, and prednisone is indicated for the treatment of previously untreated adult patients with diffuse large B-cell lymphoma (DLBCL)                                                                                                                                                           | Multiple                    | H. Tilly <sup>246</sup>               | 2021             | NCT03274492 | Phase III            | Randomized    | Double-blind | 2 arms |
| 248 | 84       | Polatuzumab Vedotin   | 2              | 2023                        | Polatuzumab Vedotin combined with bendamustine and rituximab is indicated for the treatment of adult patients with relapsed or refractory diffuse large B-cell lymphoma (DLBCL) who are not eligible for hematopoietic stem cell transplantation. Conditional approval was based on complete response rates and duration of response for relapsed or refractory DLBCL | Multiple                    | Laurie H. Sehn <sup>247,248</sup>     | 2019/2020        | NCT02257567 | Phase II             | Randomized    | None         | 2 arms |
| 249 | 85       | Brentuximab Vedotin   | 1              | 2020                        | Indicated for the treatment of adult patients with CD30-positive lymphoma: relapsed or refractory systemic anaplastic large cell lymphoma (sALCL)                                                                                                                                                                                                                     | Multiple                    | Barbara Pro <sup>249</sup>            | 2017             | NCT00866047 | Phase II             | Nonrandomized | None         | 1 arm  |
| 250 | 85       | Brentuximab Vedotin   | 2              | 2020                        | Indicated for the treatment of adult patients with CD30-positive lymphoma: relapsed or refractory classical Hodgkin lymphoma (cHL)                                                                                                                                                                                                                                    | Multiple                    | Robert Chen <sup>250</sup>            | 2016             | NCT00848926 | Phase II             | Nonrandomized | None         | 1 arm  |
| 251 | 85       | Brentuximab Vedotin   | 3              | 2021                        | Indicated for adult patients with CD30-positive primary cutaneous anaplastic large cell lymphoma (pcALCL) or mycosis fungoides (MF) who have previously received systemic therapy                                                                                                                                                                                     | Multiple                    | H Miles Prince <sup>251</sup>         | 2017             | NCT01578499 | Phase III            | Randomized    | None         | 2 arms |
| 252 | 86       | Inotuzumab Ozogamicin | 1              | 2021                        | For adults with relapsed/refractory precursor B-cell acute lymphoblastic leukemia                                                                                                                                                                                                                                                                                     | Single                      | Hagop M. Kantarjian <sup>252</sup>    | 2016             | NCT01564784 | Phase III            | Randomized    | None         | 2 arms |
| 253 | 87       | Chidamide             | 1              | 2014                        | Indicated for adult patients with relapsed or refractory peripheral T-cell lymphoma (PTCL) who have received at least one prior systemic chemotherapy                                                                                                                                                                                                                 | Multiple                    | Y. Shi <sup>253</sup>                 | 2015             | NCT05833724 | Phase II             | Nonrandomized | None         | 1 arm  |
| 254 | 87       | Chidamide             | 2              | 2019                        | Chidamide + aromatase inhibitors is indicated for postmenopausal HR-positive, HER2-negative locally advanced or metastatic breast cancer patients with recurrence or progression after endocrine therapy                                                                                                                                                              | Multiple                    | Zefei Jiang <sup>254</sup>            | 2019             | NCT02482753 | Phase III            | Randomized    | Double-blind | 2 arms |
| 255 | 88       | Linperlisib           | 1              | 2022                        | For adults with relapsed or refractory follicular lymphoma who have received at least two prior systemic therapies                                                                                                                                                                                                                                                    | Single                      | Tingyu Wang <sup>255</sup>            | 2023             | NCT04370405 | Phase II             | Nonrandomized | None         | 1 arm  |
| 256 | 89       | Duvelisib             | 1              | 2022                        | For adults with relapsed or refractory follicular lymphoma who have received at least two prior systemic therapies                                                                                                                                                                                                                                                    | Single                      | Not Available                         | Not Available    | NCT01882803 | Phase II             | Nonrandomized | None         | 1 arm  |
| 257 | 90       | Ruxolitinib           | 1              | 2017                        | For adults with intermediate- or high-risk primary myelofibrosis (PMF), post-polycythemia vera myelofibrosis (PPV-MF), or post-essential thrombocythemia myelofibrosis (PET-MF), to treat disease-related splenomegaly or symptoms                                                                                                                                    | Single                      | Ruben A. Mesa <sup>256</sup>          | 2013             | NCT00952289 | Phase III            | Randomized    | Double-blind | 2 arms |

| No. | Drug No. | Generic name  | Indication No. | Year of indication approval | Indication                                                                                                                                                                                                                                                                                                                                                                               | Single/Multiple Indications | Initial Pivotal Study (first author) | Publication Year | NCT         | Clinical trial phase | Allocation | Masking      | Arms   |
|-----|----------|---------------|----------------|-----------------------------|------------------------------------------------------------------------------------------------------------------------------------------------------------------------------------------------------------------------------------------------------------------------------------------------------------------------------------------------------------------------------------------|-----------------------------|--------------------------------------|------------------|-------------|----------------------|------------|--------------|--------|
| 258 | 91       | Mogamulizumab | 1              | 2022                        | Indicated for relapsed/refractory Sézary syndrome or advanced (Stage III/IV) mycosis fungoides in adults who have received systemic therapy                                                                                                                                                                                                                                              | Single                      | Youn H Kim <sup>257</sup>            | 2018             | NCT01728805 | Phase III            | Randomized | None         | 2 arms |
| 259 | 92       | Siltuximab    | 1              | 2021                        | Indicated for the treatment of adult patients with multicentric Castleman disease (MCD) who are human immunodeficiency virus (HIV)-negative and human herpesvirus-8 (HHV-8)-negative                                                                                                                                                                                                     | Single                      | Frits van Rhee <sup>258</sup>        | 2014             | NCT01024036 | Phase II             | Randomized | Double-blind | 2 arms |
| 260 | 93       | Pazopanib     | 1              | 2017                        | For first-line and post-cytokine therapy treatment of advanced renal cell carcinoma (RCC)                                                                                                                                                                                                                                                                                                | Single                      | Cora N. Sternberg <sup>259</sup>     | 2010             | NCT00334282 | Phase III            | Randomized | Double-blind | 2 arms |
| 261 | 94       | Axitinib      | 1              | 2015                        | For adult patients with advanced renal cell carcinoma (RCC) who have progressed following prior treatment with one tyrosine kinase inhibitor (TKI) or cytokine therapy                                                                                                                                                                                                                   | Single                      | Brian I Rini <sup>260</sup>          | 2011             | NCT00678392 | Phase III            | Randomized | None         | 2 arms |
| 262 | 95       | Abiraterone   | 1              | 2015                        | Abiraterone, in combination with prednisone or prednisolone, is indicated for the treatment of metastatic castration-resistant prostate cancer (mCRPC)                                                                                                                                                                                                                                   | Multiple                    | Johann S. de Bono <sup>261</sup>     | 2011             | NCT00638690 | Phase III            | Randomized | Double-blind | 2 arms |
| 263 | 95       | Abiraterone   | 2              | 2018                        | Abiraterone acetate, in combination with prednisone or prednisolone, is indicated for the treatment of newly diagnosed high-risk metastatic endocrine-sensitive prostate cancer, including patients who have not received endocrine therapy or have received endocrine therapy for no more than 3 months                                                                                 | Multiple                    | Karim Fizazi <sup>262</sup>          | 2017             | NCT01715285 | Phase III            | Randomized | Double-blind | 2 arms |
| 264 | 96       | Apalutamide   | 1              | 2019                        | Indicated for the treatment of adult patients with high-risk non-metastatic castration-resistant prostate cancer (NM-CRPC)                                                                                                                                                                                                                                                               | Multiple                    | Matthew R. Smith <sup>263</sup>      | 2018             | NCT01946204 | Phase III            | Randomized | Double-blind | 2 arms |
| 265 | 96       | Apalutamide   | 2              | 2020                        | Indicated for the treatment of adult patients with metastatic hormone-sensitive prostate cancer (mHSPC)                                                                                                                                                                                                                                                                                  | Multiple                    | Kim N. Chi <sup>264</sup>            | 2019             | NCT02489318 | Phase III            | Randomized | Double-blind | 2 arms |
| 266 | 97       | Enzalutamide  | 1              | 2019                        | Indicated for the treatment of adult patients with metastatic castration-resistant prostate cancer (mCRPC) who are asymptomatic or mildly symptomatic and have not received chemotherapy after failure of androgen deprivation therapy                                                                                                                                                   | Multiple                    | T.M. Beer <sup>265</sup>             | 2014             | NCT01212991 | Phase III            | Randomized | Double-blind | 2 arms |
| 267 | 97       | Enzalutamide  | 2              | 2020                        | Indicated for adult patients with non-metastatic castration-resistant prostate cancer (NM-CRPC) at high risk of metastasis                                                                                                                                                                                                                                                               | Multiple                    | Maha Hussain <sup>266</sup>          | 2018             | NCT02003924 | Phase III            | Randomized | Double-blind | 2 arms |
| 268 | 97       | Enzalutamide  | 3              | 2024                        | Indicated for metastatic hormone-sensitive prostate cancer (mHSPC)                                                                                                                                                                                                                                                                                                                       | Multiple                    | Andrew J. Armstrong <sup>267</sup>   | 2019             | NCT02677896 | Phase III            | Randomized | Double-blind | 2 arms |
| 269 | 98       | Darolutamide  | 1              | 2021                        | Indicated for the treatment of adult patients with high-risk non-metastatic castration-resistant prostate cancer (NM-CRPC)                                                                                                                                                                                                                                                               | Multiple                    | Karim Fizazi <sup>268</sup>          | 2019             | NCT02200614 | Phase III            | Randomized | Double-blind | 2 arms |
| 270 | 98       | Darolutamide  | 2              | 2023                        | Darolutamide in combination with docetaxel is indicated for the treatment of adult patients with metastatic hormone-sensitive prostate cancer (mHSPC)                                                                                                                                                                                                                                    | Multiple                    | Matthew R. Smith <sup>269</sup>      | 2022             | NCT02799602 | Phase III            | Randomized | Double-blind | 2 arms |
| 271 | 99       | Rezvilutamide | 1              | 2022                        | Indicated for the treatment of patients with metastatic hormone-sensitive prostate cancer (mHSPC) with high tumor burden                                                                                                                                                                                                                                                                 | Single                      | Wejje Gu <sup>270</sup>              | 2022             | NCT03520478 | Phase III            | Randomized | None         | 2 arms |
| 272 | 100      | Olaparib      | 1              | 2018                        | Monotherapy is indicated for the maintenance treatment of adult patients with platinum-sensitive recurrent epithelial ovarian cancer, fallopian tube cancer, or primary peritoneal cancer who have achieved complete or partial response after platinum-based chemotherapy                                                                                                               | Multiple                    | Eric Pujade-Lauraine <sup>271</sup>  | 2017             | NCT01874353 | Phase III            | Randomized | Double-blind | 2 arms |
| 273 | 100      | Olaparib      | 2              | 2019                        | Indicated for the maintenance treatment of adult patients with germline or somatic BRCA-mutated advanced epithelial ovarian cancer, fallopian tube cancer, or primary peritoneal cancer who have achieved complete or partial response after first-line platinum-based chemotherapy                                                                                                      | Multiple                    | K. Moore <sup>272</sup>              | 2018             | NCT01844986 | Phase III            | Randomized | Double-blind | 2 arms |
| 274 | 100      | Olaparib      | 3              | 2021                        | Indicated for the treatment of adult patients with metastatic castration-resistant prostate cancer (mCRPC) who carry germline or somatic BRCA mutations (gBRCAm or sBRCAm) and have previously failed treatment, including with a novel endocrine therapy                                                                                                                                | Multiple                    | J. de Bono <sup>273</sup>            | 2020             | NCT02987543 | Phase III            | Randomized | None         | 2 arms |
| 275 | 100      | Olaparib      | 4              | 2022                        | Olaparib in combination with bevacizumab is indicated for the maintenance treatment of adult patients with advanced epithelial ovarian cancer, fallopian tube cancer, or primary peritoneal cancer who are homologous recombination repair-deficient (HRD-positive) and have achieved a complete or partial response to first-line platinum-based chemotherapy combined with bevacizumab | Multiple                    | I. Ray-Coquard <sup>274</sup>        | 2019             | NCT02477644 | Phase III            | Randomized | Double-blind | 2 arms |

| No. | Drug No. | Generic name           | Indication No. | Year of indication approval | Indication                                                                                                                                                                                                                                                                                                                                                                                                                                                               | Single/Multiple Indications | Initial Pivotal Study (first author) | Publication Year | NCT           | Clinical trial phase | Allocation | Masking      | Arms   |
|-----|----------|------------------------|----------------|-----------------------------|--------------------------------------------------------------------------------------------------------------------------------------------------------------------------------------------------------------------------------------------------------------------------------------------------------------------------------------------------------------------------------------------------------------------------------------------------------------------------|-----------------------------|--------------------------------------|------------------|---------------|----------------------|------------|--------------|--------|
| 276 | 101      | Trastuzumab Emtansine  | 1              | 2020                        | Adjuvant treatment for breast cancer: Monotherapy is indicated for HER2-positive early breast cancer patients who have residual invasive disease after receiving neoadjuvant therapy with taxane combined with trastuzumab                                                                                                                                                                                                                                               | Multiple                    | G. von Minckwitz <sup>275</sup>      | 2018             | NCT01772472   | Phase III            | Randomized | None         | 2 arms |
| 277 | 101      | Trastuzumab Emtansine  | 2              | 2021                        | Metastatic breast cancer treatment: Monotherapy is indicated for HER2-positive, unresectable locally advanced or metastatic breast cancer patients who have received treatment with taxane and trastuzumab. The patient should meet one of the following conditions: previously received treatment for locally advanced or metastatic breast cancer, or experienced disease recurrence within 6 months after adjuvant treatment or during the course of adjuvant therapy | Multiple                    | Sunil Verma <sup>276</sup>           | 2012             | NCT00829166   | Phase III            | Randomized | None         | 2 arms |
| 278 | 102      | Pertuzumab             | 1              | 2018                        | Indicated for adjuvant treatment in HER2-positive early breast cancer patients with high recurrence risk, in combination with trastuzumab and chemotherapy                                                                                                                                                                                                                                                                                                               | Multiple                    | Gunter von Minckwitz <sup>277</sup>  | 2017             | NCT01358877   | Phase III            | Randomized | Double-blind | 2 arms |
| 279 | 102      | Pertuzumab             | 2              | 2019                        | Indicated for neoadjuvant treatment in HER2-positive, locally advanced, inflammatory, or early breast cancer patients (with tumors >2 cm or lymph node-positive), in combination with trastuzumab and chemotherapy, as part of the overall treatment plan for early breast cancer                                                                                                                                                                                        | Multiple                    | Zhimin Shao <sup>278</sup>           | 2019             | NCT02586025   | Phase III            | Randomized | Double-blind | 2 arms |
| 280 | 102      | Pertuzumab             | 3              | 2019                        | Pertuzumab, in combination with trastuzumab and docetaxel, is indicated for HER2-positive patients with metastatic disease who have not previously received HER2-targeted treatment or chemotherapy for metastatic or unresectable locally recurrent breast cancer                                                                                                                                                                                                       | Multiple                    | Sandra M. Swain <sup>279</sup>       | 2015             | NCT00567190   | Phase III            | Randomized | Double-blind | 2 arms |
| 281 | 103      | Trastuzumab Deruxtecan | 1              | 2023                        | Monotherapy is indicated for the treatment of adult patients with unresectable or metastatic HER2-positive breast cancer who have previously received one or more HER2-targeted therapies                                                                                                                                                                                                                                                                                | Multiple                    | J. Cortés <sup>280</sup>             | 2022             | NCT03529110   | Phase III            | Randomized | None         | 2 arms |
| 282 | 103      | Trastuzumab Deruxtecan | 2              | 2023                        | Monotherapy is indicated for the treatment of adult patients with unresectable or metastatic HER2-low (IHC1+ or IHC2+/ISH-) breast cancer who have previously received at least one systemic therapy during the metastatic disease phase, or who experienced disease recurrence within 6 months after adjuvant chemotherapy or during the course of adjuvant chemotherapy                                                                                                | Multiple                    | S. Modi <sup>281</sup>               | 2022             | NCT03734029   | Phase III            | Randomized | None         | 2 arms |
| 283 | 104      | Inetamab               | 1              | 2020                        | Indicated for the treatment of HER2-positive metastatic breast cancer (MBC) in combination with vinorelbine in patients who have previously received one or more prior chemotherapy regimens                                                                                                                                                                                                                                                                             | Single                      | Bian Li <sup>282</sup>               | 2020             | Not Available | Phase III            | Randomized | None         | 2 arms |
| 284 | 105      | Lapatinib              | 1              | 2013                        | For HER2-overexpressing advanced or metastatic breast cancer (MBC), in combination with capecitabine, previously treated with anthracyclines, taxanes, and trastuzumab                                                                                                                                                                                                                                                                                                   | Single                      | Charles E. Geyer <sup>283</sup>      | 2006             | NCT00078572   | Phase III            | Randomized | None         | 2 arms |
| 285 | 106      | Pyrotinib              | 1              | 2018                        | Pyrotinib in combination with capecitabine is indicated for the treatment of HER2-positive, recurrent or metastatic breast cancer patients who have not received or have previously received trastuzumab. Prior to the use of pyrotinib, patients should have received anthracycline or taxane-based chemotherapy                                                                                                                                                        | Multiple                    | Fei Ma <sup>284</sup>                | 2019             | NCT02422199   | Phase II             | Randomized | None         | 2 arms |
| 286 | 106      | Pyrotinib              | 2              | 2022                        | Pyrotinib in combination with trastuzumab and docetaxel is indicated for neoadjuvant treatment of HER2-positive early or locally advanced breast cancer patients                                                                                                                                                                                                                                                                                                         | Multiple                    | Jiong Wu <sup>285</sup>              | 2022             | NCT03588091   | Phase III            | Randomized | Double-blind | 2 arms |
| 287 | 106      | Pyrotinib              | 3              | 2023                        | Pyrotinib in combination with trastuzumab and docetaxel is indicated for the treatment of HER2-positive, advanced-stage, recurrent or metastatic breast cancer patients who have not previously received anti-HER2 therapy                                                                                                                                                                                                                                               | Multiple                    | Fei Ma <sup>286</sup>                | 2023             | NCT03863223   | Phase III            | Randomized | Double-blind | 2 arms |
| 288 | 107      | Neratinib              | 1              | 2020                        | For adult patients with HER2-positive early breast cancer, following enhanced adjuvant therapy after trastuzumab-based treatment                                                                                                                                                                                                                                                                                                                                         | Single                      | Miguel Martin <sup>287</sup>         | 2017             | NCT00878709   | Phase III            | Randomized | Double-blind | 2 arms |
| 289 | 108      | Palbociclib            | 1              | 2018                        | For HR+/HER2- locally advanced or metastatic breast cancer (MBC) in postmenopausal women, in combination with an aromatase inhibitor (AI) as first-line endocrine therapy                                                                                                                                                                                                                                                                                                | Single                      | Richard S. Finn <sup>288</sup>       | 2016             | NCT01740427   | Phase III            | Randomized | Double-blind | 2 arms |
| 290 | 109      | Abemaciclib            | 1              | 2020                        | Abemaciclib in combination with aromatase inhibitors is indicated as initial endocrine therapy for postmenopausal HR-positive, HER2-negative, locally advanced or metastatic breast cancer patients                                                                                                                                                                                                                                                                      | Multiple                    | Stephen Johnston <sup>289</sup>      | 2019             | NCT02246621   | Phase III            | Randomized | Double-blind | 2 arms |
| 291 | 109      | Abemaciclib            | 2              | 2020                        | Abemaciclib in combination with fulvestrant is indicated for HR-positive, HER2-negative, locally advanced or metastatic breast cancer patients who have progressed after previous endocrine therapy                                                                                                                                                                                                                                                                      | Multiple                    | George W. Sledge <sup>290</sup>      | 2019             | NCT02107703   | Phase III            | Randomized | Double-blind | 2 arms |

| No. | Drug No. | Generic name          | Indication No. | Year of indication approval | Indication                                                                                                                                                                                                                                                                                                                                           | Single/Multiple Indications | Initial Pivotal Study (first author)                             | Publication Year | NCT                       | Clinical trial phase | Allocation    | Masking      | Arms   |
|-----|----------|-----------------------|----------------|-----------------------------|------------------------------------------------------------------------------------------------------------------------------------------------------------------------------------------------------------------------------------------------------------------------------------------------------------------------------------------------------|-----------------------------|------------------------------------------------------------------|------------------|---------------------------|----------------------|---------------|--------------|--------|
| 292 | 109      | Abemaciclib           | 3              | 2021                        | Abemaciclib in combination with endocrine therapy (tamoxifen or aromatase inhibitors) is indicated for adjuvant treatment of HR-positive, HER2-negative, lymph node-positive, high-risk early breast cancer adult patients with Ki-67 $\geq$ 20%                                                                                                     | Multiple                    | Stephen R. D. Johnston <sup>291</sup>                            | 2020             | NCT03155997               | Phase III            | Randomized    | None         | 2 arms |
| 293 | 110      | Dalpiciclib           | 1              | 2021                        | Dalpiciclib in combination with fulvestrant is indicated for patients who have experienced disease progression after prior endocrine therapy                                                                                                                                                                                                         | Multiple                    | Binghe Xu <sup>292</sup>                                         | 2021             | NCT03927456               | Phase III            | Randomized    | Double-blind | 2 arms |
| 294 | 110      | Dalpiciclib           | 2              | 2023                        | Indicated for patients with hormone receptor (HR)-positive, HER2-negative locally advanced or metastatic breast cancer: to be used in combination with an aromatase inhibitor as initial endocrine therapy.                                                                                                                                          | Multiple                    | Pin Zhang <sup>293</sup>                                         | 2023             | NCT03966898               | Phase III            | Randomized    | Double-blind | 2 arms |
| 295 | 111      | Ribociclib            | 1              | 2023                        | Indicated for use in combination with an aromatase inhibitor as initial endocrine therapy for premenopausal or perimenopausal women with hormone receptor (HR)-positive, HER2-negative locally advanced or metastatic breast cancer. When using endocrine therapy, it should be combined with a luteinizing hormone-releasing hormone (LHRH) agonist | Multiple                    | Debu Tripathy <sup>294</sup>                                     | 2018             | NCT02278120               | Phase III            | Randomized    | Double-blind | 2 arms |
| 296 | 111      | Ribociclib            | 2              | 2023                        | Indicated for use in postmenopausal women with hormone receptor (HR)-positive, HER2-negative locally advanced or metastatic breast cancer, in combination with an aromatase inhibitor as initial endocrine therapy                                                                                                                                   | Multiple                    | Gabriel N. Hortobagyi <sup>295,296</sup>                         | 2018/2022        | NCT01958021               | Phase III            | Randomized    | Double-blind | 2 arms |
| 297 | 112      | Sacituzumab Govitecan | 1              | 2022                        | Indicated for the treatment of adult patients with unresectable, locally advanced or metastatic triple-negative breast cancer (TNBC) who have received at least two prior systemic therapies, with at least one for metastatic disease                                                                                                               | Single                      | A. Bardia <sup>297</sup>                                         | 2019             | NCT01631552               | Phase II             | Nonrandomized | None         | 1 arm  |
| 298 | 113      | Vemurafenib           | 1              | 2017                        | Indicated for the treatment of unresectable or metastatic melanoma with BRAF V600 mutation-positive status                                                                                                                                                                                                                                           | Single                      | Paul B. Chapman <sup>298</sup> & Grant A McArthur <sup>299</sup> | 2011/2014        | NCT01006980               | Phase III            | Randomized    | None         | 2 arms |
| 299 | 114      | Sonidegib             | 1              | 2021                        | Indicated for the treatment of adult patients with locally advanced basal cell carcinoma (BCC) who are not candidates for surgery or radiation, or who have recurrent disease following surgery or radiation therapy                                                                                                                                 | Single                      | J.T. Lear <sup>300</sup>                                         | 2017             | NCT01327053               | Phase II             | Randomized    | Double-blind | 2 arms |
| 300 | 115      | Denosumab             | 1              | 2019                        | Indicated for the treatment of unresectable or surgically resectable bone giant cell tumors that could cause severe functional impairment, including adult patients and adolescents with skeletal maturity (defined as at least one mature long bone and body weight $\geq$ 45kg)                                                                    | Multiple                    | Sant Chawla <sup>301</sup>                                       | 2013             | NCT00680992               | Phase II             | Nonrandomized | None         | 1 arm  |
| 301 | 115      | Denosumab             | 2              | 2020                        | Indicated for the prevention of bone-related events in patients with bone metastases from solid tumors and in patients with multiple myeloma                                                                                                                                                                                                         | Multiple                    | Alison T. Stopeck <sup>302</sup> & Noopur Raje <sup>303</sup>    | 2010/2018        | NCT00321464 & NCT01345019 | Phase III            | Randomized    | Double-blind | 2 arms |
| 302 | 116      | Nimotuzumab           | 1              | 2008                        | Nimotuzumab in combination with radiotherapy is indicated for the treatment of stage III-IV nasopharyngeal carcinoma with positive EGFR gene expression                                                                                                                                                                                              | Multiple                    | Not Available                                                    | Not Available    | not available             | Phase II             | Randomized    | None         | 2 arms |
| 303 | 116      | Nimotuzumab           | 2              | 2023                        | Nimotuzumab in combination with gemcitabine is indicated for the treatment of K-Ras wild-type locally advanced or metastatic pancreatic cancer                                                                                                                                                                                                       | Multiple                    | B. Schultheis <sup>304</sup>                                     | 2017             | NCT00561990               | Phase II/IIIa        | Randomized    | Double-blind | 2 arms |
| 304 | 116      | Nimotuzumab           | 3              | 2024                        | Nimotuzumab in combination with concurrent chemoradiotherapy is indicated for the treatment of locally advanced head and neck squamous cell carcinoma                                                                                                                                                                                                | Multiple                    | Vijay Maruti Patil <sup>305</sup>                                | 2019             | not available             | Phase III            | Randomized    | None         | 2 arms |
| 305 | 117      | Niraparib             | 1              | 2019                        | Indicated for the maintenance treatment of adult patients with platinum-sensitive recurrent epithelial ovarian cancer, fallopian tube cancer, or primary peritoneal cancer, following platinum-based chemotherapy achieving a complete or partial response                                                                                           | Multiple                    | M.R. Mirza <sup>306</sup>                                        | 2016             | NCT01847274               | Phase III            | Randomized    | Double-blind | 2 arms |
| 306 | 117      | Niraparib             | 2              | 2020                        | Indicated for the maintenance treatment of adult patients with advanced epithelial ovarian cancer, fallopian tube cancer, or primary peritoneal cancer who have achieved a complete or partial response after first-line platinum-based chemotherapy                                                                                                 | Multiple                    | A. González-Martín <sup>307</sup>                                | 2019             | NCT02655016               | Phase III            | Randomized    | Double-blind | 2 arms |
| 307 | 118      | Fluzoparib            | 1              | 2020                        | Indicated for the treatment of platinum-sensitive recurrent ovarian cancer, fallopian tube cancer, or primary peritoneal cancer in patients with germline BRCA mutations who have received at least second-line chemotherapy                                                                                                                         | Multiple                    | N. Li <sup>308</sup>                                             | 2019             | NCT03509636               | Phase Ib             | Nonrandomized | None         | 1 arm  |

| No. | Drug No. | Generic name | Indication No. | Year of indication approval | Indication                                                                                                                                                                                                                                              | Single/Multiple Indications | Initial Pivotal Study (first author) | Publication Year | NCT         | Clinical trial phase | Allocation    | Masking      | Arms   |
|-----|----------|--------------|----------------|-----------------------------|---------------------------------------------------------------------------------------------------------------------------------------------------------------------------------------------------------------------------------------------------------|-----------------------------|--------------------------------------|------------------|-------------|----------------------|---------------|--------------|--------|
| 308 | 118      | Fluzoparib   | 2              | 2021                        | Indicated for maintenance treatment of platinum-sensitive recurrent epithelial ovarian cancer, fallopian tube cancer, or primary peritoneal cancer in adult patients who have achieved a complete or partial response after platinum-based chemotherapy | Multiple                    | Ning Li <sup>309</sup>               | 2022             | NCT03863860 | Phase III            | Randomized    | Double-blind | 2 arms |
| 309 | 119      | Pamiparib    | 1              | 2021                        | Indicated for the treatment of patients with relapsed, advanced ovarian cancer, fallopian tube cancer, or primary peritoneal cancer harboring a germline BRCA mutation, who have received two or more prior lines of chemotherapy                       | Single                      | Xiaohua Wu <sup>310</sup>            | 2022             | NCT03333915 | Phase/II             | Nonrandomized | None         | 1 arm  |
| 310 | 120      | Candonilimab | 1              | 2022                        | Indicated for the treatment of recurrent or metastatic cervical cancer in patients who have previously failed platinum-based chemotherapy                                                                                                               | Multiple                    | Not Available                        | Not Available    | NCT04380805 | PhaseIb/II           | Nonrandomized | None         | 1 arm  |
| 311 | 120      | Candonilimab | 2              | 2024                        | Candonilimab in combination with XELOX (oxaliplatin and capecitabine) is indicated for first-line treatment of unresectable locally advanced, recurrent, or metastatic gastric or gastroesophageal junction (G/GEJ) adenocarcinoma                      | Multiple                    | Jiafu Ji <sup>311</sup>              | 2024             | NCT05008783 | Phase III            | Randomized    | Double-blind | 2 arms |

## REFERENCES

- Fukuoka M, Wu YL, Thongprasert S, et al. Biomarker Analyses and Final Overall Survival Results From a Phase III, Randomized, Open-Label, First-Line Study of Gefitinib Versus Carboplatin/Paclitaxel in Clinically Selected Patients With Advanced Non-Small-Cell Lung Cancer in Asia (IPASS). *JCO*. 2011;29(21):2866-2874. doi:10.1200/JCO.2010.33.4235
- Shepherd FA, Hirsh V, Smylie M, Findlay B, Santabarbara P. Erlotinib in Previously Treated Non-Small-Cell Lung Cancer. *N Engl J Med*. 2005;353(2):123-132. doi:10.1056/NEJMoa050753
- Cappuzzo F, Ciuleanu T, Stelmakh L, et al. Erlotinib as maintenance treatment in advanced non-small-cell lung cancer: a multicentre, randomised, placebo-controlled phase 3 study. *The Lancet Oncology*. 2010;11(6):521-529. doi:10.1016/S1470-2045(10)70112-1
- Wu YL, Zhou C, Liam CK, et al. First-line erlotinib versus gemcitabine/cisplatin in patients with advanced EGFR mutation-positive non-small-cell lung cancer: analyses from the phase III, randomized, open-label, ENSURE study. *Annals of Oncology*. 2015;26(9):1883-1889. doi:10.1093/annonc/mdv270
- Shi Y, Li Z, Liu X. Icotinib versus gefitinib in previously treated advanced non-small-cell lung cancer (ICOGN): a randomised, double-blind phase 3 non-inferiority trial. *The Lancet Oncology*. 2013;14(10):953-961. doi:10.1016/S1470-2045(13)70355-3
- He J, Su C, Liang W, et al. Icotinib versus chemotherapy as adjuvant treatment for stage II-IIIa EGFR-mutant non-small-cell lung cancer (EVIDENCE): a randomised, open-label, phase 3 trial. *The Lancet Respiratory Medicine*. 2021;9(9):1021-1029. doi:10.1016/S2213-2600(21)00134-X
- Wu YL, Zhou C, Hu CP, et al. Afatinib versus cisplatin plus gemcitabine for first-line treatment of Asian patients with advanced non-small-cell lung cancer harbouring EGFR mutations (LUX-Lung 6): an open-label, randomised phase 3 trial. *The Lancet Oncology*. 2014;15(2):213-222. doi:10.1016/S1470-2045(13)70604-1
- Soria JC, Felip E, Cobo M, et al. Afatinib versus erlotinib as second-line treatment of patients with advanced squamous cell carcinoma of the lung (LUX-Lung 8): an open-label randomised controlled phase 3 trial. *The Lancet Oncology*. 2015;16(8):897-907. doi:10.1016/S1470-2045(15)00006-6
- Wu YL, Cheng Y, Zhou X, et al. Dacomitinib versus gefitinib as first-line treatment for patients with EGFR-mutation-positive non-small-cell lung cancer (ARCHER 1050): a randomised, open-label, phase 3 trial. *The Lancet Oncology*. 2017;18(11):1454-1466. doi:10.1016/S1470-2045(17)30608-3
- Hu M, Wu YL, Zhu X, et al. Identification of osimertinib resistance mechanisms in Chinese NSCLC patients: Analysis from AURA17 trial. *JCO*. 2018;36(15\_suppl):9077-9077. doi:10.1200/JCO.2018.36.15\_suppl.9077
- Soria JC, Ohe Y, Vansteenkiste J, et al. Osimertinib in Untreated EGFR -Mutated Advanced Non-Small-Cell Lung Cancer. *N Engl J Med*. 2018;378(2):113-125. doi:10.1056/NEJMoa1713137
- Wu YL, Tsuboi M, He J, et al. Osimertinib in Resected EGFR -Mutated Non-Small-Cell Lung Cancer. *N Engl J Med*. 2020;383(18):1711-1723. doi:10.1056/NEJMoa2027071
- Lu S, Wang Q, Zhang G, et al. Efficacy of Aumolertinib (HS-10296) in Patients With Advanced EGFR T790M+ NSCLC: Updated Post-National Medical Products Administration Approval Results From the APOLLO Registrational Trial. *Journal of Thoracic Oncology*. 2022;17(3):411-422. doi:10.1016/j.jtho.2021.10.024
- Lu S, Dong X, Jian H, et al. AENEAS: A Randomized Phase III Trial of Aumolertinib Versus Gefitinib as First-Line Therapy for Locally Advanced or Metastatic Non-Small-Cell Lung Cancer With EGFR Exon 19 Deletion or L858R Mutations. *JCO*. 2022;40(27):3162-3171. doi:10.1200/JCO.21.02641
- Shi Y, Hu X, Zhang S, et al. Efficacy, safety, and genetic analysis of furmonertinib (AST2818) in patients with EGFR T790M mutated non-small-cell lung cancer: a phase 2b, multicentre, single-arm, open-label study. *The Lancet Respiratory Medicine*. 2021;9(8):829-839. doi:10.1016/S2213-2600(20)30455-0
- Shi Y, Chen G, Wang X, et al. Furmonertinib (AST2818) versus gefitinib as first-line therapy for Chinese patients with locally advanced or metastatic EGFR mutation-positive non-small-cell lung cancer (FURLONG): a multicentre, double-blind, randomised phase 3 study. *The Lancet Respiratory Medicine*. 2022;10(11):1019-1028. doi:10.1016/S2213-2600(22)00168-0
- Lu S, Zhang Y, Zhang G, et al. Efficacy and Safety of Befotertinib (D-0316) in Patients With EGFR T790M-Mutated NSCLC That Had Progressed After Prior EGFR Tyrosine Kinase Inhibitor Therapy: A Phase 2, Multicenter, Single-Arm, Open-Label Study. *Journal of Thoracic Oncology*. 2022;17(10):1192-1204. doi:10.1016/j.jtho.2022.06.002
- Shaw AT, Kim DW, Nakagawa K, et al. Crizotinib versus Chemotherapy in Advanced ALK -Positive Lung Cancer. *N Engl J Med*. 2013;368(25):2385-2394. doi:10.1056/NEJMoa1214886

19. Wu YL, Yang JCH, Kim DW, et al. Phase II Study of Crizotinib in East Asian Patients With ROS1-Positive Advanced Non–Small-Cell Lung Cancer. *JCO*. 2018;36(14):1405-1411. doi:10.1200/JCO.2017.75.5587
20. Peters S, Camidge DR, Shaw AT, et al. Alectinib versus Crizotinib in Untreated *ALK* -Positive Non–Small-Cell Lung Cancer. *N Engl J Med*. 2017;377(9):829-838. doi:10.1056/NEJMoa1704795
21. Shaw AT, Kim TM, Crinò L, et al. Ceritinib versus chemotherapy in patients with *ALK*-rearranged non-small-cell lung cancer previously given chemotherapy and crizotinib (ASCEND-5): a randomised, controlled, open-label, phase 3 trial. *The Lancet Oncology*. 2017;18(7):874-886. doi:10.1016/S1470-2045(17)30339-X
22. Soria JC, Tan DSW, Chiari R, et al. First-line ceritinib versus platinum-based chemotherapy in advanced *ALK* -rearranged non-small-cell lung cancer (ASCEND-4): a randomised, open-label, phase 3 study. *The Lancet*. 2017;389(10072):917-929. doi:10.1016/S0140-6736(17)30123-X
23. Yang Y, Zhou J, Zhou J, et al. Efficacy, safety, and biomarker analysis of ensartinib in crizotinib-resistant, *ALK*-positive non-small-cell lung cancer: a multicentre, phase 2 trial. *The Lancet Respiratory Medicine*. 2020;8(1):45-53. doi:10.1016/S2213-2600(19)30252-8
24. Horn L, Wang Z, Wu G, et al. Ensartinib vs Crizotinib for Patients With Anaplastic Lymphoma Kinase–Positive Non–Small Cell Lung Cancer: A Randomized Clinical Trial. *JAMA Oncol*. 2021;7(11):1617. doi:10.1001/jamaoncol.2021.3523
25. Camidge DR, Kim HR, Ahn MJ, et al. Brigatinib versus Crizotinib in *ALK* -Positive Non–Small-Cell Lung Cancer. *N Engl J Med*. 2018;379(21):2027-2039. doi:10.1056/NEJMoa1810171
26. Camidge DR, Kim HR, Ahn MJ, et al. Brigatinib Versus Crizotinib in Advanced *ALK* Inhibitor–Naive *ALK*-Positive Non–Small Cell Lung Cancer: Second Interim Analysis of the Phase III ALTA-1L Trial. *JCO*. 2020;38(31):3592-3603. doi:10.1200/JCO.20.00505
27. Lu S, Zhou Q, Liu X, et al. Lorlatinib for Previously Treated *ALK*-Positive Advanced NSCLC: Primary Efficacy and Safety From a Phase 2 Study in People’s Republic of China. *Journal of Thoracic Oncology*. 2022;17(6):816-826. doi:10.1016/j.jtho.2022.02.014
28. Shaw AT, Bauer TM, De Marinis F, et al. First-Line Lorlatinib or Crizotinib in Advanced *ALK* -Positive Lung Cancer. *N Engl J Med*. 2020;383(21):2018-2029. doi:10.1056/NEJMoa2027187
29. Shi Y, Chen J, Zhang H, et al. Efficacy and safety of iruplinalkib (WX-0593) in *ALK*-positive crizotinib-resistant advanced non-small cell lung cancer patients: a single-arm, multicenter phase II study (INTELLECT). *BMC Med*. 2023;21(1):72. doi:10.1186/s12916-023-02738-5
30. Shi Y, Chen J, Yang R, et al. Iruplinalkib (WX-0593) Versus Crizotinib in *ALK* TKI-Naive Locally Advanced or Metastatic *ALK*-Positive NSCLC: Interim Analysis of a Randomized, Open-Label, Phase 3 Study (INSPIRE). *Journal of Thoracic Oncology*. 2024;19(6):912-927. doi:10.1016/j.jtho.2024.01.013
31. Cassidy J, Clarke S, Díaz-Rubio E, et al. XELOX vs FOLFOX-4 as first-line therapy for metastatic colorectal cancer: NO16966 updated results. *Br J Cancer*. 2011;105(1):58-64. doi:10.1038/bjc.2011.201
32. Sandler A, Schiller JH, Johnson DH. Paclitaxel–Carboplatin Alone or with Bevacizumab for Non–Small-Cell Lung Cancer. *N Engl J Med*. 2006;355:2542-2550.
33. Wick W, Gorlia T, Bendszus M, et al. Lomustine and Bevacizumab in Progressive Glioblastoma. *N Engl J Med*. 2017;377(20):1954-1963. doi:10.1056/NEJMoa1707358
34. Finn RS, Qin S, Ikeda M, et al. Atezolizumab plus Bevacizumab in Unresectable Hepatocellular Carcinoma. *N Engl J Med*. 2020;382(20):1894-1905. doi:10.1056/NEJMoa1915745
35. Burger RA, Fleming GF, Mannel RS, Greer BE, Liang SX. Incorporation of Bevacizumab in the Primary Treatment of Ovarian Cancer. *N Engl J Med*. 2011;365:2473-2483.
36. Tewari KS, Sill MW, Long HJ, et al. Improved Survival with Bevacizumab in Advanced Cervical Cancer. *N Engl J Med*. 2014;370(8):734-743. doi:10.1056/NEJMoa1309748
37. Han B, Li K, Wang Q, et al. Effect of Anlotinib as a Third-Line or Further Treatment on Overall Survival of Patients With Advanced Non–Small Cell Lung Cancer: The ALTER 0303 Phase 3 Randomized Clinical Trial. *JAMA Oncol*. 2018;4(11):1569. doi:10.1001/jamaoncol.2018.3039
38. Chi Y, Yao Y, Wang S, et al. Anlotinib for metastasis soft tissue sarcoma: A randomized, double-blind, placebo-controlled and multi-centered clinical trial. *JCO*. 2018;36(15\_suppl):11503-11503. doi:10.1200/JCO.2018.36.15\_suppl.11503
39. Cheng Y, Wang Q, Li K, et al. Anlotinib vs placebo as third- or further-line treatment for patients with small cell lung cancer: a randomised, double-blind, placebo-controlled Phase 2 study. *Br J Cancer*. 2021;125(3):366-371. doi:10.1038/s41416-021-01356-3
40. Li D, Chi Y, Chen X, et al. Anlotinib in Locally Advanced or Metastatic Medullary Thyroid Carcinoma: A Randomized, Double-Blind Phase IIB Trial. *Clinical Cancer Research*. 2021;27(13):3567-3575. doi:10.1158/1078-0432.CCR-20-2950
41. Chi Y, Zheng X, Zhang Y, et al. Anlotinib in Locally Advanced or Metastatic Radioiodine-Refractory Differentiated Thyroid Carcinoma: A Randomized, Double-Blind, Multicenter Phase II Trial. *Clinical Cancer Research*. 2023;29(20):4047-4056. doi:10.1158/1078-0432.CCR-22-3406
42. Motzer RJ, Escudier B, Oudard S, et al. Phase 3 trial of everolimus for metastatic renal cell carcinoma: Final results and analysis of prognostic factors. *Cancer*. 2010;116(18):4256-4265. doi:10.1002/cncr.25219
43. Yao JC, Shah MH, Ito T, et al. Everolimus for Advanced Pancreatic Neuroendocrine Tumors. *N Engl J Med*. 2011;364(6):514-523. doi:10.1056/NEJMoa1009290
44. Franz DN, Belousova E, Sparagana S, et al. Efficacy and safety of everolimus for subependymal giant cell astrocytomas associated with tuberous sclerosis complex (EXIST-1): a multicentre, randomised, placebo-controlled phase 3 trial. *The Lancet*. 2013;381(9861):125-132. doi:10.1016/S0140-6736(12)61134-9
45. Bissler JJ, Kingswood JC, Radzikowska E, et al. Everolimus for angiomyolipoma associated with tuberous sclerosis complex or sporadic lymphangioleiomyomatosis (EXIST-2): a multicentre, randomised, double-blind, placebo-controlled trial. *The Lancet*. 2013;381(9869):817-824. doi:10.1016/S0140-6736(12)61767-X
46. Yao JC, Fazio N, Singh S, et al. Everolimus for the treatment of advanced, non-functional neuroendocrine tumours of the lung or gastrointestinal tract (RADIANT-4): a randomised, placebo-controlled, phase 3 study. *The Lancet*. 2016;387(10022):968-977. doi:10.1016/S0140-6736(15)00817-X
47. Yardley DA, Noguchi S, Pritchard KI, et al. Everolimus Plus Exemestane in Postmenopausal Patients with HR+ Breast Cancer: BOLERO-2 Final Progression-Free Survival Analysis. *Adv Ther*. 2013;30(10):870-884. doi:10.1007/s12325-013-0060-1
48. Piccart M, Hortobagyi GN, Campone M, et al. Everolimus plus exemestane for hormone-receptor-positive, human epidermal growth factor receptor-2-negative advanced breast cancer: overall survival results from BOLERO-2. *Annals of Oncology*. 2014;25(12):2357-2362. doi:10.1093/annonc/mdu456
49. Gainor JF, Curigliano G, Kim DW, et al. Pralsetinib for RET fusion-positive non-small-cell lung cancer (ARROW): a multi-cohort, open-label, phase 1/2 study. *The Lancet Oncology*. 2021;22(7):959-969. doi:10.1016/S1470-2045(21)00247-3
50. Subbiah V, Hu MI, Wirth LJ, et al. Pralsetinib for patients with advanced or metastatic RET-altered thyroid cancer (ARROW): a multi-cohort, open-label, registrational, phase 1/2 study. *The Lancet Diabetes & Endocrinology*. 2021;9(8):491-501. doi:10.1016/S2213-8587(21)00120-0
51. Drilon A, Oxnard GR, Tan DSW, et al. Efficacy of Selpercatinib in *RET* Fusion–Positive Non–Small–Cell Lung Cancer. *N Engl J Med*. 2020;383(9):813-824. doi:10.1056/NEJMoa2005653

52. Wirth LJ, Sherman E, Robinson B, et al. Efficacy of Selpercatinib in *RET* -Altered Thyroid Cancers. *N Engl J Med.* 2020;383(9):825-835. doi:10.1056/NEJMoa2005651
53. Lu S, Fang J, Li X, et al. Once-daily savolitinib in Chinese patients with pulmonary sarcomatoid carcinomas and other non-small-cell lung cancers harbouring MET exon 14 skipping alterations: a multicentre, single-arm, open-label, phase 2 study. *The Lancet Respiratory Medicine.* 2021;9(10):1154-1164. doi:10.1016/S2213-2600(21)00084-9
54. Yu Y, Zhou J, Li X, et al. Gumarontinib in patients with non-small-cell lung cancer harbouring MET exon 14 skipping mutations: a multicentre, single-arm, open-label, phase 1b/2 trial. *eClinicalMedicine.* 2023;59:101952. doi:10.1016/j.eclinm.2023.101952
55. Long GV, Stroyakovskiy D, Gogas H, et al. Combined BRAF and MEK Inhibition versus BRAF Inhibition Alone in Melanoma. *N Engl J Med.* 2014;371(20):1877-1888. doi:10.1056/NEJMoa1406037
56. Long GV, Stroyakovskiy D, Gogas H, et al. Dabrafenib and trametinib versus dabrafenib and placebo for Val600 BRAF-mutant melanoma: a multicentre, double-blind, phase 3 randomised controlled trial. *The Lancet.* 2015;386(9992):444-451. doi:10.1016/S0140-6736(15)60898-4
57. Long GV, Hauschild A, Santinami M, et al. Adjuvant Dabrafenib plus Trametinib in Stage III *BRAF* -Mutated Melanoma. *N Engl J Med.* 2017;377(19):1813-1823. doi:10.1056/NEJMoa1708539
58. Planchard D, Kim TM, Mazieres J, et al. Dabrafenib in patients with BRAFV600E-positive advanced non-small-cell lung cancer: a single-arm, multicentre, open-label, phase 2 trial. *The Lancet Oncology.* 2016;17(5):642-650. doi:10.1016/S1470-2045(16)00077-2
59. Planchard D, Besse B, Groen HJM, et al. Dabrafenib plus trametinib in patients with previously treated BRAFV600E-mutant metastatic non-small cell lung cancer: an open-label, multicentre phase 2 trial. *The Lancet Oncology.* 2016;17(7):984-993. doi:10.1016/S1470-2045(16)30146-2
60. Planchard D, Smit EF, Groen HJM, et al. Dabrafenib plus trametinib in patients with previously untreated BRAFV600E-mutant metastatic non-small-cell lung cancer: an open-label, phase 2 trial. *The Lancet Oncology.* 2017;18(10):1307-1316. doi:10.1016/S1470-2045(17)30679-4
61. Doebele RC, Drilon A, Paz-Ares L, et al. Entrectinib in patients with advanced or metastatic NTRK fusion-positive solid tumours: integrated analysis of three phase 1–2 trials. *The Lancet Oncology.* 2020;21(2):271-282. doi:10.1016/S1470-2045(19)30691-6
62. Drilon A, Siena S, Dziadziuszko R, et al. Entrectinib in ROS1 fusion-positive non-small-cell lung cancer: integrated analysis of three phase 1–2 trials. *The Lancet Oncology.* 2020;21(2):261-270. doi:10.1016/S1470-2045(19)30690-4
63. Desai AV, Robinson GW, Gauvain K, et al. Entrectinib in children and young adults with solid or primary CNS tumors harboring *NTRK* , *ROS1* , or *ALK* aberrations (STARTRK-NG). *Neuro-Oncology.* 2022;24(10):1776-1789. doi:10.1093/neuonc/noac087
64. Zhou C, Ramalingam SS, Kim TM, et al. Treatment Outcomes and Safety of Mobocertinib in Platinum-Pretreated Patients With *EGFR* Exon 20 Insertion–Positive Metastatic Non–Small Cell Lung Cancer: A Phase 1/2 Open-label Nonrandomized Clinical Trial. *JAMA Oncol.* 2021;7(12):e214761. doi:10.1001/jamaoncol.2021.4761
65. Wu YL, Lu S, Cheng Y, et al. Nivolumab Versus Docetaxel in a Predominantly Chinese Patient Population With Previously Treated Advanced NSCLC: CheckMate 078 Randomized Phase III Clinical Trial. *Journal of Thoracic Oncology.* 2019;14(5):867-875. doi:10.1016/j.jtho.2019.01.006
66. Ferris RL, Blumenschein G, Fayette J, et al. Nivolumab for Recurrent Squamous–Cell Carcinoma of the Head and Neck. *N Engl J Med.* 2016;375(19):1856-1867. doi:10.1056/NEJMoa1602252
67. Ferris RL, Blumenschein G, Fayette J, et al. Nivolumab vs investigator’s choice in recurrent or metastatic squamous cell carcinoma of the head and neck: 2-year long-term survival update of CheckMate 141 with analyses by tumor PD-L1 expression. *Oral Oncology.* 2018;81:45-51. doi:10.1016/j.oraloncology.2018.04.008
68. Kang YK, Boku N, Satoh T, et al. Nivolumab in patients with advanced gastric or gastro-oesophageal junction cancer refractory to, or intolerant of, at least two previous chemotherapy regimens (ONO-4538-12, ATTRACTION-2): a randomised, double-blind, placebo-controlled, phase 3 trial. *The Lancet.* 2017;390(10111):2461-2471. doi:10.1016/S0140-6736(17)31827-5
69. Chen LT, Satoh T, Ryu MH, et al. A phase 3 study of nivolumab in previously treated advanced gastric or gastroesophageal junction cancer (ATTRACTION-2): 2-year update data. *Gastric Cancer.* 2020;23(3):510-519. doi:10.1007/s10120-019-01034-7
70. Baas P, Scherpereel A, Nowak AK, et al. First-line nivolumab plus ipilimumab in unresectable malignant pleural mesothelioma (CheckMate 743): a multicentre, randomised, open-label, phase 3 trial. *The Lancet.* 2021;397(10272):375-386. doi:10.1016/S0140-6736(20)32714-8
71. Janjigian YY, Shitara K, Moehler M, et al. First-line nivolumab plus chemotherapy versus chemotherapy alone for advanced gastric, gastro-oesophageal junction, and oesophageal adenocarcinoma (CheckMate 649): a randomised, open-label, phase 3 trial. *The Lancet.* 2021;398(10294):27-40. doi:10.1016/S0140-6736(21)00797-2
72. Doki Y, Ajani JA, Kato K, et al. Nivolumab Combination Therapy in Advanced Esophageal Squamous–Cell Carcinoma. *N Engl J Med.* 2022;386(5):449-462. doi:10.1056/NEJMoa2111380
73. Kelly RJ, Ajani JA, Kuzdzal J, et al. Adjuvant Nivolumab in Resected Esophageal or Gastroesophageal Junction Cancer. *N Engl J Med.* 2021;384(13):1191-1203. doi:10.1056/NEJMoa2032125
74. Forde PM, Spicer J, Lu S, et al. Neoadjuvant Nivolumab plus Chemotherapy in Resectable Lung Cancer. *N Engl J Med.* 2022;386(21):1973-1985. doi:10.1056/NEJMoa2202170
75. Bajorin DF, Witjes JA, Gschwend JE, et al. Adjuvant Nivolumab versus Placebo in Muscle-Invasive Urothelial Carcinoma. *N Engl J Med.* 2021;384(22):2102-2114. doi:10.1056/NEJMoa2034442
76. André T, Elez E, Van Cutsem E, et al. Nivolumab plus Ipilimumab in Microsatellite–Instability–High Metastatic Colorectal Cancer. *N Engl J Med.* 2024;391(21):2014-2026. doi:10.1056/NEJMoa2402141
77. Van Der Heijden MS, Sonpavde G, Powles T, et al. Nivolumab plus Gemcitabine–Cisplatin in Advanced Urothelial Carcinoma. *N Engl J Med.* 2023;389(19):1778-1789. doi:10.1056/NEJMoa2309863
78. Si L, Zhang X, Shu Y, et al. A Phase Ib Study of Pembrolizumab as Second-Line Therapy for Chinese Patients With Advanced or Metastatic Melanoma (KEYNOTE-151). *Translational Oncology.* 2019;12(6):828-835. doi:10.1016/j.tranon.2019.02.007
79. Gandhi L, Rodríguez-Abreu D, Gadgeel S, et al. Pembrolizumab plus Chemotherapy in Metastatic Non–Small-Cell Lung Cancer. *N Engl J Med.* 2018;378(22):2078-2092. doi:10.1056/NEJMoa1801005
80. Mok TSK, Wu YL, Kudaba I, et al. Pembrolizumab versus chemotherapy for previously untreated, PD-L1-expressing, locally advanced or metastatic non-small-cell lung cancer (KEYNOTE-042): a randomised, open-label, controlled, phase 3 trial. *The Lancet.* 2019;393(10183):1819-1830. doi:10.1016/S0140-6736(18)32409-7
81. Paz-Ares L, Luft A, Vicente D, et al. Pembrolizumab plus Chemotherapy for Squamous Non–Small-Cell Lung Cancer. *N Engl J Med.* 2018;379(21):2040-2051. doi:10.1056/NEJMoa1810865

82. Kojima T, Shah MA, Muro K, et al. Randomized Phase III KEYNOTE-181 Study of Pembrolizumab Versus Chemotherapy in Advanced Esophageal Cancer. *JCO*. 2020;38(35):4138-4148. doi:10.1200/JCO.20.01888
83. Burtneß B, Harrington KJ, Greil R, et al. Pembrolizumab alone or with chemotherapy versus cetuximab with chemotherapy for recurrent or metastatic squamous cell carcinoma of the head and neck (KEYNOTE-048): a randomised, open-label, phase 3 study. *The Lancet*. 2019;394(10212):1915-1928. doi:10.1016/S0140-6736(19)32591-7
84. André T, Shiu KK, Kim TW, et al. Pembrolizumab in Microsatellite-Instability-High Advanced Colorectal Cancer. *N Engl J Med*. 2020;383(23):2207-2218. doi:10.1056/NEJMoa2017699
85. Sun JM, Shen L, Shah MA, et al. Pembrolizumab plus chemotherapy versus chemotherapy alone for first-line treatment of advanced oesophageal cancer (KEYNOTE-590): a randomised, placebo-controlled, phase 3 study. *The Lancet*. 2021;398(10302):759-771. doi:10.1016/S0140-6736(21)01234-4
86. Qin S, Chen Z, Fang W, et al. Pembrolizumab Versus Placebo as Second-Line Therapy in Patients From Asia With Advanced Hepatocellular Carcinoma: A Randomized, Double-Blind, Phase III Trial. *JCO*. 2023;41(7):1434-1443. doi:10.1200/JCO.22.00620
87. Schmid P, Cortes J, Puztai L, et al. Pembrolizumab for Early Triple-Negative Breast Cancer. *N Engl J Med*. 2020;382(9):810-821. doi:10.1056/NEJMoa1910549
88. Schmid P, Cortes J, Dent R, et al. Event-free Survival with Pembrolizumab in Early Triple-Negative Breast Cancer. *N Engl J Med*. 2022;386(6):556-567. doi:10.1056/NEJMoa2112651
89. Le DT, Kim TW, Van Cutsem E, et al. Phase II Open-Label Study of Pembrolizumab in Treatment-Refractory, Microsatellite Instability-High/Mismatch Repair-Deficient Metastatic Colorectal Cancer: KEYNOTE-164. *JCO*. 2020;38(1):11-19. doi:10.1200/JCO.19.02107
90. Marabelle A, Le DT, Ascierto PA, et al. Efficacy of Pembrolizumab in Patients With Noncolorectal High Microsatellite Instability/Mismatch Repair-Deficient Cancer: Results From the Phase II KEYNOTE-158 Study. *JCO*. 2020;38(1):1-10. doi:10.1200/JCO.19.02105
91. Rha SY, Oh DY, Yañez P, et al. Pembrolizumab plus chemotherapy versus placebo plus chemotherapy for HER2-negative advanced gastric cancer (KEYNOTE-859): a multicentre, randomised, double-blind, phase 3 trial. *The Lancet Oncology*. 2023;24(11):1181-1195. doi:10.1016/S1470-2045(23)00515-6
92. Kelley RK, Ueno M, Yoo C, et al. Pembrolizumab in combination with gemcitabine and cisplatin compared with gemcitabine and cisplatin alone for patients with advanced biliary tract cancer (KEYNOTE-966): a randomised, double-blind, placebo-controlled, phase 3 trial. *The Lancet*. 2023;401(10391):1853-1865. doi:10.1016/S0140-6736(23)00727-4
93. Janjigian YY, Kawazoe A, Bai Y, et al. Pembrolizumab in HER2-Positive Gastric Cancer. *N Engl J Med*. 2024;391(14):1360-1362. doi:10.1056/NEJMc2408121
94. Antonia SJ, Villegas A, Daniel D, et al. Durvalumab after Chemoradiotherapy in Stage III Non-Small-Cell Lung Cancer. *N Engl J Med*. 2017;377(20):1919-1929. doi:10.1056/NEJMoa1709937
95. Paz-Ares L, Dvorkin M, Chen Y, et al. Durvalumab plus platinum-etoposide versus platinum-etoposide in first-line treatment of extensive-stage small-cell lung cancer (CASPIAN): a randomised, controlled, open-label, phase 3 trial. *The Lancet*. 2019;394(10212):1929-1939. doi:10.1016/S0140-6736(19)32222-6
96. Oh DY, Ruth He A, Qin S, et al. Durvalumab plus Gemcitabine and Cisplatin in Advanced Biliary Tract Cancer. *NEJM Evidence*. 2022;1(8). doi:10.1056/EVIDoa2200015
97. Horn L, Mansfield AS, Szcześna A, et al. First-Line Atezolizumab plus Chemotherapy in Extensive-Stage Small-Cell Lung Cancer. *N Engl J Med*. 2018;379(23):2220-2229. doi:10.1056/NEJMoa1809064
98. Finn RS, Qin S, Ikeda M, et al. Atezolizumab plus Bevacizumab in Unresectable Hepatocellular Carcinoma. *N Engl J Med*. 2020;382(20):1894-1905. doi:10.1056/NEJMoa1915745
99. Herbst RS, Giaccone G, De Marinis F, et al. Atezolizumab for First-Line Treatment of PD-L1-Selected Patients with NSCLC. *N Engl J Med*. 2020;383(14):1328-1339. doi:10.1056/NEJMoa1917346
100. Nishio M, Barlesi F, West H, et al. Atezolizumab Plus Chemotherapy for First-Line Treatment of Nonsquamous NSCLC: Results From the Randomized Phase 3 IMpower132 Trial. *Journal of Thoracic Oncology*. 2021;16(4):653-664. doi:10.1016/j.jtho.2020.11.025
101. Felip E, Altorki N, Zhou C, et al. Adjuvant atezolizumab after adjuvant chemotherapy in resected stage IB-IIIa non-small-cell lung cancer (IMpower010): a randomised, multicentre, open-label, phase 3 trial. *The Lancet*. 2021;398(10308):1344-1357. doi:10.1016/S0140-6736(21)02098-5
102. Song Y, Wu J, Chen X, et al. A Single-Arm, Multicenter, Phase II Study of Camrelizumab in Relapsed or Refractory Classical Hodgkin Lymphoma. *Clinical Cancer Research*. 2019;25(24):7363-7369. doi:10.1158/1078-0432.CCR-19-1680
103. Qin S, Ren Z, Meng Z, et al. Camrelizumab in patients with previously treated advanced hepatocellular carcinoma: a multicentre, open-label, parallel-group, randomised, phase 2 trial. *The Lancet Oncology*. 2020;21(4):571-580. doi:10.1016/S1470-2045(20)30011-5
104. Huang J, Xu J, Chen Y, et al. Camrelizumab versus investigator's choice of chemotherapy as second-line therapy for advanced or metastatic oesophageal squamous cell carcinoma (ESCORT): a multicentre, randomised, open-label, phase 3 study. *The Lancet Oncology*. 2020;21(6):832-842. doi:10.1016/S1470-2045(20)30110-8
105. Zhou C, Chen G, Huang Y, et al. Camrelizumab plus carboplatin and pemetrexed versus chemotherapy alone in chemotherapy-naïve patients with advanced non-squamous non-small-cell lung cancer (CameL): a randomised, open-label, multicentre, phase 3 trial. *The Lancet Respiratory Medicine*. 2021;9(3):305-314. doi:10.1016/S2213-2600(20)30365-9
106. Yang Y, Zhou T, Chen X, et al. Efficacy, safety, and biomarker analysis of Camrelizumab in Previously Treated Recurrent or Metastatic Nasopharyngeal Carcinoma (CAPTAIN study). *J Immunother Cancer*. 2021;9(12):e003790. doi:10.1136/jitc-2021-003790
107. Yang Y, Qu S, Li J, et al. Camrelizumab versus placebo in combination with gemcitabine and cisplatin as first-line treatment for recurrent or metastatic nasopharyngeal carcinoma (CAPTAIN-1st): a multicentre, randomised, double-blind, phase 3 trial. *The Lancet Oncology*. 2021;22(8):1162-1174. doi:10.1016/S1470-2045(21)00302-8
108. Ren S, Chen J, Xu X, et al. Camrelizumab Plus Carboplatin and Paclitaxel as First-Line Treatment for Advanced Squamous NSCLC (CameL-Sq): A Phase 3 Trial. *Journal of Thoracic Oncology*. 2022;17(4):544-557. doi:10.1016/j.jtho.2021.11.018
109. Luo H, Lu J, Bai Y, et al. Effect of Camrelizumab vs Placebo Added to Chemotherapy on Survival and Progression-Free Survival in Patients With Advanced or Metastatic Esophageal Squamous Cell Carcinoma: The ESCORT-1st Randomized Clinical Trial. *JAMA*. 2021;326(10):916. doi:10.1001/jama.2021.12836
110. Qin S, Chan SL, Gu S, et al. Camrelizumab plus rivoceranib versus sorafenib as first-line therapy for unresectable hepatocellular carcinoma (CARES-310): a randomised, open-label, international phase 3 study. *The Lancet*. 2023;402(10408):1133-1146. doi:10.1016/S0140-6736(23)00961-3
111. Song Y, Gao Q, Zhang H, et al. Treatment of relapsed or refractory classical Hodgkin lymphoma with the anti-PD-1, tislelizumab: results of a phase 2, single-arm, multicenter study. *Leukemia*. 2020;34(2):533-542. doi:10.1038/s41375-019-0545-2
112. Ye D, Liu J, Zhou A, et al. Tislelizumab in Asian patients with previously treated locally advanced or metastatic urothelial carcinoma. *Cancer Science*. 2021;112(1):305-313. doi:10.1111/cas.14681

113. Wang J, Lu S, Yu X, et al. Tislelizumab Plus Chemotherapy vs Chemotherapy Alone as First-line Treatment for Advanced Squamous Non–Small-Cell Lung Cancer: A Phase 3 Randomized Clinical Trial. *JAMA Oncol.* 2021;7(5):709. doi:10.1001/jamaoncol.2021.0366
114. Lu S, Wang J, Yu Y, et al. Tislelizumab Plus Chemotherapy as First-Line Treatment for Locally Advanced or Metastatic Nonsquamous NSCLC (RATIONALE 304): A Randomized Phase 3 Trial. *Journal of Thoracic Oncology.* 2021;16(9):1512-1522. doi:10.1016/j.jtho.2021.05.005
115. Ren Z, Ducreux M, Abou-Alfa GK, et al. Tislelizumab in Patients with Previously Treated Advanced Hepatocellular Carcinoma (RATIONALE-208): A Multicenter, Non-Randomized, Open-Label, Phase 2 Trial. *Liver Cancer.* 2023;12(1):72-84. doi:10.1159/000527175
116. Zhou C, Huang D, Fan Y, et al. Tislelizumab Versus Docetaxel in Patients With Previously Treated Advanced NSCLC (RATIONALE-303): A Phase 3, Open-Label, Randomized Controlled Trial. *Journal of Thoracic Oncology.* 2023;18(1):93-105. doi:10.1016/j.jtho.2022.09.217
117. Li J, Xu Y, Zang A, et al. Tislelizumab in previously treated, locally advanced unresectable/metastatic microsatellite instability-high/ mismatch repair-deficient solid tumors. *Chin J Cancer Res.* 2024;36(3).
118. Shen L, Kato K, Kim SB, et al. Tislelizumab Versus Chemotherapy as Second-Line Treatment for Advanced or Metastatic Esophageal Squamous Cell Carcinoma (RATIONALE-302): A Randomized Phase III Study. *JCO.* 2022;40(26):3065-3076. doi:10.1200/JCO.21.01926
119. Yang Y, Pan J, Wang H, et al. Tislelizumab plus chemotherapy as first-line treatment for recurrent or metastatic nasopharyngeal cancer: A multicenter phase 3 trial (RATIONALE-309). *Cancer Cell.* 2023;41(6):1061-1072.e4. doi:10.1016/j.ccell.2023.04.014
120. Qiu MZ, Oh DY, Kato K, et al. Tislelizumab plus chemotherapy versus placebo plus chemotherapy as first line treatment for advanced gastric or gastro-oesophageal junction adenocarcinoma: RATIONALE-305 randomised, double blind, phase 3 trial. *BMJ.* Published online May 28, 2024:e078876. doi:10.1136/bmj-2023-078876
121. Xu J, Kato K, Raymond E, et al. Tislelizumab plus chemotherapy versus placebo plus chemotherapy as first-line treatment for advanced or metastatic oesophageal squamous cell carcinoma (RATIONALE-306): a global, randomised, placebo-controlled, phase 3 study. *The Lancet Oncology.* 2023;24(5):483-495. doi:10.1016/S1470-2045(23)00108-0
122. Qin S, Kudo M, Meyer T, et al. Tislelizumab vs Sorafenib as First-Line Treatment for Unresectable Hepatocellular Carcinoma: A Phase 3 Randomized Clinical Trial. *JAMA Oncol.* 2023;9(12):1651. doi:10.1001/jamaoncol.2023.4003
123. Cheng Y, Fan Y, Zhao Y, et al. Tislelizumab Plus Platinum and Etoposide Versus Placebo Plus Platinum and Etoposide as First-Line Treatment for Extensive-Stage SCLC (RATIONALE-312): A Multicenter, Double-Blind, Placebo-Controlled, Randomized, Phase 3 Clinical Trial. *Journal of Thoracic Oncology.* 2024;19(7):1073-1085. doi:10.1016/j.jtho.2024.03.008
124. Yue D, Wang W, Liu H, et al. Perioperative tislelizumab plus neoadjuvant chemotherapy for patients with resectable non-small-cell lung cancer (RATIONALE-315): an interim analysis of a randomised clinical trial. *The Lancet Respiratory Medicine.* 2025;13(2):119-129. doi:10.1016/S2213-2600(24)00269-8
125. Shi Y, Su H, Song Y, et al. Safety and activity of sintilimab in patients with relapsed or refractory classical Hodgkin lymphoma (ORIENT-1): a multicentre, single-arm, phase 2 trial. *The Lancet Haematology.* 2019;6(1):e12-e19. doi:10.1016/S2352-3026(18)30192-3
126. Lu Z, Wang J, Shu Y, et al. Sintilimab versus placebo in combination with chemotherapy as first line treatment for locally advanced or metastatic oesophageal squamous cell carcinoma (ORIENT-15): multicentre, randomised, double blind, phase 3 trial. *BMJ.* Published online April 19, 2022:e068714. doi:10.1136/bmj-2021-068714
127. Yang Y, Wang Z, Fang J, et al. Efficacy and Safety of Sintilimab Plus Pemetrexed and Platinum as First-Line Treatment for Locally Advanced or Metastatic Nonsquamous NSCLC: a Randomized, Double-Blind, Phase 3 Study (Oncology pRogram by InnovENT anti-PD-1-11). *Journal of Thoracic Oncology.* 2020;15(10):1636-1646. doi:10.1016/j.jtho.2020.07.014
128. Zhou C, Wu L, Fan Y, et al. Sintilimab Plus Platinum and Gemcitabine as First-Line Treatment for Advanced or Metastatic Squamous NSCLC: Results From a Randomized, Double-Blind, Phase 3 Trial (ORIENT-12). *Journal of Thoracic Oncology.* 2021;16(9):1501-1511. doi:10.1016/j.jtho.2021.04.011
129. Ren Z, Xu J, Bai Y, et al. Sintilimab plus a bevacizumab biosimilar (IBI305) versus sorafenib in unresectable hepatocellular carcinoma (ORIENT-32): a randomised, open-label, phase 2–3 study. *The Lancet Oncology.* 2021;22(7):977-990. doi:10.1016/S1470-2045(21)00252-7
130. Xu J, Jiang H, Pan Y, et al. Sintilimab Plus Chemotherapy for Unresectable Gastric or Gastroesophageal Junction Cancer: The ORIENT-16 Randomized Clinical Trial. *JAMA.* 2023;330(21):2064. doi:10.1001/jama.2023.19918
131. Lu S, Wu L, Jian H, et al. Sintilimab plus chemotherapy for patients with EGFR-mutated non-squamous non-small-cell lung cancer with disease progression after EGFR tyrosine-kinase inhibitor therapy (ORIENT-31): second interim analysis from a double-blind, randomised, placebo-controlled, phase 3 trial. *The Lancet Respiratory Medicine.* 2023;11(7):624-636. doi:10.1016/S2213-2600(23)00135-2
132. Zhou C, Wang Z, Sun Y, et al. Sugemalimab versus placebo, in combination with platinum-based chemotherapy, as first-line treatment of metastatic non-small-cell lung cancer (GEMSTONE-302): interim and final analyses of a double-blind, randomised, phase 3 clinical trial. *The Lancet Oncology.* 2022;23(2):220-233. doi:10.1016/S1470-2045(21)00650-1
133. Zhou Q, Chen M, Jiang O, et al. Sugemalimab versus placebo after concurrent or sequential chemoradiotherapy in patients with locally advanced, unresectable, stage III non-small-cell lung cancer in China (GEMSTONE-301): interim results of a randomised, double-blind, multicentre, phase 3 trial. *The Lancet Oncology.* 2022;23(2):209-219. doi:10.1016/S1470-2045(21)00630-6
134. Huang H, Tao R, Hao S, et al. Sugemalimab Monotherapy for Patients With Relapsed or Refractory Extranodal Natural Killer/T-Cell Lymphoma (GEMSTONE-201): Results From a Single-Arm, Multicenter, Phase II Study. *JCO.* 2023;41(16):3032-3041. doi:10.1200/JCO.22.02367
135. Li J, Chen Z, Bai Y, et al. First-line sugemalimab with chemotherapy for advanced esophageal squamous cell carcinoma: a randomized phase 3 study. *Nat Med.* 2024;30(3):740-748. doi:10.1038/s41591-024-02797-y
136. Zhang X, Wang J, Wang G, et al. LBA79 GEMSTONE-303: Prespecified progression-free survival (PFS) and overall survival (OS) final analyses of a phase III study of sugemalimab plus chemotherapy vs placebo plus chemotherapy in treatment-naïve advanced gastric or gastroesophageal junction (G/GEJ) adenocarcinoma. *Annals of Oncology.* 2023;34:S1319. doi:10.1016/j.annonc.2023.10.080
137. Tang B, Chi Z, Chen Y, et al. Safety, Efficacy, and Biomarker Analysis of Toripalimab in Previously Treated Advanced Melanoma: Results of the POLARIS-01 Multicenter Phase II Trial. *Clinical Cancer Research.* 2020;26(16):4250-4259. doi:10.1158/1078-0432.CCR-19-3922
138. Sheng X, Chen H, Hu B, et al. Safety, Efficacy, and Biomarker Analysis of Toripalimab in Patients with Previously Treated Advanced Urothelial Carcinoma: Results from a Multicenter Phase II Trial POLARIS-03. *Clinical Cancer Research.* 2022;28(3):489-497. doi:10.1158/1078-0432.CCR-21-2210
139. Wang FH, Wei XL, Feng J, et al. Efficacy, Safety, and Correlative Biomarkers of Toripalimab in Previously Treated Recurrent or Metastatic Nasopharyngeal Carcinoma: A Phase II Clinical Trial (POLARIS-02). *JCO.* 2021;39(7):704-712. doi:10.1200/JCO.20.02712
140. Mai HQ, Chen QY, Chen D, et al. Toripalimab or placebo plus chemotherapy as first-line treatment in advanced nasopharyngeal carcinoma: a multicenter randomized phase 3 trial. *Nat Med.* 2021;27(9):1536-1543. doi:10.1038/s41591-021-01444-0

141. Wang ZX, Cui C, Yao J, et al. Toripalimab plus chemotherapy in treatment-naïve, advanced esophageal squamous cell carcinoma (JUPITER-06): A multi-center phase 3 trial. *Cancer Cell*. 2022;40(3):277-288.e3. doi:10.1016/j.ccell.2022.02.007
142. Wang Z, Wu L, Li B, et al. Toripalimab Plus Chemotherapy for Patients With Treatment-Naïve Advanced Non–Small-Cell Lung Cancer: A Multicenter Randomized Phase III Trial (CHOICE-01). *JCO*. 2023;41(3):651-663. doi:10.1200/JCO.22.00727
143. Lu S, Zhang W, Wu L, et al. Perioperative Toripalimab Plus Chemotherapy for Patients With Resectable Non–Small Cell Lung Cancer: The Neotorch Randomized Clinical Trial. *JAMA*. 2024;331(3):201. doi:10.1001/jama.2023.24735
144. Yan XQ, Ye MJ, Zou Q, et al. Toripalimab plus axitinib versus sunitinib as first-line treatment for advanced renal cell carcinoma: RENOTORCH, a randomized, open-label, phase III study. *Annals of Oncology*. 2024;35(2):190-199. doi:10.1016/j.annonc.2023.09.3108
145. Cheng Y, Liu Y, Zhang W, et al. LBA93 EXTENTORCH: A randomized, phase III trial of toripalimab versus placebo, in combination with chemotherapy as a first-line therapy for patients with extensive stage small cell lung cancer (ES-SCLC). *Annals of Oncology*. 2023;34:S1334. doi:10.1016/j.annonc.2023.10.096
146. Jiang Z, Ouyang Q, Sun T, et al. Toripalimab plus nab-paclitaxel in metastatic or recurrent triple-negative breast cancer: a randomized phase 3 trial. *Nat Med*. 2024;30(1):249-256. doi:10.1038/s41591-023-02677-x
147. Qin S, Li J, Zhong H, et al. Serplulimab, a novel anti-PD-1 antibody, in patients with microsatellite instability-high solid tumours: an open-label, single-arm, multicentre, phase II trial. *Br J Cancer*. 2022;127(12):2241-2248. doi:10.1038/s41416-022-02001-3
148. Zhou C, Hu Y, Arkania E, et al. A global phase 3 study of serplulimab plus chemotherapy as first-line treatment for advanced squamous non-small-cell lung cancer (ASTRUM-004). *Cancer Cell*. 2024;42(2):198-208.e3. doi:10.1016/j.ccell.2023.12.004
149. Cheng Y, Han L, Wu L, et al. Effect of First-Line Serplulimab vs Placebo Added to Chemotherapy on Survival in Patients With Extensive-Stage Small Cell Lung Cancer: The ASTRUM-005 Randomized Clinical Trial. *JAMA*. 2022;328(12):1223. doi:10.1001/jama.2022.16464
150. Song Y, Zhang B, Xin D, et al. First-line serplulimab or placebo plus chemotherapy in PD-L1-positive esophageal squamous cell carcinoma: a randomized, double-blind phase 3 trial. *Nat Med*. 2023;29(2):473-482. doi:10.1038/s41591-022-02179-2
151. Song Y, Zhou K, Jin C, et al. Penpulimab for Relapsed or Refractory Classical Hodgkin Lymphoma: A Multicenter, Single-Arm, Pivotal Phase I/II Trial (AK105-201). *Front Oncol*. 2022;12:925236. doi:10.3389/fonc.2022.925236
152. Zhong H, Sun S, Chen J, et al. First-line penpulimab combined with paclitaxel and carboplatin for metastatic squamous non-small-cell lung cancer in China (AK105-302): a multicentre, randomised, double-blind, placebo-controlled phase 3 clinical trial. *The Lancet Respiratory Medicine*. 2024;12(5):355-365. doi:10.1016/S2213-2600(23)00431-9
153. Chen X, Wang W, Zou Q, et al. Penpulimab, an anti-PD-1 antibody, for heavily pretreated metastatic nasopharyngeal carcinoma: a single-arm phase II study. *Sig Transduct Target Ther*. 2024;9(1):148. doi:10.1038/s41392-024-01865-6
154. Wang J, Zhou C, Yao W, et al. Adebrelimab or placebo plus carboplatin and etoposide as first-line treatment for extensive-stage small-cell lung cancer (CAPSTONE-1): a multicentre, randomised, double-blind, placebo-controlled, phase 3 trial. *The Lancet Oncology*. 2022;23(6):739-747. doi:10.1016/S1473-0245(22)00224-8
155. Escudier B, Szczylik C, Negrier S, et al. Sorafenib in Advanced Clear-Cell Renal-Cell Carcinoma. *N Engl J Med*. 2007;356:125- - 34.
156. Escudier B, Eisen T, Stadler WM, et al. Sorafenib for Treatment of Renal Cell Carcinoma: Final Efficacy and Safety Results of the Phase III Treatment Approaches in Renal Cancer Global Evaluation Trial. *JCO*. 2009;27(20):3312-3318. doi:10.1200/JCO.2008.19.5511
157. Llovet JM, Hilgard P, de Oliveira AC, et al. Sorafenib in Advanced Hepatocellular Carcinoma. *N Engl J Med*. 2008;359:378-390.
158. Brose MS, Nutting CM, Jarzab B, et al. Sorafenib in radioactive iodine-refractory, locally advanced or metastatic differentiated thyroid cancer: a randomised, double-blind, phase 3 trial. *The Lancet*. 2014;384(9940):319-328. doi:10.1016/S0140-6736(14)60421-9
159. Grothey A, Cutsem EV, Sobrero A, et al. Regorafenib monotherapy for previously treated metastatic colorectal cancer (CORRECT): an international, multicentre, randomised, placebo-controlled, phase 3 trial. *The Lancet*. 2013;381(9863):303-312. doi:10.1016/S0140-6736(12)61900-X
160. Demetri GD, Reichardt P, Kang YK, et al. Efficacy and safety of regorafenib for advanced gastrointestinal stromal tumours after failure of imatinib and sunitinib (GRID): an international, multicentre, randomised, placebo-controlled, phase 3 trial. *The Lancet*. 2013;381(9863):295-302. doi:10.1016/S0140-6736(12)61857-1
161. Bruix J, Qin S, Merle P, et al. Regorafenib for patients with hepatocellular carcinoma who progressed on sorafenib treatment (RESORCE): a randomised, double-blind, placebo-controlled, phase 3 trial. *The Lancet*. 2017;389(10064):56-66. doi:10.1016/S0140-6736(16)32453-9
162. Kudo M, Finn RS, Qin S, et al. Lenvatinib versus sorafenib in first-line treatment of patients with unresectable hepatocellular carcinoma: a randomised phase 3 non-inferiority trial. *The Lancet*. 2018;391(10126):1163-1173. doi:10.1016/S0140-6736(18)30207-1
163. Schlumberger M, Tahara M, Wirth LJ, et al. Lenvatinib versus Placebo in Radioiodine-Refractory Thyroid Cancer. *N Engl J Med*. 2015;372(7):621-630. doi:10.1056/NEJMoa1406470
164. Qin S, Bi F, Gu S, et al. Donafenib Versus Sorafenib in First-Line Treatment of Unresectable or Metastatic Hepatocellular Carcinoma: A Randomized, Open-Label, Parallel-Controlled Phase II-III Trial. *JCO*. 2021;39(27):3002-3011. doi:10.1200/JCO.21.00163
165. Lin Y, Qin S, Yang H, et al. Multicenter Randomized Double-Blind Phase III Trial of Donafenib in Progressive Radioactive Iodine-Refractory Differentiated Thyroid Cancer. *Clinical Cancer Research*. 2023;29(15):2791-2799. doi:10.1158/1078-0432.CCR-22-3613
166. Slamon DJ, Leyland-Jones B, Shak S, et al. Use of Chemotherapy plus a Monoclonal Antibody against HER2 for Metastatic Breast Cancer That Overexpresses HER2. *N Engl J Med*. 2001;344(11):783-792. doi:10.1056/NEJM200103153441101
167. Perez EA, Romond EH, Suman VJ, et al. Four-Year Follow-Up of Trastuzumab Plus Adjuvant Chemotherapy for Operable Human Epidermal Growth Factor Receptor 2–Positive Breast Cancer: Joint Analysis of Data From NCCTG N9831 and NSABP B-31. *JCO*. 2011;29(25):3366-3373. doi:10.1200/JCO.2011.35.0868
168. Bang YJ, Van Cutsem E, Feyereislova A, et al. Trastuzumab in combination with chemotherapy versus chemotherapy alone for treatment of HER2-positive advanced gastric or gastro-oesophageal junction cancer (ToGA): a phase 3, open-label, randomised controlled trial. *The Lancet*. 2010;376(9742):687-697. doi:10.1016/S0140-6736(10)61121-X
169. Li J, Qin S, Xu J, et al. Randomized, Double-Blind, Placebo-Controlled Phase III Trial of Apatinib in Patients With Chemotherapy-Refractory Advanced or Metastatic Adenocarcinoma of the Stomach or Gastroesophageal Junction. *JCO*. 2016;34(13):1448-1454. doi:10.1200/JCO.2015.63.5995
170. Qin S, Li Q, Gu S, et al. Apatinib as second-line or later therapy in patients with advanced hepatocellular carcinoma (AHELP): a multicentre, double-blind, randomised, placebo-controlled, phase 3 trial. *The Lancet Gastroenterology & Hepatology*. 2021;6(7):559-568. doi:10.1016/S2468-1253(21)00109-6
171. Peng Z, Liu T, Wei J, et al. Efficacy and safety of a novel anti-HER2 therapeutic antibody RC48 in patients with HER2-overexpressing, locally advanced or metastatic gastric or gastroesophageal junction cancer: a single-arm phase II study. *Cancer Communications*. 2021;41(11):1173-1182. doi:10.1002/cae2.12214

172. Sheng X, Wang L, He Z, et al. Efficacy and Safety of Disitamab Vedotin in Patients With Human Epidermal Growth Factor Receptor 2–Positive Locally Advanced or Metastatic Urothelial Carcinoma: A Combined Analysis of Two Phase II Clinical Trials. *JCO*. 2024;42(12):1391-1402. doi:10.1200/JCO.22.02912
173. Sheng X, Yang K, Ji Y, et al. Preliminary efficacy and safety results from RC48-C017: A phase II study of neoadjuvant treatment with disitamab vedotin plus toripalimab in patients with muscle invasive bladder cancer (MIBC) with HER2 expression. *JCO*. 2024;42(16\_suppl):4568-4568. doi:10.1200/JCO.2024.42.16\_suppl.4568
174. Wilke H, Muro K, Van Cutsem E, et al. Ramucirumab plus paclitaxel versus placebo plus paclitaxel in patients with previously treated advanced gastric or gastro-oesophageal junction adenocarcinoma (RAINBOW): a double-blind, randomised phase 3 trial. *The Lancet Oncology*. 2014;15(11):1224-1235. doi:10.1016/S1470-2045(14)70420-6
175. Zhu AX, Kang YK, Yen CJ, et al. Ramucirumab after sorafenib in patients with advanced hepatocellular carcinoma and increased  $\alpha$ -fetoprotein concentrations (REACH-2): a randomised, double-blind, placebo-controlled, phase 3 trial. *The Lancet Oncology*. 2019;20(2):282-296. doi:10.1016/S1470-2045(18)30937-9
176. O'Brien SG, Guilhot F, Larson RA, et al. Imatinib Compared with Interferon and Low-Dose Cytarabine for Newly Diagnosed Chronic-Phase Chronic Myeloid Leukemia. *N Engl J Med*. 2003;348(11):994-1004. doi:10.1056/NEJMoa022457
177. Talpaz M, Silver RT, Druker BJ, et al. Imatinib induces durable hematologic and cytogenetic responses in patients with accelerated phase chronic myeloid leukemia: results of a phase 2 study. *Blood*. 2002;99(6):1928-1937. doi:10.1182/blood.V99.6.1928
178. Sawyers CL, Hochhaus A, Feldman E, et al. Imatinib induces hematologic and cytogenetic responses in patients with chronic myelogenous leukemia in myeloid blast crisis: results of a phase II study: Presented in part at the 43rd Annual Meeting of The American Society of Hematology, Orlando, FL, December 11, 2001. *Blood*. 2002;99(10):3530-3539. doi:10.1182/blood.V99.10.3530
179. Demetri GD, Von Mehren M, Blanke CD, et al. Efficacy and Safety of Imatinib Mesylate in Advanced Gastrointestinal Stromal Tumors. *N Engl J Med*. 2002;347(7):472-480. doi:10.1056/NEJMoa020461
180. Schultz KR, Bowman WP, Aledo A, et al. Improved Early Event-Free Survival With Imatinib in Philadelphia Chromosome–Positive Acute Lymphoblastic Leukemia: A Children's Oncology Group Study. *JCO*. 2009;27(31):5175-5181. doi:10.1200/JCO.2008.21.2514
181. Wassmann B, Pfeifer H, Scheuring UJ, et al. Early prediction of response in patients with relapsed or refractory Philadelphia chromosome–positive acute lymphoblastic leukemia (Ph+ALL) treated with imatinib. *Blood*. 2004;103(4):1495-1498. doi:10.1182/blood-2003-01-0154
182. Heinrich MC, Joensuu H, Demetri GD, et al. Phase II, Open-Label Study Evaluating the Activity of Imatinib in Treating Life-Threatening Malignancies Known to Be Associated with Imatinib-Sensitive Tyrosine Kinases. *Clinical Cancer Research*. 2008;14(9):2717-2725. doi:10.1158/1078-0432.CCR-07-4575
183. DeMatteo RP, Ballman KV, Antonescu CR, et al. Adjuvant imatinib mesylate after resection of localised, primary gastrointestinal stromal tumour: a randomised, double-blind, placebo-controlled trial. *The Lancet*. 2009;373(9669):1097-1104. doi:10.1016/S0140-6736(09)60500-6
184. Motzer Robert J., Hutson Thomas E., Tomczak Piotr, et al. Sunitinib versus Interferon Alfa in Metastatic Renal-Cell Carcinoma. *N Engl J Med*. 2007;356(2):115-124. doi:10.1056/NEJMoa065044
185. Demetri GD, Oosterom AT van, Garrett CR, et al. Efficacy and safety of sunitinib in patients with advanced gastrointestinal stromal tumour after failure of imatinib: a randomised controlled trial. *The Lancet*. 2006;368(9544):1329-1338. doi:10.1016/S0140-6736(06)69446-4
186. Raymond Eric, Dahan Laetitia, Raoul Jean-Luc, et al. Sunitinib Malate for the Treatment of Pancreatic Neuroendocrine Tumors. *N Engl J Med*. 2011;364(6):501-513. doi:10.1056/NEJMoa1003825
187. Heinrich MC, Jones RL, Von Mehren M, et al. Avapritinib in advanced PDGFRA D842V-mutant gastrointestinal stromal tumour (NAVIGATOR): a multicentre, open-label, phase 1 trial. *The Lancet Oncology*. 2020;21(7):935-946. doi:10.1016/S1470-2045(20)30269-2
188. Blay JY, Serrano C, Heinrich MC, et al. Ripretinib in patients with advanced gastrointestinal stromal tumours (INVICTUS): a double-blind, randomised, placebo-controlled, phase 3 trial. *The Lancet Oncology*. 2020;21(7):923-934. doi:10.1016/S1470-2045(20)30168-6
189. Xu J, Shen L, Zhou Z, et al. Surufatinib in advanced extrapancreatic neuroendocrine tumours (SANET-ep): a randomised, double-blind, placebo-controlled, phase 3 study. *The Lancet Oncology*. 2020;21(11):1500-1512. doi:10.1016/S1470-2045(20)30496-4
190. Qin S, Li J, Wang L, et al. Efficacy and Tolerability of First-Line Cetuximab Plus Leucovorin, Fluorouracil, and Oxaliplatin (FOLFOX-4) Versus FOLFOX-4 in Patients With *RAS* Wild-Type Metastatic Colorectal Cancer: The Open-Label, Randomized, Phase III TAILOR Trial. *JCO*. 2018;36(30):3031-3039. doi:10.1200/JCO.2018.78.3183
191. Vermorken JB, Mesia R, Rivera F, et al. Platinum-Based Chemotherapy plus Cetuximab in Head and Neck Cancer. *N Engl J Med*. 2008;359(11):1116-1127. doi:10.1056/NEJMoa0802656
192. Bonner James A., Harari Paul M., Giralt Jordi, et al. Radiotherapy plus Cetuximab for Squamous-Cell Carcinoma of the Head and Neck. *N Engl J Med*. 2006;354(6):567-578. doi:10.1056/NEJMoa053422
193. Li J, Qin S, Xu RH, et al. Effect of Fruquintinib vs Placebo on Overall Survival in Patients With Previously Treated Metastatic Colorectal Cancer: The FRESCO Randomized Clinical Trial. *JAMA*. 2018;319(24):2486. doi:10.1001/jama.2018.7855
194. Li J, Deng Y, Zhang W, et al. Subcutaneous envafolimab monotherapy in patients with advanced defective mismatch repair/microsatellite instability high solid tumors. *J Hematol Oncol*. 2021;14(1):95. doi:10.1186/s13045-021-01095-1
195. Hong DS, DuBois SG, Kummar S, et al. Larotrectinib in patients with TRK fusion-positive solid tumours: a pooled analysis of three phase 1/2 clinical trials. *The Lancet Oncology*. 2020;21(4):531-540. doi:10.1016/S1470-2045(19)30856-3
196. Zhang B, Song Y, Luo S, et al. Pucotenlimab in patients with advanced mismatch repair-deficient or microsatellite instability-high solid tumors: A multicenter phase 2 study. *Cell Reports Medicine*. 2023;4(12):101301. doi:10.1016/j.xcrm.2023.101301
197. Cui C, Chen Y, Luo Z, et al. Safety and efficacy of Pucotenlimab (HX008) - a humanized immunoglobulin G4 monoclonal antibody in patients with locally advanced or metastatic melanoma: a single-arm, multicenter, phase II study. *BMC Cancer*. 2023;23(1):121. doi:10.1186/s12885-022-10473-y
198. Abou-Alfa GK, Sahai V, Hollebecque A, et al. Pemigatinib for previously treated, locally advanced or metastatic cholangiocarcinoma: a multicentre, open-label, phase 2 study. *The Lancet Oncology*. 2020;21(5):671-684. doi:10.1016/S1470-2045(20)30109-1
199. Shah NP, Kantarjian HM, Kim DW, et al. Intermittent Target Inhibition With Dasatinib 100 mg Once Daily Preserves Efficacy and Improves Tolerability in Imatinib-Resistant and -Intolerant Chronic-Phase Chronic Myeloid Leukemia. *JCO*. 2008;26(19):3204-3212. doi:10.1200/JCO.2007.14.9260
200. Shah NP, Guilhot F, Cortes JE, et al. Long-term outcome with dasatinib after imatinib failure in chronic-phase chronic myeloid leukemia: follow-up of a phase 3 study. *Blood*. 2014;123(15):2317-2324. doi:10.1182/blood-2013-10-532341
201. Shah NP, Rousselot P, Schiffer C, et al. Dasatinib in imatinib-resistant or -intolerant chronic-phase, chronic myeloid leukemia patients: 7-year follow-up of study CA180-034. *American J Hematol*. 2016;91(9):869-874. doi:10.1002/ajh.24423
202. Kantarjian HM, Giles FJ, Bhalla KN, et al. Nilotinib is effective in patients with chronic myeloid leukemia in chronic phase after imatinib resistance or intolerance: 24-month follow-up results. *Blood*. 2011;117(4):1141-1145. doi:10.1182/blood-2010-03-277152

203. Saglio G, Kim DW, Issaragrisil S, et al. Nilotinib versus Imatinib for Newly Diagnosed Chronic Myeloid Leukemia. *N Engl J Med.* 2010;362(24):2251-2259. doi:10.1056/NEJMoa0912614
204. Kantarjian HM, Hochhaus A, Saglio G, et al. Nilotinib versus imatinib for the treatment of patients with newly diagnosed chronic phase, Philadelphia chromosome-positive, chronic myeloid leukaemia: 24-month minimum follow-up of the phase 3 randomised ENESTnd trial. *The Lancet Oncology.* 2011;12(9):841-851. doi:10.1016/S1470-2045(11)70201-7
205. Hijjiya N, Maschan A, Rizzari C, et al. Phase 2 study of nilotinib in pediatric patients with Philadelphia chromosome–positive chronic myeloid leukemia. *Blood.* 2019;134(23):2036-2045. doi:10.1182/blood.2019000069
206. Jiang Q, Li Z, Qin Y, et al. Olverembatinib (HQP1351), a well-tolerated and effective tyrosine kinase inhibitor for patients with T315I-mutated chronic myeloid leukemia: results of an open-label, multicenter phase 1/2 trial. *J Hematol Oncol.* 2022;15(1):113. doi:10.1186/s13045-022-01334-z
207. Zhang L, Meng L, Liu B, et al. Flumatinib versus Imatinib for Newly Diagnosed Chronic Phase Chronic Myeloid Leukemia: A Phase III, Randomized, Open-label, Multi-center FESnd Study. *Clinical Cancer Research.* 2021;27(1):70-77. doi:10.1158/1078-0432.CCR-20-1600
208. Dreyling M, Jurezak W, Jerkeman M, et al. Ibrutinib versus temsirolimus in patients with relapsed or refractory mantle-cell lymphoma: an international, randomised, open-label, phase 3 study. *The Lancet.* 2016;387(10020):770-778. doi:10.1016/S0140-6736(15)00667-4
209. Byrd JC, Brown JR, O’Brien S, et al. Ibrutinib versus Ofatumumab in Previously Treated Chronic Lymphoid Leukemia. *N Engl J Med.* 2014;371(3):213-223. doi:10.1056/NEJMoa1400376
210. Treon SP, Tripsas CK, Meid K, et al. Ibrutinib in Previously Treated Waldenström’s Macroglobulinemia. *N Engl J Med.* 2015;372(15):1430-1440. doi:10.1056/NEJMoa1501548
211. Dimopoulos MA, Tedeschi A, Trotman J, et al. Phase 3 Trial of Ibrutinib plus Rituximab in Waldenström’s Macroglobulinemia. *N Engl J Med.* 2018;378(25):2399-2410. doi:10.1056/NEJMoa1802917
212. Song Y, Zhou K, Zou D, et al. Treatment of Patients with Relapsed or Refractory Mantle–Cell Lymphoma with Zanubrutinib, a Selective Inhibitor of Bruton’s Tyrosine Kinase. *Clinical Cancer Research.* 2020;26(16):4216-4224. doi:10.1158/1078-0432.CCR-19-3703
213. Xu W, Yang S, Zhou K, et al. Treatment of relapsed/refractory chronic lymphocytic leukemia/small lymphocytic lymphoma with the BTK inhibitor zanubrutinib: phase 2, single-arm, multicenter study. *J Hematol Oncol.* 2020;13(1):48. doi:10.1186/s13045-020-00884-4
214. An G, Zhou D, Cheng S, et al. A Phase II Trial of the Bruton Tyrosine-Kinase Inhibitor Zanubrutinib (BGB-3111) in Patients with Relapsed/Refractory Waldenström Macroglobulinemia. *Clinical Cancer Research.* 2021;27(20):5492-5501. doi:10.1158/1078-0432.CCR-21-0539
215. Tam CS, Brown JR, Kahl BS, et al. Zanubrutinib versus bendamustine and rituximab in untreated chronic lymphocytic leukaemia and small lymphocytic lymphoma (SEQUOIA): a randomised, controlled, phase 3 trial. *The Lancet Oncology.* 2022;23(8):1031-1043. doi:10.1016/S1470-2045(22)00293-5
216. Deng LJ, Zhou KS, Liu LH, et al. Orelabrutinib for the treatment of relapsed or refractory MCL: a phase 1/2, open-label, multicenter, single-arm study. *Blood Advances.* 2023;7(16):4349-4357. doi:10.1182/bloodadvances.2022009168
217. Xu W, Zhou K, Wang T, et al. Orelabrutinib in relapsed or refractory chronic lymphocytic leukemia/small lymphocytic lymphoma patients: Multi-center, single-arm, open-label, phase 2 study. *American J Hematol.* 2023;98(4):571-579. doi:10.1002/ajh.26826
218. Deng L, Li Z, Zhang H, et al. Orelabrutinib for the treatment of relapsed or refractory marginal zone lymphoma: A phase 2, multicenter, open-label study. *American J Hematol.* 2023;98(11):1742-1750. doi:10.1002/ajh.27064
219. APEX (Assessment of Proteasome inhibition for Extending remissions) trial: phase III randomized, multicenter, placebo-controlled trial to evaluate the efficacy and safety of bortezomib versus dexamethasone in patients with recurrent or treatment-resistant multiple myeloma. *Clin Adv Hematol Oncol.* 2003;1(3):190.
220. San Miguel Jesús F., Schlag Rudolf, Khuageva Nuriet K., et al. Bortezomib plus Melphalan and Prednisone for Initial Treatment of Multiple Myeloma. *N Engl J Med.* 2008;359(9):906-917. doi:10.1056/NEJMoa0801479
221. Fisher RI, Bernstein SH, Kahl BS, et al. Multicenter Phase II Study of Bortezomib in Patients With Relapsed or Refractory Mantle Cell Lymphoma. *JCO.* 2006;24(30):4867-4874. doi:10.1200/JCO.2006.07.9665
222. Robak T, Huang H, Jin J, et al. Bortezomib-Based Therapy for Newly Diagnosed Mantle-Cell Lymphoma. *N Engl J Med.* 2015;372(10):944-953. doi:10.1056/NEJMoa1412096
223. Du J, Fang B, Li J, et al. A study of carfilzomib and dexamethasone in patients with relapsed and refractory multiple myeloma in China. *Int J Hematol.* 2021;113(3):422-429. doi:10.1007/s12185-020-03044-z
224. Moreau P, Masszi T, Grzasko N, et al. Oral Ixazomib, Lenalidomide, and Dexamethasone for Multiple Myeloma. *N Engl J Med.* 2016;374(17):1621-1634. doi:10.1056/NEJMoa1516282
225. Weber DM, Chen C, Niesvizky R, et al. Lenalidomide plus Dexamethasone for Relapsed Multiple Myeloma in North America. *N Engl J Med.* 2007;357(21):2133-2142. doi:10.1056/NEJMoa070596
226. Benboubker L, Dimopoulos MA, Dispenzieri A, et al. Lenalidomide and Dexamethasone in Transplant-Ineligible Patients with Myeloma. *N Engl J Med.* 2014;371(10):906-917. doi:10.1056/NEJMoa1402551
227. Leonard JP, Trneny M, Izutsu K, et al. AUGMENT: A Phase III Study of Lenalidomide Plus Rituximab Versus Placebo Plus Rituximab in Relapsed or Refractory Indolent Lymphoma. *JCO.* 2019;37(14):1188-1199. doi:10.1200/JCO.19.00010
228. Miguel JS, Weisel K, Moreau P, et al. Pomalidomide plus low-dose dexamethasone versus high-dose dexamethasone alone for patients with relapsed and refractory multiple myeloma (MM-003): a randomised, open-label, phase 3 trial. *The Lancet Oncology.* 2013;14(11):1055-1066. doi:10.1016/S1470-2045(13)70380-2
229. Lonial S, Weiss BM, Usmani SZ, et al. Daratumumab monotherapy in patients with treatment-refractory multiple myeloma (SIRIUS): an open-label, randomised, phase 2 trial. *The Lancet.* 2016;387(10027):1551-1560. doi:10.1016/S0140-6736(15)01120-4
230. Palumbo A, Chanan-Khan A, Weisel K, et al. Daratumumab, Bortezomib, and Dexamethasone for Multiple Myeloma. *N Engl J Med.* 2016;375(8):754-766. doi:10.1056/NEJMoa1606038
231. Mateos MV, Cavo M, Blade J, et al. Overall survival with daratumumab, bortezomib, melphalan, and prednisone in newly diagnosed multiple myeloma (ALCYONE): a randomised, open-label, phase 3 trial. *The Lancet.* 2020;395(10218):132-141. doi:10.1016/S0140-6736(19)32956-3
232. Vogl DT, Dingli D, Cornell RF, et al. Selective Inhibition of Nuclear Export With Oral Selinexor for Treatment of Relapsed or Refractory Multiple Myeloma. *JCO.* 2018;36(9):859-866. doi:10.1200/JCO.2017.75.5207
233. Perl AE, Martinelli G, Cortes JE, et al. Gilteritinib or Chemotherapy for Relapsed or Refractory *FLT3* -Mutated AML. *N Engl J Med.* 2019;381(18):1728-1740. doi:10.1056/NEJMoa1902688
234. DiNardo CD, Jonas BA, Pullarkat V, et al. Azacitidine and Venetoclax in Previously Untreated Acute Myeloid Leukemia. *N Engl J Med.* 2020;383(7):617-629. doi:10.1056/NEJMoa2012971
235. Norsworthy KJ, Luo L, Hsu V, et al. FDA Approval Summary: Ivosidenib for Relapsed or Refractory Acute Myeloid Leukemia with an Isocitrate Dehydrogenase-1 Mutation. *Clinical Cancer Research.* 2019;25(11):3205-3209. doi:10.1158/1078-0432.CCR-18-3749

236. Kantarjian H, Stein A, Gökbuget N, et al. Blinatumomab versus Chemotherapy for Advanced Acute Lymphoblastic Leukemia. *N Engl J Med.* 2017;376(9):836-847. doi:10.1056/NEJMoa1609783
237. Locatelli F, Zugmaier G, Rizzari C, et al. Effect of Blinatumomab vs Chemotherapy on Event-Free Survival Among Children With High-risk First-Relapse B-Cell Acute Lymphoblastic Leukemia: A Randomized Clinical Trial. *JAMA.* 2021;325(9):843. doi:10.1001/jama.2021.0987
238. Lin N, Zhang M, Bai H, et al. Efficacy and safety of GLS-010 (zimberelimab) in patients with relapsed or refractory classical Hodgkin lymphoma: A multicenter, single-arm, phase II study. *European Journal of Cancer.* 2022;164:117-126. doi:10.1016/j.ejca.2021.07.021
239. Xia L, Wang J, Wang C, et al. Efficacy and safety of zimberelimab (GLS-010) monotherapy in patients with recurrent or metastatic cervical cancer: a multicenter, single-arm, phase II study. *International Journal of Gynecological Cancer.* 2023;33(12):1861-1868. doi:10.1136/ijgc-2023-004705
240. Salles G, Seymour JF, Offner F, et al. Rituximab maintenance for 2 years in patients with high tumour burden follicular lymphoma responding to rituximab plus chemotherapy (PRIMA): a phase 3, randomised controlled trial. *The Lancet.* 2011;377(9759):42-51. doi:10.1016/S0140-6736(10)62175-7
241. Van Oers MHJ, Klasa R, Marcus RE, et al. Rituximab maintenance improves clinical outcome of relapsed/resistant follicular non-Hodgkin lymphoma in patients both with and without rituximab during induction: results of a prospective randomized phase 3 intergroup trial. *Blood.* 2006;108(10):3295-3301. doi:10.1182/blood-2006-05-021113
242. Chiappella A, Martelli M, Angelucci E, et al. Rituximab-dose-dense chemotherapy with or without high-dose chemotherapy plus autologous stem-cell transplantation in high-risk diffuse large B-cell lymphoma (DLCL04): final results of a multicentre, open-label, randomised, controlled, phase 3 study. *The Lancet Oncology.* 2017;18(8):1076-1088. doi:10.1016/S1470-2045(17)30444-8
243. Hallek M, Fischer K, Fingerle-Rowson G, et al. Addition of rituximab to fludarabine and cyclophosphamide in patients with chronic lymphocytic leukaemia: a randomised, open-label, phase 3 trial. *The Lancet.* 2010;376(9747):1164-1174. doi:10.1016/S0140-6736(10)61381-5
244. Shi Y, Zhang Q, Hong X, et al. Comparison of efficacy and safety of ripertamab (SCT400) versus rituximab (Mabthera<sup>®</sup>) in combination with CHOP in patients with previously untreated CD20-positive diffuse large B-cell lymphoma: A randomized, single-blind, phase III clinical trial. *Hematological Oncology.* 2022;40(5):930-940. doi:10.1002/hon.3054
245. Marcus R, Davies A, Ando K, et al. Obinutuzumab for the First-Line Treatment of Follicular Lymphoma. *N Engl J Med.* 2017;377(14):1331-1344. doi:10.1056/NEJMoa1614598
246. Tilly H, Morschhauser F, Sehn LH, et al. Polatuzumab Vedotin in Previously Untreated Diffuse Large B-Cell Lymphoma. *N Engl J Med.* 2022;386(4):351-363. doi:10.1056/NEJMoa2115304
247. Sehn LH, Herrera AF, Flowers CR, et al. Polatuzumab Vedotin in Relapsed or Refractory Diffuse Large B-Cell Lymphoma. *JCO.* 2020;38(2):155-165. doi:10.1200/JCO.19.00172
248. Sehn LH, Hertzberg M, Opat S, et al. Polatuzumab vedotin plus bendamustine and rituximab in relapsed/refractory DLBCL: survival update and new extension cohort data. *Blood Advances.* 2022;6(2):533-543. doi:10.1182/bloodadvances.2021005794
249. Pro B, Advani R, Brice P, et al. Five-year results of brentuximab vedotin in patients with relapsed or refractory systemic anaplastic large cell lymphoma. *Blood.* 2017;130(25):2709-2717. doi:10.1182/blood-2017-05-780049
250. Chen R, Gopal AK, Smith SE, et al. Five-year survival and durability results of brentuximab vedotin in patients with relapsed or refractory Hodgkin lymphoma. *Blood.* 2016;128(12):1562-1566. doi:10.1182/blood-2016-02-699850
251. Prince HM, Kim YH, Horwitz SM, et al. Brentuximab vedotin or physician's choice in CD30-positive cutaneous T-cell lymphoma (ALCANZA): an international, open-label, randomised, phase 3, multicentre trial. *The Lancet.* 2017;390(10094):555-566. doi:10.1016/S0140-6736(17)31266-7
252. Kantarjian HM, DeAngelo DJ, Stelljes M, et al. Inotuzumab Ozogamicin versus Standard Therapy for Acute Lymphoblastic Leukemia. *N Engl J Med.* 2016;375(8):740-753. doi:10.1056/NEJMoa1509277
253. Shi Y, Dong M, Hong X, et al. Results from a multicenter, open-label, pivotal phase II study of chidamide in relapsed or refractory peripheral T-cell lymphoma. *Annals of Oncology.* 2015;26(8):1766-1771. doi:10.1093/annonc/mdv237
254. Jiang Z, Li W, Hu X, et al. Tucidinosat plus exemestane for postmenopausal patients with advanced, hormone receptor-positive breast cancer (ACE): a randomised, double-blind, placebo-controlled, phase 3 trial. *The Lancet Oncology.* 2019;20(6):806-815. doi:10.1016/S1470-2045(19)30164-0
255. Wang T, Sun X, Qiu L, et al. The Oral PI3Kd Inhibitor Linperlisib for the Treatment of Relapsed and/or Refractory Follicular Lymphoma: A Phase II, Single-Arm, Open-Label Clinical Trial. *CLINICAL CANCER RESEARCH.*
256. Mesa RA, Gotlib J, Gupta V, et al. Effect of Ruxolitinib Therapy on Myelofibrosis-Related Symptoms and Other Patient-Reported Outcomes in COMFORT-I: A Randomized, Double-Blind, Placebo-Controlled Trial. *JCO.* 2013;31(10):1285-1292. doi:10.1200/JCO.2012.44.4489
257. Kim YH, Bagot M, Pinter-Brown L, et al. Mogamulizumab versus vorinostat in previously treated cutaneous T-cell lymphoma (MAVORIC): an international, open-label, randomised, controlled phase 3 trial. *The Lancet Oncology.* 2018;19(9):1192-1204. doi:10.1016/S1470-2045(18)30379-6
258. Van Rhee F, Wong RS, Munshi N, et al. Siltuximab for multicentric Castleman's disease: a randomised, double-blind, placebo-controlled trial. *The Lancet Oncology.* 2014;15(9):966-974. doi:10.1016/S1470-2045(14)70319-5
259. Sternberg CN, Davis ID, Mardiak J, et al. Pazopanib in Locally Advanced or Metastatic Renal Cell Carcinoma: Results of a Randomized Phase III Trial. *JCO.* 2010;28(6):1061-1068. doi:10.1200/JCO.2009.23.9764
260. Rini BI, Escudier B, Tomczak P, et al. Comparative effectiveness of axitinib versus sorafenib in advanced renal cell carcinoma (AXIS): a randomised phase 3 trial. *The Lancet.* 2011;378(9807):1931-1939. doi:10.1016/S0140-6736(11)61613-9
261. de Bono Johann S., Logothetis Christopher J., Molina Arturo, et al. Abiraterone and Increased Survival in Metastatic Prostate Cancer. *N Engl J Med.* 2011;364(21):1995-2005. doi:10.1056/NEJMoa1014618
262. Fizazi K, Tran N, Fein L, et al. Abiraterone plus Prednisone in Metastatic, Castration-Sensitive Prostate Cancer. *N Engl J Med.* 2017;377(4):352-360. doi:10.1056/NEJMoa1704174
263. Smith MR, Saad F, Chowdhury S, et al. Apalutamide Treatment and Metastasis-free Survival in Prostate Cancer. *N Engl J Med.* 2018;378(15):1408-1418. doi:10.1056/NEJMoa1715546
264. Chi KN, Agarwal N, Bjartell A, et al. Apalutamide for Metastatic, Castration-Sensitive Prostate Cancer. *N Engl J Med.* 2019;381(1):13-24. doi:10.1056/NEJMoa1903307
265. Beer TM, Armstrong AJ, Rathkopf DE, et al. Enzalutamide in Metastatic Prostate Cancer before Chemotherapy. *N Engl J Med.* 2014;371(5):424-433. doi:10.1056/NEJMoa1405095
266. Hussain M, Fizazi K, Saad F, et al. Enzalutamide in Men with Nonmetastatic, Castration-Resistant Prostate Cancer. *N Engl J Med.* 2018;378(26):2465-2474. doi:10.1056/NEJMoa1800536
267. Armstrong AJ, Szmulewitz RZ, Petrylak DP, et al. ARCHES: A Randomized, Phase III Study of Androgen Deprivation Therapy With Enzalutamide or Placebo in Men With Metastatic Hormone-Sensitive Prostate Cancer. *JCO.* 2019;37(32):2974-2986. doi:10.1200/JCO.19.00799

268. Fizazi K, Shore N, Tammela TL, et al. Darolutamide in Nonmetastatic, Castration-Resistant Prostate Cancer. *N Engl J Med*. 2019;380(13):1235-1246. doi:10.1056/NEJMoa1815671
269. Smith MR, Hussain M, Saad F, et al. Darolutamide and Survival in Metastatic, Hormone-Sensitive Prostate Cancer. *N Engl J Med*. 2022;386(12):1132-1142. doi:10.1056/NEJMoa2119115
270. Gu W, Han W, Luo H, et al. Rezvilutamide versus bicalutamide in combination with androgen-deprivation therapy in patients with high-volume, metastatic, hormone-sensitive prostate cancer (CHART): a randomised, open-label, phase 3 trial. *The Lancet Oncology*. 2022;23(10):1249-1260. doi:10.1016/S1470-2045(22)00507-1
271. Pujade-Lauraine E, Ledermann JA, Selle F, et al. Olaparib tablets as maintenance therapy in patients with platinum-sensitive, relapsed ovarian cancer and a BRCA1/2 mutation (SOLO2/ENGOT-Ov21): a double-blind, randomised, placebo-controlled, phase 3 trial. *The Lancet Oncology*. 2017;18(9):1274-1284. doi:10.1016/S1470-2045(17)30469-2
272. Moore K, Colombo N, Scambia G, et al. Maintenance Olaparib in Patients with Newly Diagnosed Advanced Ovarian Cancer. *N Engl J Med*. 2018;379(26):2495-2505. doi:10.1056/NEJMoa1810858
273. De Bono J, Mateo J, Fizazi K, et al. Olaparib for Metastatic Castration-Resistant Prostate Cancer. *N Engl J Med*. 2020;382(22):2091-2102. doi:10.1056/NEJMoa1911440
274. Ray-Coquard I, Pautier P, Pignata S, et al. Olaparib plus Bevacizumab as First-Line Maintenance in Ovarian Cancer. *N Engl J Med*. 2019;381(25):2416-2428. doi:10.1056/NEJMoa1911361
275. Von Minckwitz G, Huang CS, Mano MS, et al. Trastuzumab Emtansine for Residual Invasive HER2-Positive Breast Cancer. *N Engl J Med*. 2019;380(7):617-628. doi:10.1056/NEJMoa1814017
276. Verma S, Miles D, Gianni L, et al. Trastuzumab Emtansine for HER2-Positive Advanced Breast Cancer. *N Engl J Med*. 2012;367(19):1783-1791. doi:10.1056/NEJMoa1209124
277. Von Minckwitz G, Procter M, De Azambuja E, et al. Adjuvant Pertuzumab and Trastuzumab in Early HER2-Positive Breast Cancer. *N Engl J Med*. 2017;377(2):122-131. doi:10.1056/NEJMoa1703643
278. Shao Z, Pang D, Yang H, et al. Efficacy, Safety, and Tolerability of Pertuzumab, Trastuzumab, and Docetaxel for Patients With Early or Locally Advanced ERBB2-Positive Breast Cancer in Asia: The PEONY Phase 3 Randomized Clinical Trial. *JAMA Oncol*. 2020;6(3):e193692. doi:10.1001/jamaoncol.2019.3692
279. Swain SM, Baselga J, Kim SB, et al. Pertuzumab, Trastuzumab, and Docetaxel in HER2-Positive Metastatic Breast Cancer. *N Engl J Med*. 2015;372(8):724-734. doi:10.1056/NEJMoa1413513
280. Cortés J, Kim SB, Chung WP, et al. Trastuzumab Deruxtecan versus Trastuzumab Emtansine for Breast Cancer. *N Engl J Med*. 2022;386(12):1143-1154. doi:10.1056/NEJMoa2115022
281. Modi S, Jacot W, Yamashita T, et al. Trastuzumab Deruxtecan in Previously Treated HER2-Low Advanced Breast Cancer. *N Engl J Med*. 2022;387(1):9-20. doi:10.1056/NEJMoa2203690
282. Bian L, Xu BH, Di LJ, et al. Phase III randomized controlled, multicenter, prospective study of recombinant anti-HER2 humanized monoclonal antibody (Cipterbin) combined with vinorelbine in patients with HER2 positive metastatic breast cancer: the HOPES Study. *Natl Med J China*. 2020;100(30):2351-2357. doi:10.3760/cma.j.cn112137-20200116-00105
283. Geyer Charles E., Forster John, Lindquist Deborah, et al. Lapatinib plus Capecitabine for HER2-Positive Advanced Breast Cancer. *New England Journal of Medicine*. 2006;355(26):2733-2743. doi:10.1056/NEJMoa064320
284. Ma F, Ouyang Q, Li W, et al. Pyrotinib or Lapatinib Combined With Capecitabine in HER2-Positive Metastatic Breast Cancer With Prior Taxanes, Anthracyclines, and/or Trastuzumab: A Randomized, Phase II Study. *JCO*. 2019;37(29):2610-2619. doi:10.1200/JCO.19.00108
285. Wu J, Jiang Z, Liu Z, et al. Neoadjuvant pyrotinib, trastuzumab, and docetaxel for HER2-positive breast cancer (PHEDRA): a double-blind, randomized phase 3 trial. *BMC Med*. 2022;20(1):498. doi:10.1186/s12916-022-02708-3
286. Ma F, Yan M, Li W, et al. Pyrotinib versus placebo in combination with trastuzumab and docetaxel as first line treatment in patients with HER2 positive metastatic breast cancer (PHILA): randomised, double blind, multicentre, phase 3 trial. *BMJ*. Published online October 31, 2023:e076065. doi:10.1136/bmj-2023-076065
287. Martin M, Holmes FA, Ejlertsen B, et al. Neratinib after trastuzumab-based adjuvant therapy in HER2-positive breast cancer (ExteNET): 5-year analysis of a randomised, double-blind, placebo-controlled, phase 3 trial. *The Lancet Oncology*. 2017;18(12):1688-1700. doi:10.1016/S1470-2045(17)30717-9
288. Finn RS, Martin M, Rugo HS, et al. Palbociclib and Letrozole in Advanced Breast Cancer. *N Engl J Med*. 2016;375(20):1925-1936. doi:10.1056/NEJMoa1607303
289. Johnston S, Martin M, Di Leo A, et al. MONARCH 3 final PFS: a randomized study of abemaciclib as initial therapy for advanced breast cancer. *npj Breast Cancer*. 2019;5(1):5. doi:10.1038/s41523-018-0097-z
290. Sledge GW, Toi M, Neven P, et al. The Effect of Abemaciclib Plus Fulvestrant on Overall Survival in Hormone Receptor-Positive, ERBB2-Negative Breast Cancer That Progressed on Endocrine Therapy—MONARCH 2: A Randomized Clinical Trial. *JAMA Oncol*. 2020;6(1):116. doi:10.1001/jamaoncol.2019.4782
291. Johnston SRD, Harbeck N, Hegg R, et al. Abemaciclib Combined With Endocrine Therapy for the Adjuvant Treatment of HR+, HER2-, Node-Positive, High-Risk, Early Breast Cancer (monarchE). *JCO*. 2020;38(34):3987-3998. doi:10.1200/JCO.20.02514
292. Xu B, Zhang Q, Zhang P, et al. Dalpiciclib or placebo plus fulvestrant in hormone receptor-positive and HER2-negative advanced breast cancer: a randomized, phase 3 trial. *Nat Med*. 2021;27(11):1904-1909. doi:10.1038/s41591-021-01562-9
293. Zhang P, Zhang Q, Tong Z, et al. Dalpiciclib plus letrozole or anastrozole versus placebo plus letrozole or anastrozole as first-line treatment in patients with hormone receptor-positive, HER2-negative advanced breast cancer (DAWNA-2): a multicentre, randomised, double-blind, placebo-controlled, phase 3 trial. *The Lancet Oncology*. 2023;24(6):646-657. doi:10.1016/S1470-2045(23)00172-9
294. Tripathy D, Im SA, Colleoni M, et al. Ribociclib plus endocrine therapy for premenopausal women with hormone-receptor-positive, advanced breast cancer (MONALEESA-7): a randomised phase 3 trial. *The Lancet Oncology*. 2018;19(7):904-915. doi:10.1016/S1470-2045(18)30292-4
295. Hortobagyi GN, Stemmer SM, Burris HA, et al. Updated results from MONALEESA-2, a phase III trial of first-line ribociclib plus letrozole versus placebo plus letrozole in hormone receptor-positive, HER2-negative advanced breast cancer. *Annals of Oncology*. 2018;29(7):1541-1547. doi:10.1093/annonc/mdy155
296. Hortobagyi GN, Stemmer SM, Burris HA, et al. Overall Survival with Ribociclib plus Letrozole in Advanced Breast Cancer. *N Engl J Med*. 2022;386(10):942-950. doi:10.1056/NEJMoa2114663
297. Bardia A, Mayer IA, Vahdat LT, et al. Sacituzumab Govitecan-hziy in Refractory Metastatic Triple-Negative Breast Cancer. *N Engl J Med*. 2019;380(8):741-751. doi:10.1056/NEJMoa1814213
298. Chapman PB, Hauschild A, Robert C, et al. Improved Survival with Vemurafenib in Melanoma with BRAF V600E Mutation. *N Engl J Med*. 2011;364(26):2507-2516. doi:10.1056/NEJMoa1103782

299. McArthur GA, Chapman PB, Robert C, et al. Safety and efficacy of vemurafenib in BRAFV600E and BRAFV600K mutation-positive melanoma (BRIM-3): extended follow-up of a phase 3, randomised, open-label study. *The Lancet Oncology*. 2014;15(3):323-332. doi:10.1016/S1470-2045(14)70012-9
300. Lear JT, Migden MR, Lewis KD, et al. Long-term efficacy and safety of sonidegib in patients with locally advanced and metastatic basal cell carcinoma: 30-month analysis of the randomized phase 2 BOLT study. *Acad Dermatol Venereol*. 2018;32(3):372-381. doi:10.1111/jdv.14542
301. Chawla S, Henshaw R, Seeger L, et al. Safety and efficacy of denosumab for adults and skeletally mature adolescents with giant cell tumour of bone: interim analysis of an open-label, parallel-group, phase 2 study. *The Lancet Oncology*. 2013;14(9):901-908. doi:10.1016/S1470-2045(13)70277-8
302. Stopeck AT, Lipton A, Body JJ, et al. Denosumab Compared With Zoledronic Acid for the Treatment of Bone Metastases in Patients With Advanced Breast Cancer: A Randomized, Double-Blind Study. *JCO*. 2010;28(35):5132-5139. doi:10.1200/JCO.2010.29.7101
303. Raje N, Terpos E, Willenbacher W, et al. Denosumab versus zoledronic acid in bone disease treatment of newly diagnosed multiple myeloma: an international, double-blind, double-dummy, randomised, controlled, phase 3 study. *The Lancet Oncology*. 2018;19(3):370-381. doi:10.1016/S1470-2045(18)30072-X
304. Schultheis B, Reuter D, Ebert MP, et al. Gemcitabine combined with the monoclonal antibody nimotuzumab is an active first-line regimen in KRAS wildtype patients with locally advanced or metastatic pancreatic cancer: a multicenter, randomized phase IIb study. *Annals of Oncology*. 2017;28(10):2429-2435. doi:10.1093/annonc/mdx343
305. Patil VM, Noronha V, Joshi A, et al. A randomized phase 3 trial comparing nimotuzumab plus cisplatin chemoradiotherapy versus cisplatin chemoradiotherapy alone in locally advanced head and neck cancer. *Cancer*. 2019;125(18):3184-3197. doi:10.1002/cncr.32179
306. Mirza MR, Monk BJ, Herrstedt J, et al. Niraparib Maintenance Therapy in Platinum-Sensitive, Recurrent Ovarian Cancer. *N Engl J Med*. 2016;375(22):2154-2164. doi:10.1056/NEJMoa1611310
307. González-Martín A, Pothuri B, Vergote I, et al. Niraparib in Patients with Newly Diagnosed Advanced Ovarian Cancer. *N Engl J Med*. 2019;381(25):2391-2402. doi:10.1056/NEJMoa1910962
308. Li N, Bu H, Liu J, et al. Efficacy and safety of oral poly (ADP-ribose) polymerase inhibitor fluzoparib in patients with BRCA1/2 mutations and recurrent ovarian cancer. *Gynecologic Oncology*. 2020;159:159. doi:10.1016/j.ygyno.2020.05.229
309. Li N, Zhang Y, Wang J, et al. Fuzoloparib Maintenance Therapy in Patients With Platinum-Sensitive, Recurrent Ovarian Carcinoma (FZOCUS-2): A Multicenter, Randomized, Double-Blind, Placebo-Controlled, Phase III Trial. *JCO*. 2022;40(22):2436-2446. doi:10.1200/JCO.21.01511
310. Wu X, Zhu J, Wang J, et al. Pamiparib Monotherapy for Patients with Germline BRCA1/2 -Mutated Ovarian Cancer Previously Treated with at Least Two Lines of Chemotherapy: A Multicenter, Open-Label, Phase II Study. *Clinical Cancer Research*. 2022;28(4):653-661. doi:10.1158/1078-0432.CCR-21-1186
311. Shen L, Zhang Y, Li Z, et al. First-line cadonilimab plus chemotherapy in HER2-negative advanced gastric or gastroesophageal junction adenocarcinoma: a randomized, double-blind, phase 3 trial. *Nat Med*. Published online January 22, 2025. doi:10.1038/s41591-024-03450-4

**Table S3. Information on 265 Indications and Pivotal Clinical Trials of Novel Multi-indication Anti-cancer Drugs Approved by the National Medical Products Administration as of November 30, 2024**

| No. | Generic name | Delivery route | Product type   | Mechanism of action | Origin country | Exclusive production | Indication                                                                                                                                                                                  | Classification of Indications | Cancer type | Biomarker | Treatment type | Reimbursed | Year of indication approval | Approval type     | Clinical trial | Phase of treatment       | Line          | Clinical trial phase | Allocation    | Masking      | Arms   | Primary Outcome |
|-----|--------------|----------------|----------------|---------------------|----------------|----------------------|---------------------------------------------------------------------------------------------------------------------------------------------------------------------------------------------|-------------------------------|-------------|-----------|----------------|------------|-----------------------------|-------------------|----------------|--------------------------|---------------|----------------------|---------------|--------------|--------|-----------------|
| 1   | Erlotinib    | Po             | small molecule | Targeted agents     | Import         | No                   | Single-agent therapy is suitable for locally advanced or metastatic NSCLC that has progressed after at least one prior chemotherapy regimen                                                 | NSCLC                         | Solid       | No        | Combination    | Yes        | 2006                        | not available     | not available  | Advanced-stage Treatment | 2-Line&3-Line | Phase III            | Randomized    | Double-blind | 2 arms | OS              |
| 2   | Erlotinib    | Po             | small molecule | Targeted agents     | Import         | No                   | Single-agent therapy can be used for maintenance treatment in patients with locally advanced or metastatic NSCLC who are stable after four cycles of first-line platinum-based chemotherapy | NSCLC                         | Solid       | No        | Combination    | Yes        | 2006                        | not available     | NCT00556712    | Advanced-stage Treatment | /             | Phase III            | Randomized    | Double-blind | 2 arms | PFS             |
| 3   | Erlotinib    | Po             | small molecule | Targeted agents     | Import         | No                   | First-line treatment for patients with locally advanced or metastatic NSCLC with sensitive mutations in the EGFR gene                                                                       | NSCLC                         | Solid       | Yes       | Combination    | Yes        | 2017                        | Standard approval | NCT01342965    | Advanced-stage Treatment | 1-Line        | Phase III            | Randomized    | None         | 2 arms | PFS             |
| 4   | Icotinib     | Po             | small molecule | Targeted agents     | Domestic       | Yes                  | First-line treatment for advanced or metastatic NSCLC with sensitive EGFR mutations, or for those previously treated with platinum-based chemotherapy                                       | NSCLC                         | Solid       | Yes       | Combination    | Yes        | 2011                        | Special approval  | NCT01040780    | Advanced-stage Treatment | 1-Line        | Phase III            | Randomized    | Double-blind | 2 arms | PFS             |
| 5   | Icotinib     | Po             | small molecule | Targeted agents     | Domestic       | Yes                  | Single-agent therapy is suitable for adjuvant treatment of stage II-III NSCLC with sensitive EGFR mutations                                                                                 | NSCLC                         | Solid       | Yes       | Combination    | Yes        | 2021                        | Priority approval | NCT02448797    | Adjuvant Therapy         | /             | Phase III            | Randomized    | None         | 2 arms | DFS             |
| 6   | Afatinib     | Po             | small molecule | Targeted agents     | Import         | No                   | Advanced NSCLC with sensitive EGFR mutations, untreated with EGFR TKIs                                                                                                                      | NSCLC                         | Solid       | Yes       | Combination    | Yes        | 2017                        | Special approval  | NCT01121393    | Advanced-stage Treatment | 1-Line        | Phase III            | Randomized    | None         | 2 arms | PFS             |
| 7   | Afatinib     | Po             | small molecule | Targeted agents     | Import         | No                   | Advanced squamous NSCLC progressing during/after platinum chemotherapy                                                                                                                      | NSCLC                         | Solid       | No        | Combination    | Yes        | 2017                        | Special approval  | NCT01523587    | Advanced-stage Treatment | 2-Line        | Phase III            | Randomized    | None         | 2 arms | PFS             |
| 8   | Osimertinib  | Po             | small molecule | Targeted agents     | Import         | No                   | Indicated for adults with advanced NSCLC harboring EGFR T790M mutation, progressing after EGFR TKI treatment                                                                                | NSCLC                         | Solid       | Yes       | Combination    | Yes        | 2017                        | Special approval  | NCT02442349    | Advanced-stage Treatment | 2-Line        | Phase II             | Nonrandomized | None         | 1 arm  | ORR             |
| 9   | Osimertinib  | Po             | small molecule | Targeted agents     | Import         | No                   | First-line treatment for adults with advanced NSCLC harboring EGFR exon 19 deletion or exon 21 (L858R) mutation                                                                             | NSCLC                         | Solid       | Yes       | Combination    | Yes        | 2019                        | Priority approval | NCT02296125    | Advanced-stage Treatment | 1-Line        | Phase III            | Randomized    | Double-blind | 2 arms | PFS             |
| 10  | Osimertinib  | Po             | small molecule | Targeted agents     | Import         | No                   | Treatment for NSCLC with EGFR exon 19 deletions or exon 21 (L858R) mutations post-surgery, with or without adjuvant chemotherapy                                                            | NSCLC                         | Solid       | Yes       | Combination    | Yes        | 2021                        | Priority approval | NCT02511106    | Adjuvant Therapy         | /             | Phase III            | Randomized    | Double-blind | 2 arms | DFS             |

| No. | Generic name  | Delivery route | Product type        | Mechanism of action | Origin country | Exclusive production | Indication                                                                                                                                                                                            | Classification of Indications | Cancer type | Biomarker | Treatment type | Reimbursed | Year of indication approval | Approval type         | Clinical trial | Phase of treatment       | Line   | Clinical trial phase | Allocation    | Masking      | Arms    | Primary Outcome |
|-----|---------------|----------------|---------------------|---------------------|----------------|----------------------|-------------------------------------------------------------------------------------------------------------------------------------------------------------------------------------------------------|-------------------------------|-------------|-----------|----------------|------------|-----------------------------|-----------------------|----------------|--------------------------|--------|----------------------|---------------|--------------|---------|-----------------|
| 11  | Almonertinib  | Po             | small molecule      | Targeted agents     | Domestic       | Yes                  | Treatment for advanced NSCLC with EGFR T790M mutation, progressing after EGFR-TKI therapy                                                                                                             | NSCLC                         | Solid       | Yes       | Combination    | Yes        | 2020                        | Special approval      | NCT02981108    | Advanced-stage Treatment | 2-Line | Phase II             | Nonrandomized | None         | 1 arm   | ORR             |
| 12  | Almonertinib  | Po             | small molecule      | Targeted agents     | Domestic       | Yes                  | First-line treatment for advanced NSCLC with EGFR exon 19 deletion or exon 21 (L858R) mutation                                                                                                        | NSCLC                         | Solid       | Yes       | Combination    | Yes        | 2021                        | Breakthrough approval | NCT03849768    | Advanced-stage Treatment | 1-Line | Phase III            | Randomized    | Double-blind | 2 arms  | PFS             |
| 13  | Furmonertinib | Po             | small molecule      | Targeted agents     | Domestic       | Yes                  | Treatment for advanced NSCLC with EGFR T790M mutation, progressing after EGFR-TKI                                                                                                                     | NSCLC                         | Solid       | Yes       | Combination    | Yes        | 2021                        | Conditional approval  | NCT03452592    | Advanced-stage Treatment | 2-Line | Phase IIb            | Nonrandomized | None         | 1 arm   | ORR             |
| 14  | Furmonertinib | Po             | small molecule      | Targeted agents     | Domestic       | Yes                  | First-line treatment for advanced NSCLC with EGFR exon 19 deletion or exon 21 L858R mutations                                                                                                         | NSCLC                         | Solid       | Yes       | Combination    | Yes        | 2022                        | Breakthrough approval | NCT03787992    | Advanced-stage Treatment | 1-Line | Phase III            | Randomized    | Double-blind | 2 arms  | PFS             |
| 15  | Crizotinib    | Po             | small molecule      | Targeted agents     | Import         | Yes                  | Treatment for ALK-positive advanced NSCLC                                                                                                                                                             | NSCLC                         | Solid       | No        | Combination    | Yes        | 2013                        | Special approval      | NCT00932893    | Advanced-stage Treatment | 1-Line | Phase III            | Randomized    | None         | 2 arms  | PFS             |
| 16  | Crizotinib    | Po             | small molecule      | Targeted agents     | Import         | Yes                  | Treatment for advanced NSCLC with ROS1 positivity                                                                                                                                                     | NSCLC                         | Solid       | Yes       | Combination    | Yes        | 2016                        | not available         | NCT01945021    | Advanced-stage Treatment | 1-Line | Phase II             | Nonrandomized | None         | 1 arm   | ORR             |
| 17  | Ceritinib     | Po             | small molecule      | Targeted agents     | Import         | No                   | For ALK-positive advanced NSCLC patients progressing or intolerant to crizotinib                                                                                                                      | NSCLC                         | Solid       | Yes       | Combination    | No         | 2018                        | Priority approval     | NCT01828112    | Advanced-stage Treatment | 2-Line | Phase III            | Randomized    | None         | 2 arms  | PFS             |
| 18  | Ceritinib     | Po             | small molecule      | Targeted agents     | Import         | No                   | Monotherapy for ALK-positive advanced or metastatic NSCLC                                                                                                                                             | NSCLC                         | Solid       | Yes       | Combination    | Yes        | 2020                        | Standard approval     | NCT01828099    | Advanced-stage Treatment | 1-Line | Phase III            | Randomized    | None         | 2 arms  | PFS             |
| 19  | Ensartinib    | Po             | small molecule      | Targeted agents     | Domestic       | Yes                  | For ALK-positive advanced NSCLC patients progressing or intolerant to crizotinib                                                                                                                      | NSCLC                         | Solid       | Yes       | Combination    | No         | 2020                        | Priority approval     | NCT03215693    | Advanced-stage Treatment | 2-Line | Phase II             | Nonrandomized | None         | 1 arm   | ORR             |
| 20  | Ensartinib    | Po             | small molecule      | Targeted agents     | Domestic       | Yes                  | Monotherapy for ALK-positive advanced or metastatic NSCLC                                                                                                                                             | NSCLC                         | Solid       | Yes       | Combination    | Yes        | 2022                        | Priority approval     | NCT02767804    | Advanced-stage Treatment | 1-Line | Phase III            | Randomized    | None         | 2 arms  | PFS             |
| 21  | Lorlatinib    | Po             | small molecule      | Targeted agents     | Import         | Yes                  | For ALK-positive advanced NSCLC previously treated with ALK TKIs                                                                                                                                      | NSCLC                         | Solid       | Yes       | Combination    | No         | 2022                        | Conditional approval  | NCT03909971    | Advanced-stage Treatment | 2-Line | Phase IIa            | Nonrandomized | None         | ≥3 arms | ORR             |
| 22  | Lorlatinib    | Po             | small molecule      | Targeted agents     | Import         | Yes                  | Monotherapy for ALK-positive advanced or metastatic NSCLC                                                                                                                                             | NSCLC                         | Solid       | Yes       | Combination    | Yes        | 2022                        | Standard approval     | NCT03052608    | Advanced-stage Treatment | 1-Line | Phase III            | Randomized    | None         | 2 arms  | PFS             |
| 23  | Iruplinalkib  | Po             | small molecule      | Targeted agents     | Domestic       | Yes                  | Treatment for ALK-positive advanced NSCLC progressing or intolerant to crizotinib                                                                                                                     | NSCLC                         | Solid       | Yes       | Combination    | No         | 2023                        | Standard approval     | NCT04641754    | Advanced-stage Treatment | 2-Line | Phase II             | Nonrandomized | None         | 1 arm   | PFS             |
| 24  | Iruplinalkib  | Po             | small molecule      | Targeted agents     | Domestic       | Yes                  | Monotherapy is suitable for the treatment of ALK-positive advanced or metastatic NSCLC                                                                                                                | NSCLC                         | Solid       | Yes       | Combination    | Yes        | 2024                        | Standard approval     | NCT04632758    | Advanced-stage Treatment | 1-Line | Phase III            | Randomized    | None         | 2 arms  | PFS             |
| 25  | Bevacizumab   | Iv             | monoclonal antibody | Targeted agents     | Import         | No                   | Bevacizumab with fluoropyrimidine-based chemotherapy is suitable for metastatic colorectal cancer                                                                                                     | CRC                           | Solid       | No        | Combination    | Yes        | 2010                        | not available         | NCT00069095    | Advanced-stage Treatment | 1-Line | Phase III            | Randomized    | Double-blind | ≥3 arms | PFS             |
| 26  | Bevacizumab   | Iv             | monoclonal antibody | Targeted agents     | Import         | No                   | Bevacizumab with platinum-based chemotherapy for first-line treatment of advanced, metastatic, or recurrent non-squamous NSCLC                                                                        | NSCLC                         | Solid       | No        | Combination    | Yes        | 2015                        | not available         | NCT00021060    | Advanced-stage Treatment | 1-Line | Phase III            | Randomized    | None         | 2 arms  | OS              |
| 27  | Bevacizumab   | Iv             | monoclonal antibody | Targeted agents     | Import         | No                   | Treatment for adult patients with recurrent glioblastoma                                                                                                                                              | Glioma                        | Solid       | No        | Combination    | Yes        | 2020                        | Standard approval     | NCT01290939    | Advanced-stage Treatment | 2-Line | Phase III            | Randomized    | None         | 2 arms  | OS              |
| 28  | Bevacizumab   | Iv             | monoclonal antibody | Targeted agents     | Import         | No                   | Combination atezolizumab treatment for patients with previously untreated, unresectable hepatocellular carcinoma                                                                                      | HCC                           | Solid       | No        | Combination    | Yes        | 2021                        | Priority approval     | NCT03434379    | Advanced-stage Treatment | 1-Line | Phase III            | Randomized    | None         | 2 arms  | OS              |
| 29  | Bevacizumab   | Iv             | monoclonal antibody | Targeted agents     | Import         | No                   | Bevacizumab combined with carboplatin and paclitaxel for first-line treatment of stage III or IV epithelial ovarian cancer, fallopian tube cancer, or primary peritoneal cancer after initial surgery | OC&TC&PC                      | Solid       | No        | Combination    | Yes        | 2021                        | Standard approval     | NCT00262847    | Advanced-stage Treatment | 1-Line | Phase III            | Randomized    | Double-blind | ≥3 arms | PFS             |
| 30  | Bevacizumab   | Iv             | monoclonal antibody | Targeted agents     | Import         | No                   | Bevacizumab combined with paclitaxel and cisplatin or paclitaxel and topotecan for the treatment of patients with persistent, recurrent, or metastatic cervical cancer.                               | CC                            | Solid       | No        | Combination    | Yes        | 2021                        | Standard approval     | NCT00803062    | Advanced-stage Treatment | 1-Line | Phase III            | Randomized    | None         | ≥3 arms | OS              |

| No. | Generic name  | Delivery route | Product type   | Mechanism of action | Origin country | Exclusive production | Indication                                                                                                                                                                                                 | Classification of Indications | Cancer type | Biomarker | Treatment type | Reimbursed | Year of indication approval | Approval type        | Clinical trial | Phase of treatment       | Line            | Clinical trial phase | Allocation    | Masking      | Arms   | Primary Outcome |
|-----|---------------|----------------|----------------|---------------------|----------------|----------------------|------------------------------------------------------------------------------------------------------------------------------------------------------------------------------------------------------------|-------------------------------|-------------|-----------|----------------|------------|-----------------------------|----------------------|----------------|--------------------------|-----------------|----------------------|---------------|--------------|--------|-----------------|
| 31  | Anlotinib     | Po             | small molecule | Targeted agents     | Domestic       | Yes                  | The drug is suitable for advanced NSCLC patients progressing after at least two prior chemotherapies. For EGFR mutations or ALK positivity, targeted therapy should have been used before                  | NSCLC                         | Solid       | Yes       | Combination    | Yes        | 2018                        | Special approval     | NCT02388919    | Advanced-stage Treatment | ≥3-Line         | Phase III            | Randomized    | Double-blind | 2 arms | OS              |
| 32  | Anlotinib     | Po             | small molecule | Targeted agents     | Domestic       | Yes                  | For advanced soft tissue sarcomas (alveolar soft part sarcoma, clear cell sarcoma) progressing or relapsing after one anthracycline-containing chemotherapy                                                | BSTT                          | Solid       | No        | Combination    | Yes        | 2019                        | Special approval     | NCT02449343    | Advanced-stage Treatment | 2-Line          | Phase III            | Randomized    | Double-blind | 2 arms | pFS             |
| 33  | Anlotinib     | Po             | small molecule | Targeted agents     | Domestic       | Yes                  | Single-agent therapy for small cell lung cancer progressing or relapsing after two prior chemotherapies                                                                                                    | SCLC                          | Solid       | No        | Combination    | Yes        | 2019                        | Special approval     | NCT03059797    | Advanced-stage Treatment | ≥3-Line         | Phase II             | Randomized    | Double-blind | 2 arms | PFS             |
| 34  | Anlotinib     | Po             | small molecule | Targeted agents     | Domestic       | Yes                  | For the treatment of patients with symptomatic or progressive, unresectable locally advanced or metastatic medullary thyroid carcinoma                                                                     | TC                            | Solid       | No        | Combination    | Yes        | 2021                        | Priority approval    | NCT02586350    | Advanced-stage Treatment | 1-Line          | Phase II             | Randomized    | Double-blind | 2 arms | PFS             |
| 35  | Anlotinib     | Po             | small molecule | Targeted agents     | Domestic       | Yes                  | For patients with progressive, locally advanced, or metastatic radioiodine-refractory differentiated thyroid cancer                                                                                        | TC                            | Solid       | No        | Combination    | Yes        | 2022                        | Standard approval    | NCT02586337    | Advanced-stage Treatment | 1-Line          | Phase II             | Randomized    | Double-blind | 2 arms | PFS             |
| 36  | Everolimus    | Po             | small molecule | Targeted agents     | Import         | No                   | Advanced renal cell carcinoma that has failed prior treatment with sunitinib or sorafenib, with data primarily based on clear cell renal carcinoma                                                         | RCC                           | Solid       | No        | Combination    | Yes        | 2013                        | Special approval     | NCT00410124    | Advanced-stage Treatment | 2-Line          | Phase III            | Randomized    | Double-blind | 2 arms | PFS             |
| 37  | Everolimus    | Po             | small molecule | Targeted agents     | Import         | No                   | Adult patients with unresectable, locally advanced or metastatic, well-differentiated (moderately or well-differentiated) advanced pancreatic neuroendocrine tumors                                        | NET                           | Solid       | No        | Combination    | Yes        | 2014                        | not available        | NCT00510068    | Advanced-stage Treatment | 2-Line          | Phase III            | Randomized    | Double-blind | 2 arms | PFS             |
| 38  | Everolimus    | Po             | small molecule | Targeted agents     | Import         | No                   | Adult and pediatric patients with tuberous sclerosis complex-associated subependymal giant cell astrocytoma requiring therapeutic intervention but not amenable to surgical resection                      | TSC                           | Solid       | No        | Combination    | Yes        | 2014                        | not available        | NCT00789828    | Advanced-stage Treatment | 1-Line          | Phase III            | Randomized    | Double-blind | 2 arms | RR              |
| 39  | Everolimus    | Po             | small molecule | Targeted agents     | Import         | No                   | For the treatment of adult patients with tuberous sclerosis complex-associated renal angiomyolipomas that do not require immediate surgical intervention                                                   | TSC                           | Solid       | No        | Combination    | Yes        | 2016                        | not available        | NCT00790400    | Advanced-stage Treatment | 1-Line          | Phase III            | Randomized    | Double-blind | 2 arms | ORR             |
| 40  | Everolimus    | Po             | small molecule | Targeted agents     | Import         | No                   | Adult patients with locally advanced or metastatic, well-differentiated, progressive, non-functional gastroenteropancreatic or lung neuroendocrine tumors (NETs) that cannot be surgically resected        | NET                           | Solid       | No        | Combination    | Yes        | 2018                        | not available        | NCT01524783    | Advanced-stage Treatment | 2-Line          | Phase III            | Randomized    | Double-blind | 2 arms | PFS             |
| 41  | Everolimus    | Po             | small molecule | Targeted agents     | Import         | No                   | Everolimus with exemestane for postmenopausal women with HR-positive, HER2-negative advanced breast cancer after letrozole or anastrozole failure                                                          | BC                            | Solid       | Yes       | Combination    | Yes        | 2022                        | Standard approval    | NCT00863655    | Advanced-stage Treatment | 2-Line          | Phase III            | Randomized    | Double-blind | 2 arms | PFS             |
| 42  | Pralsetinib   | Po             | small molecule | Targeted agents     | Import         | Yes                  | Treatment for adult patients with locally advanced or metastatic NSCLC with RET gene fusion positive                                                                                                       | NSCLC                         | Solid       | Yes       | Combination    | No         | 2021                        | Conditional approval | NCT03037385    | Advanced-stage Treatment | 1-Line          | Phase/II             | Nonrandomized | None         | 1 arm  | ORR             |
| 43  | Pralsetinib   | Po             | small molecule | Targeted agents     | Import         | Yes                  | For adults and pediatric patients ≥12 years with advanced/metastatic RET-mutant MTC or RET fusion-positive thyroid cancer, requiring systemic therapy and refractory to radioactive iodine (if applicable) | TC                            | Solid       | Yes       | Combination    | No         | 2022                        | Conditional approval | NCT03037385    | Advanced-stage Treatment | 2-Line & 3-Line | Phase/II             | Nonrandomized | None         | 1 arm  | ORR             |
| 44  | Selpercatinib | Po             | small molecule | Targeted agents     | Import         | Yes                  | For the treatment of adult patients with locally advanced or metastatic RET-positive NSCLC                                                                                                                 | NSCLC                         | Solid       | Yes       | Combination    | No         | 2022                        | Conditional approval | NCT03157128    | Advanced-stage Treatment | 1-Line          | Phase/II             | Nonrandomized | None         | 1 arm  | ORR             |
| 45  | Selpercatinib | Po             | small molecule | Targeted agents     | Import         | Yes                  | For adults and pediatric patients ≥12 years with advanced/metastatic RET-mutant MTC or RET fusion-positive thyroid cancer, requiring systemic therapy and refractory to radioactive iodine (if applicable) | TC                            | Solid       | Yes       | Combination    | No         | 2022                        | Conditional approval | NCT03157128    | Advanced-stage Treatment | 2-Line & 3-Line | Phase/II             | Nonrandomized | None         | 1 arm  | ORR             |
| 46  | Dabrafenib    | Po             | small molecule | Targeted agents     | Import         | Yes                  | Dabrafenib combined with trametinib is used to treat patients with unresectable or metastatic melanoma with BRAF V600E/K mutations                                                                         | MEL                           | Solid       | Yes       | Combination    | Yes        | 2019                        | Priority approval    | NCT01584648    | Advanced-stage Treatment | 1-Line          | Phase III            | Randomized    | Double-blind | 2 arms | PFS             |
| 47  | Dabrafenib    | Po             | small molecule | Targeted agents     | Import         | Yes                  | Dabrafenib combined with trametinib is suitable for adjuvant treatment in patients with stage III melanoma with BRAF V600E/K mutations after complete resection                                            | MEL                           | Solid       | Yes       | Combination    | Yes        | 2020/3/6                    | Priority approval    | NCT01682083    | Adjuvant Therapy         | /               | Phase III            | Randomized    | Double-blind | 2 arms | RFS             |
| 48  | Dabrafenib    | Po             | small molecule | Targeted agents     | Import         | Yes                  | Dabrafenib combined with trametinib is used to treat patients with metastatic NSCLC with BRAF V600 mutations                                                                                               | NSCLC                         | Solid       | Yes       | Combination    | Yes        | 2022                        | Conditional approval | NCT01336634    | Advanced-stage Treatment | 1-Line          | Phase II             | Nonrandomized | None         | 1 arm  | ORR             |
| 49  | Trametinib    | Po             | small molecule | Targeted agents     | Import         | Yes                  | Trametinib combined with dabrafenib is used to treat patients with unresectable or metastatic melanoma with BRAF V600E/K mutations                                                                         | MEL                           | Solid       | Yes       | Combination    | Yes        | 2019                        | Priority approval    | NCT01584648    | Advanced-stage Treatment | 1-Line          | Phase III            | Randomized    | Double-blind | 2 arms | PFS             |
| 50  | Trametinib    | Po             | small molecule | Targeted agents     | Import         | Yes                  | Trametinib combined with dabrafenib is suitable for adjuvant treatment in patients with completely resected stage III melanoma with BRAF V600E/K mutations                                                 | MEL                           | Solid       | Yes       | Combination    | Yes        | 2020                        | Priority approval    | NCT01682083    | Adjuvant Therapy         | /               | Phase III            | Randomized    | Double-blind | 2 arms | RFS             |

| No. | Generic name  | Delivery route | Product type        | Mechanism of action | Origin country | Exclusive production | Indication                                                                                                                                                                                                                                                                                                                                        | Classification of Indications | Cancer type | Biomarker | Treatment type | Reimbursed | Year of indication approval | Approval type        | Clinical trial            | Phase of treatment       | Line            | Clinical trial phase | Allocation    | Masking      | Arms    | Primary Outcome |
|-----|---------------|----------------|---------------------|---------------------|----------------|----------------------|---------------------------------------------------------------------------------------------------------------------------------------------------------------------------------------------------------------------------------------------------------------------------------------------------------------------------------------------------|-------------------------------|-------------|-----------|----------------|------------|-----------------------------|----------------------|---------------------------|--------------------------|-----------------|----------------------|---------------|--------------|---------|-----------------|
| 51  | Trametinib    | Po             | small molecule      | Targeted agents     | Import         | Yes                  | Trametinib combined with dabrafenib is used to treat patients with metastatic NSCLC with BRAF V600 mutations                                                                                                                                                                                                                                      | NSCLC                         | Solid       | Yes       | Combination    | Yes        | 2022                        | Conditional approval | NCT01336634               | Advanced-stage Treatment | 1-Line          | Phase II             | Nonrandomized | None         | 1 arm   | ORR             |
| 52  | Entrectinib   | Po             | small molecule      | Targeted agents     | Import         | Yes                  | Indicated for adults and pediatric patients ≥12 years with solid tumors meeting the following criteria: Diagnosed with NTRK gene fusions (excluding acquired resistance mutations); Locally advanced, metastatic, or surgically resectable with severe complications; No satisfactory alternative treatments or failure of prior therapies.       | NTRK                          | Solid       | Yes       | Combination    | Yes        | 2022                        | Conditional approval | NCT02097810 & NCT02568267 | Advanced-stage Treatment | 2-Line & 3-Line | Phase I & II         | Nonrandomized | None         | 1 arm   | ORR             |
| 53  | Entrectinib   | Po             | small molecule      | Targeted agents     | Import         | Yes                  | Indicated for adult patients with locally advanced or metastatic ROS1-positive NSCLC                                                                                                                                                                                                                                                              | NSCLC                         | Solid       | Yes       | Combination    | Yes        | 2022                        | Standard approval    | NCT02097810 & NCT02568267 | Advanced-stage Treatment | 1-Line          | Phase I & II         | Nonrandomized | None         | 1 arm   | ORR             |
| 54  | Entrectinib   | Po             | small molecule      | Targeted agents     | Import         | Yes                  | Indicated for adults and pediatric patients ≥1 month of age with solid tumors meeting the following criteria: Diagnosed with NTRK gene fusions (excluding acquired resistance mutations); Locally advanced, metastatic, or surgically resectable with severe complications; No satisfactory alternative treatments or failure of prior therapies. | NTRK                          | Solid       | Yes       | Combination    | No         | 2024                        | Conditional approval | NCT02650401 & NCT04589845 | Advanced-stage Treatment | 2-Line & 3-Line | Phase I/II & II      | Nonrandomized | None         | 1 arm   | ORR             |
| 55  | Nivolumab     | Iv             | monoclonal antibody | Immune regulators   | Import         | Yes                  | Indicated as monotherapy for the treatment of adult patients with locally advanced or metastatic NSCLC that is EGFR mutation-negative and ALK-negative, who have experienced disease progression or intolerance after prior platinum-based chemotherapy                                                                                           | NSCLC                         | Solid       | Yes       | Combination    | No         | 2018                        | Special approval     | NCT02613507               | Advanced-stage Treatment | 2-Line          | Phase III            | Randomized    | None         | 2 arms  | OS              |
| 56  | Nivolumab     | Iv             | monoclonal antibody | Immune regulators   | Import         | Yes                  | Indicated as monotherapy for recurrent or metastatic SCCHN patients with PD-L1-expressing tumors (≥1%) and disease progression on or after platinum-based therapy                                                                                                                                                                                 | SCCHN                         | Solid       | Yes       | Combination    | No         | 2019                        | Priority approval    | NCT02105636               | Advanced-stage Treatment | 2-Line          | Phase III            | Randomized    | None         | 2 arms  | OS              |
| 57  | Nivolumab     | Iv             | monoclonal antibody | Immune regulators   | Import         | Yes                  | Patients with advanced or recurrent gastric or gastroesophageal junction adenocarcinoma who have received two or more prior systemic treatment regimens                                                                                                                                                                                           | GC                            | Solid       | No        | Combination    | No         | 2020                        | Priority approval    | NCT02267343               | Advanced-stage Treatment | ≥3-Line         | Phase III            | Randomized    | Double-blind | 2 arms  | OS              |
| 58  | Nivolumab     | Iv             | monoclonal antibody | Immune regulators   | Import         | Yes                  | Nivolumab combined with ipilimumab for adult patients with unresectable, previously untreated non-epithelioid malignant pleural mesothelioma                                                                                                                                                                                                      | MPM                           | Solid       | No        | Combination    | No         | 2021                        | Conditional approval | NCT02899299               | Advanced-stage Treatment | 1-Line          | Phase III            | Randomized    | None         | ≥3 arms | OS              |
| 59  | Nivolumab     | Iv             | monoclonal antibody | Immune regulators   | Import         | Yes                  | Nivolumab with fluoropyrimidine and platinum chemotherapy is for first-line treatment of advanced or metastatic gastric, gastroesophageal junction, or esophageal adenocarcinoma                                                                                                                                                                  | GC                            | Solid       | No        | Combination    | No         | 2021                        | Standard approval    | NCT02872116               | Advanced-stage Treatment | 1-Line          | Phase III            | Randomized    | None         | ≥3 arms | OS              |
| 60  | Nivolumab     | Iv             | monoclonal antibody | Immune regulators   | Import         | Yes                  | Nivolumab combined with fluoropyrimidine and platinum-based chemotherapy is suitable for first-line treatment of patients with advanced or metastatic esophageal squamous cell carcinoma                                                                                                                                                          | EC                            | Solid       | No        | Combination    | No         | 2022                        | Standard approval    | NCT03143153               | Advanced-stage Treatment | 1-Line          | Phase III            | Randomized    | None         | ≥3 arms | OS              |
| 61  | Nivolumab     | Iv             | monoclonal antibody | Immune regulators   | Import         | Yes                  | Adjuvant treatment for patients with esophageal or gastroesophageal junction cancer who have residual pathology after neoadjuvant chemoradiotherapy and complete surgical resection                                                                                                                                                               | EC                            | Solid       | No        | Combination    | No         | 2022                        | Standard approval    | NCT02743494               | Adjuvant Therapy         | /               | Phase III            | Randomized    | Double-blind | 2 arms  | DFS             |
| 62  | Nivolumab     | Iv             | monoclonal antibody | Immune regulators   | Import         | Yes                  | Nivolumab with platinum-based chemotherapy is for neoadjuvant treatment of resectable NSCLC (tumor ≥4 cm or lymph node positive) in adults                                                                                                                                                                                                        | NSCLC                         | Solid       | No        | Combination    | No         | 2023                        | Standard approval    | NCT02998528               | Neoadjuvant Therapy      | /               | Phase III            | Randomized    | None         | 2 arms  | pCR & EFS       |
| 63  | Nivolumab     | Iv             | monoclonal antibody | Immune regulators   | Import         | Yes                  | For adjuvant treatment of patients with urothelial carcinoma at high risk of recurrence after radical cystectomy                                                                                                                                                                                                                                  | UC                            | Solid       | No        | Combination    | No         | 2023                        | Standard approval    | NCT02632409               | Adjuvant Therapy         | /               | Phase III            | Randomized    | Double-blind | 2 arms  | DFS             |
| 64  | Nivolumab     | Iv             | monoclonal antibody | Immune regulators   | Import         | Yes                  | For first-line treatment of patients with unresectable or metastatic microsatellite instability-high (MSI-H) or mismatch repair deficient (dMMR) colorectal cancer (CRC)                                                                                                                                                                          | CRC                           | Solid       | Yes       | Combination    | No         | 2024                        | Priority approval    | NCT04008030               | Advanced-stage Treatment | 1-Line          | Phase III            | Randomized    | None         | 2 arms  | PFS             |
| 65  | Nivolumab     | Iv             | monoclonal antibody | Immune regulators   | Import         | Yes                  | Nivolumab combined with cisplatin and gemcitabine for first-line treatment in adult patients with unresectable or metastatic urothelial carcinoma                                                                                                                                                                                                 | UC                            | Solid       | No        | Combination    | No         | 2024                        | Standard approval    | NCT03036098               | Advanced-stage Treatment | 1-Line          | Phase III            | Randomized    | None         | 2 arms  | OS              |
| 66  | Pembrolizumab | Iv             | monoclonal antibody | Immune regulators   | Import         | Yes                  | For the treatment of unresectable or metastatic melanoma after failure of first-line therapy                                                                                                                                                                                                                                                      | MEL                           | Solid       | No        | Combination    | No         | 2018                        | Priority approval    | NCT02821000               | Advanced-stage Treatment | 2-Line          | Phase Ib             | Nonrandomized | None         | 1 arm   | ORR             |
| 67  | Pembrolizumab | Iv             | monoclonal antibody | Immune regulators   | Import         | Yes                  | Pembrolizumab with pemetrexed and platinum chemotherapy is for first-line treatment of metastatic non-squamous NSCLC with EGFR and ALK-negative mutations                                                                                                                                                                                         | NSCLC                         | Solid       | Yes       | Combination    | No         | 2019                        | Priority approval    | NCT02578680               | Advanced-stage Treatment | 1-Line          | Phase III            | Randomized    | Double-blind | 2 arms  | OS              |
| 68  | Pembrolizumab | Iv             | monoclonal antibody | Immune regulators   | Import         | Yes                  | Pembrolizumab is indicated as first-line monotherapy for EGFR-negative, ALK-negative, locally advanced or metastatic NSCLC with PD-L1 ≥1%, as approved by the National Medical Products Administration                                                                                                                                            | NSCLC                         | Solid       | Yes       | Combination    | No         | 2019                        | Priority approval    | NCT02220894               | Advanced-stage Treatment | 1-Line          | Phase III            | Randomized    | None         | 2 arms  | OS              |
| 69  | Pembrolizumab | Iv             | monoclonal antibody | Immune regulators   | Import         | Yes                  | Pembrolizumab combined with carboplatin and paclitaxel is suitable for first-line treatment of patients with metastatic squamous NSCLC                                                                                                                                                                                                            | NSCLC                         | Solid       | No        | Combination    | No         | 2019                        | Priority approval    | NCT02775435               | Advanced-stage Treatment | 1-Line          | Phase III            | Randomized    | Double-blind | 2 arms  | PFS             |

| No. | Generic name  | Delivery route | Product type        | Mechanism of action | Origin country | Exclusive production | Indication                                                                                                                                                                                                                                                                                                                         | Classification of Indications | Cancer type | Biomarker | Treatment type | Reimbursed | Year of indication approval | Approval type        | Clinical trial            | Phase of treatment       | Line            | Clinical trial phase | Allocation    | Masking      | Arms          | Primary Outcome |
|-----|---------------|----------------|---------------------|---------------------|----------------|----------------------|------------------------------------------------------------------------------------------------------------------------------------------------------------------------------------------------------------------------------------------------------------------------------------------------------------------------------------|-------------------------------|-------------|-----------|----------------|------------|-----------------------------|----------------------|---------------------------|--------------------------|-----------------|----------------------|---------------|--------------|---------------|-----------------|
| 70  | Pembrolizumab | Iv             | monoclonal antibody | Immune regulators   | Import         | Yes                  | Pembrolizumab monotherapy is for advanced or metastatic esophageal squamous cell carcinoma with PD-L1 CPS $\geq 10$ in patients who failed first-line treatment, as approved by the National Medical Products Administration                                                                                                       | EC                            | Solid       | Yes       | Combination    | No         | 2020                        | Priority approval    | NCT02564263               | Advanced-stage Treatment | 2-Line          | Phase III            | Randomized    | None         | 2 arms        | OS              |
| 71  | Pembrolizumab | Iv             | monoclonal antibody | Immune regulators   | Import         | Yes                  | Pembrolizumab monotherapy is for first-line treatment of metastatic or unresectable recurrent HNSCC with PD-L1 CPS $\geq 20$ , as assessed by a validated test                                                                                                                                                                     | SCCHN                         | Solid       | Yes       | Combination    | No         | 2020                        | Priority approval    | NCT02358031               | Advanced-stage Treatment | 1-Line          | Phase III            | Randomized    | None         | $\geq 3$ arms | OS              |
| 72  | Pembrolizumab | Iv             | monoclonal antibody | Immune regulators   | Import         | Yes                  | Pembrolizumab monotherapy is for first-line treatment of unresectable or metastatic MSI-H or dMMR CRC with wild-type KRAS, NRAS, and BRAF genes                                                                                                                                                                                    | CRC                           | Solid       | Yes       | Combination    | No         | 2021                        | Conditional approval | NCT02563002               | Advanced-stage Treatment | 1-Line          | Phase III            | Randomized    | None         | 2 arms        | OS              |
| 73  | Pembrolizumab | Iv             | monoclonal antibody | Immune regulators   | Import         | Yes                  | Pembrolizumab combined with platinum-based and fluoropyrimidine chemotherapy for first-line treatment of locally advanced unresectable or metastatic esophageal/gastroesophageal junction cancer                                                                                                                                   | EC                            | Solid       | No        | Combination    | No         | 2021                        | Standard approval    | NCT03189719               | Advanced-stage Treatment | 1-Line          | Phase III            | Randomized    | Double-blind | 2 arms        | OS              |
| 74  | Pembrolizumab | Iv             | monoclonal antibody | Immune regulators   | Import         | Yes                  | Pembrolizumab monotherapy for the treatment of patients with hepatocellular carcinoma (HCC) who have been previously treated with sorafenib or chemotherapy containing oxaliplatin                                                                                                                                                 | HCC                           | Solid       | No        | Combination    | No         | 2022                        | Standard approval    | NCT03062358               | Advanced-stage Treatment | 2-Line          | Phase III            | Randomized    | Double-blind | 2 arms        | OS              |
| 75  | Pembrolizumab | Iv             | monoclonal antibody | Immune regulators   | Import         | Yes                  | Pembrolizumab combined with chemotherapy as neoadjuvant treatment, followed by pembrolizumab monotherapy as adjuvant treatment for early high-risk PD-L1-positive (CPS $\geq 20$ ) triple-negative breast cancer (TNBC)                                                                                                            | BC                            | Solid       | Yes       | Combination    | No         | 2022                        | Standard approval    | NCT03036488               | Neoadjuvant Therapy      | /               | Phase III            | Randomized    | Double-blind | 2 arms        | pCR & EFS       |
| 76  | Pembrolizumab | Iv             | monoclonal antibody | Immune regulators   | Import         | Yes                  | Monotherapy for adult patients with advanced unresectable or metastatic solid tumors with high microsatellite instability (MSI-H) or defective mismatch repair (dMMR), including colorectal cancer progressing after fluoropyrimidines, oxaliplatin, and irinotecan, and other solid tumors with no satisfactory treatment options | MSI-H/dMMR                    | Solid       | Yes       | Combination    | No         | 2023                        | Conditional approval | NCT02460198 & NCT02628067 | Advanced-stage Treatment | 2-Line & 3-Line | Phase II             | Nonrandomized | None         | 1 arm         | ORR             |
| 77  | Pembrolizumab | Iv             | monoclonal antibody | Immune regulators   | Import         | Yes                  | Pembrolizumab with fluoropyrimidine and platinum-based chemotherapy for first-line treatment of locally advanced unresectable or metastatic HER2-negative gastric/gastroesophageal junction adenocarcinoma                                                                                                                         | GC                            | Solid       | Yes       | Combination    | No         | 2023                        | Standard approval    | NCT03675737               | Advanced-stage Treatment | 1-Line          | Phase III            | Randomized    | Double-blind | 2 arms        | OS              |
| 78  | Pembrolizumab | Iv             | monoclonal antibody | Immune regulators   | Import         | Yes                  | Pembrolizumab combined with gemcitabine and cisplatin for first-line treatment of patients with locally advanced or metastatic biliary tract cancer (BTC)                                                                                                                                                                          | BTC                           | Solid       | No        | Combination    | No         | 2024                        | Standard approval    | NCT04003636               | Advanced-stage Treatment | 1-Line          | Phase III            | Randomized    | Double-blind | 2 arms        | OS              |
| 79  | Pembrolizumab | Iv             | monoclonal antibody | Immune regulators   | Import         | Yes                  | Pembrolizumab with trastuzumab, fluoropyrimidine, and platinum-based chemotherapy for first-line treatment of HER2-positive gastric/gastroesophageal junction adenocarcinoma with PD-L1 expression (CPS $\geq 1$ )                                                                                                                 | GC                            | Solid       | Yes       | Combination    | No         | 2024                        | Standard approval    | NCT03615326               | Advanced-stage Treatment | 1-Line          | Phase III            | Randomized    | Double-blind | 2 arms        | OS              |
| 80  | Durvalumab    | Iv             | monoclonal antibody | Immune regulators   | Import         | Yes                  | Treatment for unresectable stage III NSCLC patients without progression after platinum-based chemotherapy and concurrent radiotherapy                                                                                                                                                                                              | NSCLC                         | Solid       | No        | Combination    | No         | 2019                        | Standard approval    | NCT02125461               | Adjuvant Therapy         | /               | Phase III            | Randomized    | Double-blind | 2 arms        | OS              |
| 81  | Durvalumab    | Iv             | monoclonal antibody | Immune regulators   | Import         | Yes                  | Durvalumab combined with etoposide and carboplatin or cisplatin as first-line treatment for adult patients with extensive-stage small cell lung cancer (ES-SCLC)                                                                                                                                                                   | SCLC                          | Solid       | No        | Combination    | No         | 2021                        | Standard approval    | NCT03043872               | Advanced-stage Treatment | 1-Line          | Phase III            | Randomized    | None         | $\geq 3$ arms | OS              |
| 82  | Durvalumab    | Iv             | monoclonal antibody | Immune regulators   | Import         | Yes                  | Durvalumab combined with gemcitabine and cisplatin for the first-line treatment of adult patients with locally advanced or metastatic biliary tract cancer (BTC)                                                                                                                                                                   | BTC                           | Solid       | No        | Combination    | No         | 2023                        | Standard approval    | NCT03875235               | Advanced-stage Treatment | 1-Line          | Phase III            | Randomized    | Double-blind | 2 arms        | OS              |
| 83  | Atezolizumab  | Iv             | monoclonal antibody | Immune regulators   | Import         | Yes                  | Atezolizumab combined with carboplatin and etoposide for first-line treatment of ES-SCLC patients                                                                                                                                                                                                                                  | SCLC                          | Solid       | No        | Combination    | No         | 2020                        | Standard approval    | NCT02763579               | Advanced-stage Treatment | 1-Line          | Phase III            | Randomized    | Double-blind | 2 arms        | OS              |
| 84  | Atezolizumab  | Iv             | monoclonal antibody | Immune regulators   | Import         | Yes                  | Atezolizumab combined with bevacizumab treatment for patients with previously untreated, unresectable hepatocellular carcinoma                                                                                                                                                                                                     | HCC                           | Solid       | No        | Combination    | No         | 2020                        | Priority approval    | NCT03434379               | Advanced-stage Treatment | 1-Line          | Phase III            | Randomized    | None         | 2 arms        | OS              |
| 85  | Atezolizumab  | Iv             | monoclonal antibody | Immune regulators   | Import         | Yes                  | First-line monotherapy for metastatic EGFR- and ALK-negative NSCLC, with PD-L1 positive in $\geq 50\%$ of tumor cells (TC $\geq 50\%$ ) or immune cells covering $\geq 10\%$ of the tumor (IC $\geq 10\%$ )                                                                                                                        | NSCLC                         | Solid       | Yes       | Combination    | No         | 2021                        | Conditional approval | NCT02409342               | Advanced-stage Treatment | 1-Line          | Phase III            | Randomized    | None         | 2 arms        | OS              |
| 86  | Atezolizumab  | Iv             | monoclonal antibody | Immune regulators   | Import         | Yes                  | Atezolizumab with pemetrexed and platinum-based chemotherapy for first-line treatment of metastatic EGFR- and ALK-negative non-squamous NSCLC                                                                                                                                                                                      | NSCLC                         | Solid       | Yes       | Combination    | No         | 2021                        | Standard approval    | NCT02657434               | Advanced-stage Treatment | 1-Line          | Phase III            | Randomized    | None         | 2 arms        | OS              |
| 87  | Atezolizumab  | Iv             | monoclonal antibody | Immune regulators   | Import         | Yes                  | Atezolizumab monotherapy for adjuvant treatment of stage II-IIIa NSCLC with PD-L1 TC $\geq 1\%$ after surgery and platinum-based chemotherapy                                                                                                                                                                                      | NSCLC                         | Solid       | Yes       | Combination    | No         | 2022                        | Standard approval    | NCT02486718               | Adjuvant Therapy         | /               | Phase III            | Randomized    | None         | 2 arms        | DFS             |
| 88  | Camrelizumab  | Iv             | monoclonal antibody | Immune regulators   | Domestic       | Yes                  | Treatment of patients with relapsed or refractory classical Hodgkin lymphoma who have received at least second-line systemic chemotherapy with a single agent                                                                                                                                                                      | HL                            | Hematoma    | No        | Combination    | Yes        | 2019                        | Conditional approval | NCT03155425               | Advanced-stage Treatment | $\geq 3$ -Line  | Phase II             | Nonrandomized | None         | 1 arm         | ORR             |
| 89  | Camrelizumab  | Iv             | monoclonal antibody | Immune regulators   | Domestic       | Yes                  | For the treatment of advanced hepatocellular carcinoma patients who have previously received sorafenib treatment and/or systemic chemotherapy containing oxaliplatin                                                                                                                                                               | HCC                           | Solid       | No        | Combination    | Yes        | 2020                        | Conditional approval | NCT02989922               | Advanced-stage Treatment | 2-Line          | Phase II             | Randomized    | None         | 2 arms        | ORR             |

| No. | Generic name | Delivery route | Product type        | Mechanism of action | Origin country | Exclusive production | Indication                                                                                                                                                                                                                                                                           | Classification of Indications | Cancer type | Biomarker | Treatment type | Reimbursed | Year of indication approval | Approval type        | Clinical trial | Phase of treatment       | Line            | Clinical trial phase | Allocation    | Masking      | Arms    | Primary Outcome |
|-----|--------------|----------------|---------------------|---------------------|----------------|----------------------|--------------------------------------------------------------------------------------------------------------------------------------------------------------------------------------------------------------------------------------------------------------------------------------|-------------------------------|-------------|-----------|----------------|------------|-----------------------------|----------------------|----------------|--------------------------|-----------------|----------------------|---------------|--------------|---------|-----------------|
| 90  | Camrelizumab | Iv             | monoclonal antibody | Immune regulators   | Domestic       | Yes                  | Monotherapy for the treatment of patients with locally advanced or metastatic esophageal squamous cell carcinoma who have experienced disease progression or intolerance to prior first-line chemotherapy                                                                            | EC                            | Solid       | No        | Combination    | Yes        | 2020                        | Special approval     | NCT03099382    | Advanced-stage Treatment | 2-Line          | Phase III            | Randomized    | None         | 2 arms  | OS              |
| 91  | Camrelizumab | Iv             | monoclonal antibody | Immune regulators   | Domestic       | Yes                  | Camrelizumab combined with pemetrexed and carboplatin is suitable for first-line treatment of EGFR-negative, ALK-negative, locally advanced or metastatic non-squamous NSCLC that is not amenable to surgery                                                                         | NSCLC                         | Solid       | Yes       | Combination    | Yes        | 2020                        | Special approval     | NCT03134872    | Advanced-stage Treatment | 1-Line          | Phase III            | Randomized    | None         | 2 arms  | PFS             |
| 92  | Camrelizumab | Iv             | monoclonal antibody | Immune regulators   | Domestic       | Yes                  | For the treatment of advanced nasopharyngeal carcinoma patients who have experienced disease progression or intolerance after second-line or above chemotherapy                                                                                                                      | NPC                           | Solid       | No        | Combination    | Yes        | 2021                        | Conditional approval | NCT03558191    | Advanced-stage Treatment | ≥3-Line         | Phase II             | Nonrandomized | None         | 1 arm   | ORR             |
| 93  | Camrelizumab | Iv             | monoclonal antibody | Immune regulators   | Domestic       | Yes                  | Camrelizumab combined with cisplatin and gemcitabine for first-line treatment of patients with locally recurrent or metastatic nasopharyngeal carcinoma                                                                                                                              | NPC                           | Solid       | No        | Combination    | Yes        | 2021                        | Priority approval    | NCT03707509    | Advanced-stage Treatment | 1-Line          | Phase III            | Randomized    | Double-blind | 2 arms  | PFS             |
| 94  | Camrelizumab | Iv             | monoclonal antibody | Immune regulators   | Domestic       | Yes                  | Camrelizumab combined with paclitaxel and carboplatin is a first-line treatment for locally advanced or metastatic squamous NSCLC                                                                                                                                                    | NSCLC                         | Solid       | No        | Combination    | Yes        | 2021                        | Standard approval    | NCT03668496    | Advanced-stage Treatment | 1-Line          | Phase III            | Randomized    | Double-blind | 2 arms  | PFS             |
| 95  | Camrelizumab | Iv             | monoclonal antibody | Immune regulators   | Domestic       | Yes                  | Camrelizumab combined with paclitaxel and cisplatin for first-line treatment of patients with unresectable locally advanced/recurrent or metastatic esophageal squamous cell carcinoma                                                                                               | EC                            | Solid       | No        | Combination    | Yes        | 2021                        | Standard approval    | NCT03691090    | Advanced-stage Treatment | 1-Line          | Phase III            | Randomized    | Double-blind | 2 arms  | OS              |
| 96  | Camrelizumab | Iv             | monoclonal antibody | Immune regulators   | Domestic       | Yes                  | Camrelizumab combined with apatinib mesylate for first-line treatment of patients with unresectable or metastatic hepatocellular carcinoma                                                                                                                                           | HCC                           | Solid       | No        | Combination    | Yes        | 2023                        | Standard approval    | NCT03764293    | Advanced-stage Treatment | 1-Line          | Phase III            | Randomized    | None         | 2 arms  | OS              |
| 97  | Tislelizumab | Iv             | monoclonal antibody | Immune regulators   | Domestic       | Yes                  | For the treatment of relapsed or refractory classical Hodgkin lymphoma in patients who have received at least second-line systemic chemotherapy                                                                                                                                      | HL                            | Hematoma    | No        | Combination    | Yes        | 2019                        | Special approval     | NCT03209973    | Advanced-stage Treatment | ≥3-Line         | Phase II             | Nonrandomized | None         | 1 arm   | ORR             |
| 98  | Tislelizumab | Iv             | monoclonal antibody | Immune regulators   | Domestic       | Yes                  | Treatment for locally advanced or metastatic urothelial carcinoma with high PD-L1 expression after platinum-based chemotherapy failure or progression within 12 months of neoadjuvant/adjuvant chemotherapy                                                                          | UC                            | Solid       | Yes       | Combination    | Yes        | 2020                        | Special approval     | NCT04004221    | Advanced-stage Treatment | 2-Line          | Phase II             | Nonrandomized | None         | 1 arm   | ORR             |
| 99  | Tislelizumab | Iv             | monoclonal antibody | Immune regulators   | Domestic       | Yes                  | Tislelizumab combined with paclitaxel and carboplatin is a first-line treatment for unresectable locally advanced or metastatic squamous NSCLC                                                                                                                                       | NSCLC                         | Solid       | No        | Combination    | Yes        | 2021                        | Standard approval    | NCT03594747    | Advanced-stage Treatment | 1-Line          | Phase III            | Randomized    | None         | ≥3 arms | PFS             |
| 100 | Tislelizumab | Iv             | monoclonal antibody | Immune regulators   | Domestic       | Yes                  | Tislelizumab with pemetrexed and platinum is a first-line treatment for EGFR-negative, ALK-negative, unresectable advanced or metastatic non-squamous NSCLC                                                                                                                          | NSCLC                         | Solid       | Yes       | Combination    | Yes        | 2021                        | Standard approval    | NCT03663205    | Advanced-stage Treatment | 1-Line          | Phase III            | Randomized    | None         | 2 arms  | PFS             |
| 101 | Tislelizumab | Iv             | monoclonal antibody | Immune regulators   | Domestic       | Yes                  | Indicated for the treatment of hepatocellular carcinoma in patients who have received at least one systemic therapy                                                                                                                                                                  | HCC                           | Solid       | No        | Combination    | Yes        | 2021                        | Conditional approval | NCT03419897    | Advanced-stage Treatment | 2-Line          | Phase II             | Nonrandomized | None         | 1 arm   | ORR             |
| 102 | Tislelizumab | Iv             | monoclonal antibody | Immune regulators   | Domestic       | Yes                  | Monotherapy is indicated for adults with EGFR and ALK-negative, platinum-treated, locally advanced or metastatic NSCLC (non-squamous or squamous) with disease progression or intolerance                                                                                            | NSCLC                         | Solid       | Yes       | Combination    | Yes        | 2021                        | Standard approval    | NCT03358875    | Advanced-stage Treatment | 2-Line          | Phase III            | Randomized    | None         | 2 arms  | OS              |
| 103 | Tislelizumab | Iv             | monoclonal antibody | Immune regulators   | Domestic       | Yes                  | For adult patients with unresectable or metastatic advanced solid tumors, including MSI-H or dMMR, with progression after treatment with fluoropyrimidines, oxaliplatin, and irinotecan for colorectal cancer, or other advanced solid tumors with no satisfactory treatment options | MSI-H/dMMR                    | Solid       | Yes       | Combination    | Yes        | 2022                        | Conditional approval | NCT03736889    | Advanced-stage Treatment | 2-Line & 3-Line | Phase II             | Nonrandomized | None         | 1 arm   | ORR             |
| 104 | Tislelizumab | Iv             | monoclonal antibody | Immune regulators   | Domestic       | Yes                  | For the treatment of patients with locally advanced or metastatic esophageal squamous cell carcinoma who have progressed or are intolerant to first-line standard chemotherapy                                                                                                       | EC                            | Solid       | No        | Combination    | Yes        | 2022                        | Standard approval    | NCT03430843    | Advanced-stage Treatment | 2-Line          | Phase III            | Randomized    | None         | 2 arms  | OS              |
| 105 | Tislelizumab | Iv             | monoclonal antibody | Immune regulators   | Domestic       | Yes                  | Tislelizumab combined with gemcitabine and cisplatin for first-line treatment of recurrent or metastatic nasopharyngeal carcinoma                                                                                                                                                    | NPC                           | Solid       | No        | Combination    | Yes        | 2022                        | Standard approval    | NCT03924986    | Advanced-stage Treatment | 1-Line          | Phase III            | Randomized    | Double-blind | 2 arms  | PFS             |
| 106 | Tislelizumab | Iv             | monoclonal antibody | Immune regulators   | Domestic       | Yes                  | Tislelizumab combined with fluoropyrimidine and platinum-based chemotherapy for the first-line treatment of locally advanced or metastatic gastric or gastroesophageal junction adenocarcinoma with high PD-L1 expression                                                            | GC                            | Solid       | Yes       | Combination    | Yes        | 2023                        | Standard approval    | NCT03777657    | Advanced-stage Treatment | 1-Line          | Phase III            | Randomized    | Double-blind | 2 arms  | OS              |
| 107 | Tislelizumab | Iv             | monoclonal antibody | Immune regulators   | Domestic       | Yes                  | Tislelizumab combined with paclitaxel and platinum-based drugs or fluoropyrimidine and platinum-based drugs for first-line treatment of unresectable locally advanced, recurrent, or metastatic esophageal squamous cell carcinoma                                                   | EC                            | Solid       | No        | Combination    | Yes        | 2023                        | Standard approval    | NCT03783442    | Advanced-stage Treatment | 1-Line          | Phase III            | Randomized    | Double-blind | 2 arms  | OS              |
| 108 | Tislelizumab | Iv             | monoclonal antibody | Immune regulators   | Domestic       | Yes                  | Tislelizumab monotherapy is suitable for the first-line treatment of patients with unresectable or metastatic hepatocellular carcinoma                                                                                                                                               | HCC                           | Solid       | No        | Combination    | Yes        | 2023                        | Standard approval    | NCT03412773    | Advanced-stage Treatment | 1-Line          | Phase III            | Randomized    | None         | 2 arms  | OS              |
| 109 | Tislelizumab | Iv             | monoclonal antibody | Immune regulators   | Domestic       | Yes                  | Tislelizumab combined with etoposide and platinum-based chemotherapy for first-line treatment of extensive-stage small cell lung cancer (ES-SCLC)                                                                                                                                    | SCLC                          | Solid       | No        | Combination    | Yes        | 2024                        | Standard approval    | NCT04005716    | Advanced-stage Treatment | 1-Line          | Phase III            | Randomized    | Double-blind | 2 arms  | OS              |

| No. | Generic name | Delivery route | Product type        | Mechanism of action | Origin country | Exclusive production | Indication                                                                                                                                                                                                                         | Classification of Indications | Cancer type | Biomarker | Treatment type | Reimbursed | Year of indication approval | Approval type        | Clinical trial | Phase of treatment       | Line            | Clinical trial phase | Allocation    | Masking      | Arms    | Primary Outcome |
|-----|--------------|----------------|---------------------|---------------------|----------------|----------------------|------------------------------------------------------------------------------------------------------------------------------------------------------------------------------------------------------------------------------------|-------------------------------|-------------|-----------|----------------|------------|-----------------------------|----------------------|----------------|--------------------------|-----------------|----------------------|---------------|--------------|---------|-----------------|
| 110 | Tislelizumab | Iv             | monoclonal antibody | Immune regulators   | Domestic       | Yes                  | Tislelizumab combined with platinum-based chemotherapy as neoadjuvant therapy, followed by monotherapy, for resectable stage II or IIIA NSCLC                                                                                      | NSCLC                         | Solid       | No        | Combination    | No         | 2024                        | Standard approval    | NCT04379635    | Neoadjuvant Therapy      | /               | Phase III            | Randomized    | Double-blind | 2 arms  | MPR &EFS        |
| 111 | Sintilimab   | Iv             | monoclonal antibody | Immune regulators   | Domestic       | Yes                  | Treatment of patients with relapsed or refractory classical Hodgkin lymphoma who have received at least second-line systemic chemotherapy with single-agent therapy                                                                | HL                            | Hematoma    | No        | Combination    | Yes        | 2018                        | Special approval     | NCT03114683    | Advanced-stage Treatment | ≥3-Line         | Phase II             | Nonrandomized | None         | 1 arm   | ORR             |
| 112 | Sintilimab   | Iv             | monoclonal antibody | Immune regulators   | Domestic       | Yes                  | Sintilimab combined with paclitaxel and cisplatin or fluorouracil and cisplatin for first-line treatment of unresectable locally advanced, recurrent, or metastatic esophageal squamous cell carcinoma                             | EC                            | Solid       | No        | Combination    | Yes        | 2020                        | Standard approval    | NCT03748134    | Advanced-stage Treatment | 1-Line          | Phase III            | Randomized    | Double-blind | 2 arms  | OS              |
| 113 | Sintilimab   | Iv             | monoclonal antibody | Immune regulators   | Domestic       | Yes                  | Sintilimab with pemtredex and platinum-based chemotherapy is a first-line treatment for EGFR and ALK-negative, locally advanced or metastatic non-squamous NSCLC not amenable to surgery                                           | NSCLC                         | Solid       | Yes       | Combination    | Yes        | 2021                        | Standard approval    | NCT03607539    | Advanced-stage Treatment | 1-Line          | Phase III            | Randomized    | Double-blind | 2 arms  | PFS             |
| 114 | Sintilimab   | Iv             | monoclonal antibody | Immune regulators   | Domestic       | Yes                  | Sintilimab with gemcitabine and platinum-based chemotherapy is a first-line treatment for unresectable locally advanced or metastatic squamous NSCLC                                                                               | NSCLC                         | Solid       | No        | Combination    | Yes        | 2021                        | Standard approval    | NCT03629925    | Advanced-stage Treatment | 1-Line          | Phase III            | Randomized    | Double-blind | 2 arms  | PFS             |
| 115 | Sintilimab   | Iv             | monoclonal antibody | Immune regulators   | Domestic       | Yes                  | Sintilimab combined with bevacizumab (Daoyoutong®) for the first-line treatment of patients with previously untreated, unresectable or metastatic hepatocellular carcinoma                                                         | HCC                           | Solid       | No        | Combination    | Yes        | 2021                        | Priority approval    | NCT03794440    | Advanced-stage Treatment | 1-Line          | Phase II/III         | Randomized    | None         | 2 arms  | OS              |
| 116 | Sintilimab   | Iv             | monoclonal antibody | Immune regulators   | Domestic       | Yes                  | Sintilimab combined with fluoropyrimidine and platinum-based chemotherapy for the first-line treatment of unresectable locally advanced, recurrent, or metastatic gastric and gastroesophageal junction adenocarcinoma             | GC                            | Solid       | No        | Combination    | Yes        | 2022                        | Standard approval    | NCT03745170    | Advanced-stage Treatment | 1-Line          | Phase III            | Randomized    | Double-blind | 2 arms  | OS              |
| 117 | Sintilimab   | Iv             | monoclonal antibody | Immune regulators   | Domestic       | Yes                  | Sintilimab with bevacizumab, pemtredex, and cisplatin is for patients with EGFR-mutated, locally advanced or metastatic non-squamous NSCLC who have failed EGFR-TKI treatment                                                      | NSCLC                         | Solid       | Yes       | Combination    | Yes        | 2023                        | Standard approval    | NCT03802240    | Advanced-stage Treatment | 2-Line          | Phase III            | Randomized    | Double-blind | ≥3 arms | PFS             |
| 118 | Ipilimumab   | Iv             | monoclonal antibody | Immune regulators   | Import         | Yes                  | Ipilimumab combined with nivolumab for adult patients with unresectable, previously untreated non-epithelioid malignant pleural mesothelioma                                                                                       | MPM                           | Solid       | No        | Combination    | No         | 2021                        | Conditional approval | NCT02899299    | Advanced-stage Treatment | 1-Line          | Phase III            | Randomized    | None         | 2 arms  | OS              |
| 119 | Ipilimumab   | Iv             | monoclonal antibody | Immune regulators   | Import         | Yes                  | For the first-line treatment of patients with unresectable or metastatic microsatellite instability-high (MSI-H) or mismatch repair deficient (dMMR) colorectal cancer (CRC)                                                       | CRC                           | Solid       | Yes       | Combination    | No         | 2024                        | Priority approval    | NCT04008030    | Advanced-stage Treatment | 1-Line          | Phase III            | Randomized    | None         | 2 arms  | PFS             |
| 120 | Sugemalimab  | Iv             | monoclonal antibody | Immune regulators   | Domestic       | Yes                  | Sugemalimab with pemtredex and carboplatin for first-line treatment of metastatic EGFR-negative, ALK-negative non-squamous NSCLC; with paclitaxel and carboplatin for metastatic squamous NSCLC                                    | NSCLC                         | Solid       | Yes       | Combination    | No         | 2021                        | Standard approval    | NCT03789604    | Advanced-stage Treatment | 1-Line          | Phase III            | Randomized    | Double-blind | 2 arms  | PFS             |
| 121 | Sugemalimab  | Iv             | monoclonal antibody | Immune regulators   | Domestic       | Yes                  | Indicated for the treatment of patients with unresectable stage III non-small NSCLC who have not experienced disease progression after platinum-based concurrent or sequential chemoradiotherapy                                   | NSCLC                         | Solid       | No        | Combination    | No         | 2022                        | Standard approval    | NCT03728556    | Adjuvant Therapy         | /               | Phase III            | Randomized    | Double-blind | 2 arms  | PFS             |
| 122 | Sugemalimab  | Iv             | monoclonal antibody | Immune regulators   | Domestic       | Yes                  | Single drug for the treatment of adult patients with relapsed or refractory extranodal NK/T-cell lymphoma (R/R ENKTL)                                                                                                              | NHL                           | Hematoma    | No        | Combination    | No         | 2023                        | Conditional approval | NCT03595657    | Advanced-stage Treatment | 2-Line & 3-Line | Phase II             | Nonrandomized | None         | 1 arm   | ORR             |
| 123 | Sugemalimab  | Iv             | monoclonal antibody | Immune regulators   | Domestic       | Yes                  | Sugemalimab combined with fluoropyrimidine and platinum-based chemotherapy drugs for the first-line treatment of unresectable locally advanced, recurrent, or metastatic esophageal squamous cell carcinoma (ESCC)                 | EC                            | Solid       | No        | Combination    | No         | 2023                        | Standard approval    | NCT04187352    | Advanced-stage Treatment | 1-Line          | Phase III            | Randomized    | Double-blind | 2 arms  | OS              |
| 124 | Sugemalimab  | Iv             | monoclonal antibody | Immune regulators   | Domestic       | Yes                  | Sugemalimab with fluoropyrimidine and platinum chemotherapy for first-line treatment of unresectable advanced or metastatic gastric and gastroesophageal junction adenocarcinoma with PD-L1 (CPS ≥ 5)                              | GC                            | Solid       | Yes       | Combination    | No         | 2024                        | Standard approval    | NCT03802591    | Advanced-stage Treatment | 1-Line          | Phase III            | Randomized    | Double-blind | 2 arms  | OS              |
| 125 | Toripalimab  | Iv             | monoclonal antibody | Immune regulators   | Domestic       | Yes                  | Toripalimab is used for the treatment of patients with unresectable or metastatic melanoma who have failed prior systemic therapy                                                                                                  | MEL                           | Solid       | No        | Combination    | Yes        | 2018                        | Conditional approval | NCT03013101    | Advanced-stage Treatment | 2-Line          | Phase II             | Nonrandomized | None         | 1 arm   | ORR             |
| 126 | Toripalimab  | Iv             | monoclonal antibody | Immune regulators   | Domestic       | Yes                  | Toripalimab is suitable for the treatment of locally advanced or metastatic urothelial carcinoma that has progressed within 12 months after failure of platinum-based chemotherapy, including neoadjuvant or adjuvant chemotherapy | UC                            | Solid       | No        | Combination    | Yes        | 2021                        | Conditional approval | NCT03113266    | Advanced-stage Treatment | 2-Line          | Phase II             | Nonrandomized | None         | 1 arm   | ORR             |
| 127 | Toripalimab  | Iv             | monoclonal antibody | Immune regulators   | Domestic       | Yes                  | For the treatment of patients with recurrent/metastatic nasopharyngeal carcinoma who have failed second-line or above systemic therapy                                                                                             | NPC                           | Solid       | No        | Combination    | Yes        | 2021                        | Conditional approval | NCT02915432    | Advanced-stage Treatment | ≥3-Line         | Phase II             | Nonrandomized | None         | 1 arm   | ORR             |
| 128 | Toripalimab  | Iv             | monoclonal antibody | Immune regulators   | Domestic       | Yes                  | Toripalimab combined with cisplatin and gemcitabine for first-line treatment of patients with locally recurrent or metastatic nasopharyngeal carcinoma                                                                             | NPC                           | Solid       | No        | Combination    | Yes        | 2021                        | Standard approval    | NCT03581786    | Advanced-stage Treatment | 1-Line          | Phase III            | Randomized    | Double-blind | 2 arms  | PFS             |
| 129 | Toripalimab  | Iv             | monoclonal antibody | Immune regulators   | Domestic       | Yes                  | Toripalimab combined with paclitaxel and cisplatin is suitable for first-line treatment of unresectable locally advanced/recurrent or metastatic esophageal squamous cell carcinoma                                                | EC                            | Solid       | No        | Combination    | Yes        | 2022                        | Standard approval    | NCT03829969    | Advanced-stage Treatment | 1-Line          | Phase III            | Randomized    | Double-blind | 2 arms  | OS              |

| No. | Generic name | Delivery route | Product type        | Mechanism of action | Origin country | Exclusive production | Indication                                                                                                                                                                                                                                               | Classification of Indications | Cancer type | Biomarker | Treatment type | Reimbursed | Year of indication approval | Approval type        | Clinical trial | Phase of treatment       | Line            | Clinical trial phase | Allocation    | Masking      | Arms   | Primary Outcome |
|-----|--------------|----------------|---------------------|---------------------|----------------|----------------------|----------------------------------------------------------------------------------------------------------------------------------------------------------------------------------------------------------------------------------------------------------|-------------------------------|-------------|-----------|----------------|------------|-----------------------------|----------------------|----------------|--------------------------|-----------------|----------------------|---------------|--------------|--------|-----------------|
| 130 | Toripalimab  | Iv             | monoclonal antibody | Immune regulators   | Domestic       | Yes                  | Toripalimab with pemtrexed and platinum for first-line treatment of advanced or metastatic EGFR- and ALK-negative non-squamous NSCLC                                                                                                                     | NSCLC                         | Solid       | Yes       | Combination    | Yes        | 2022                        | Standard approval    | NCT03856411    | Advanced-stage Treatment | 1-Line          | Phase III            | Randomized    | Double-blind | 2 arms | PFS             |
| 131 | Toripalimab  | Iv             | monoclonal antibody | Immune regulators   | Domestic       | Yes                  | Toripalimab with chemotherapy for perioperative treatment, followed by adjuvant monotherapy, for resectable stage IIIA-IIIIB NSCLC                                                                                                                       | NSCLC                         | Solid       | No        | Combination    | Yes        | 2023                        | Standard approval    | NCT04158440    | Adjuvant Therapy         | /               | Phase III            | Randomized    | Double-blind | 2 arms | MPR & EFS       |
| 132 | Toripalimab  | Iv             | monoclonal antibody | Immune regulators   | Domestic       | Yes                  | Toripalimab combined with axitinib for first-line treatment of patients with intermediate or high-risk, unresectable or metastatic renal cell carcinoma                                                                                                  | RCC                           | Solid       | No        | Combination    | Yes        | 2024                        | Standard approval    | NCT04394975    | Advanced-stage Treatment | 1-Line          | Phase III            | Randomized    | None         | 2 arms | PFS             |
| 133 | Toripalimab  | Iv             | monoclonal antibody | Immune regulators   | Domestic       | Yes                  | Toripalimab combined with etoposide and platinum is indicated for first-line treatment of extensive-stage small cell lung cancer (ES-SCLC)                                                                                                               | SCLC                          | Solid       | No        | Combination    | Yes        | 2024                        | Standard approval    | NCT04012606    | Advanced-stage Treatment | 1-Line          | Phase III            | Randomized    | Double-blind | 2 arms | OS              |
| 134 | Toripalimab  | Iv             | monoclonal antibody | Immune regulators   | Domestic       | Yes                  | Toripalimab combined with paclitaxel for injection (albumin-bound) is indicated for first-line treatment of recurrent or metastatic PD-L1-positive (CPS ≥ 1) triple-negative breast cancer (TNBC) as assessed by a validated test                        | BC                            | Solid       | Yes       | Combination    | Yes        | 2024                        | Standard approval    | NCT03777579    | Advanced-stage Treatment | 1-Line          | Phase III            | Randomized    | Double-blind | 2 arms | PFS             |
| 135 | Serplulimab  | Iv             | monoclonal antibody | Immune regulators   | Domestic       | Yes                  | For adults with unresectable or metastatic MSI-H solid tumors: colorectal cancer after fluoropyrimidines, oxaliplatin, and irinotecan; gastric cancer after two prior therapies; other solid tumors after one prior therapy, with no alternative options | MSI-H/dMMR                    | Solid       | Yes       | Combination    | No         | 2022                        | Conditional approval | NCT03941574    | Advanced-stage Treatment | 2-Line & 3-Line | Phase II             | Nonrandomized | None         | 1 arm  | ORR             |
| 136 | Serplulimab  | Iv             | monoclonal antibody | Immune regulators   | Domestic       | Yes                  | Serplulimab combined with carboplatin and albumin-bound paclitaxel is indicated for the first-line treatment of unresectable locally advanced or metastatic squamous NSCLC                                                                               | NSCLC                         | Solid       | No        | Combination    | No         | 2022                        | Standard approval    | NCT04033354    | Advanced-stage Treatment | 1-Line          | Phase III            | Randomized    | Double-blind | 2 arms | PFS             |
| 137 | Serplulimab  | Iv             | monoclonal antibody | Immune regulators   | Domestic       | Yes                  | Serplulimab combined with carboplatin and etoposide is suitable for first-line treatment of extensive-stage small cell lung cancer (ES-SCLC)                                                                                                             | SCLC                          | Solid       | No        | Combination    | No         | 2023                        | Standard approval    | NCT04063163    | Advanced-stage Treatment | 1-Line          | Phase III            | Randomized    | Double-blind | 2 arms | OS              |
| 138 | Serplulimab  | Iv             | monoclonal antibody | Immune regulators   | Domestic       | Yes                  | Serplulimab combined with fluoropyrimidine and platinum drugs for the first-line treatment of PD-L1 positive, unresectable locally advanced/recurrent or metastatic esophageal squamous cell carcinoma (ESCC)                                            | EC                            | Solid       | Yes       | Combination    | No         | 2023                        | Standard approval    | NCT03958890    | Advanced-stage Treatment | 1-Line          | Phase III            | Randomized    | Double-blind | 2 arms | PFS             |
| 139 | Penpulimab   | Iv             | monoclonal antibody | Immune regulators   | Domestic       | Yes                  | Indicated for adult patients with relapsed or refractory classical Hodgkin lymphoma who have received at least two lines of systemic chemotherapy                                                                                                        | HL                            | Hematoma    | No        | Combination    | No         | 2021                        | Conditional approval | NCT03722147    | Advanced-stage Treatment | ≥3-Line         | Phase II             | Nonrandomized | None         | 1 arm  | ORR             |
| 140 | Penpulimab   | Iv             | monoclonal antibody | Immune regulators   | Domestic       | Yes                  | Penpulimab combined with paclitaxel and carboplatin is indicated for first-line treatment of locally advanced or metastatic squamous NSCLC                                                                                                               | NSCLC                         | Solid       | No        | Combination    | No         | 2023                        | Standard approval    | NCT03866993    | Advanced-stage Treatment | 1-Line          | Phase III            | Randomized    | Double-blind | 2 arms | PFS             |
| 141 | Penpulimab   | Iv             | monoclonal antibody | Immune regulators   | Domestic       | Yes                  | For the treatment of adult patients with recurrent/metastatic nasopharyngeal cancer who have failed prior second-line or higher systemic therapy                                                                                                         | NPC                           | Solid       | No        | Combination    | No         | 2024                        | Standard approval    | NCT03866967    | Advanced-stage Treatment | ≥3-Line         | Phase II             | Nonrandomized | None         | 1 arm  | ORR             |
| 142 | Sorafenib    | Po             | small molecule      | Targeted agents     | Import         | No                   | For the treatment of unresectable advanced renal cell carcinoma                                                                                                                                                                                          | RCC                           | Solid       | No        | Combination    | Yes        | 2006                        | not available        | NCT00073307    | Advanced-stage Treatment | 1-Line          | Phase III            | Randomized    | Double-blind | 2 arms | OS              |
| 143 | Sorafenib    | Po             | small molecule      | Targeted agents     | Import         | No                   | For the treatment of unresectable or metastatic hepatocellular carcinoma                                                                                                                                                                                 | HCC                           | Solid       | No        | Combination    | Yes        | 2008                        | not available        | NCT00105443    | Advanced-stage Treatment | 1-Line          | Phase III            | Randomized    | Double-blind | 2 arms | OS              |
| 144 | Sorafenib    | Po             | small molecule      | Targeted agents     | Import         | No                   | For the treatment of locally recurrent or metastatic progressive radioiodine-refractory differentiated thyroid cancer                                                                                                                                    | TC                            | Solid       | No        | Combination    | Yes        | 2017                        | not available        | NCT00984282    | Advanced-stage Treatment | 2-Line          | Phase III            | Randomized    | Double-blind | 2 arms | PFS             |
| 145 | Regorafenib  | Po             | small molecule      | Targeted agents     | Import         | No                   | For metastatic colorectal cancer (mCRC) patients previously treated with fluoropyrimidines, oxaliplatin, and irinotecan, and those unsuitable for or previously treated with anti-VEGF or anti-EGFR (RAS wild-type) therapy                              | CRC                           | Solid       | No        | Combination    | Yes        | 2017                        | Special approval     | NCT01103323    | Advanced-stage Treatment | ≥3-Line         | Phase III            | Randomized    | Double-blind | 2 arms | OS              |
| 146 | Regorafenib  | Po             | small molecule      | Targeted agents     | Import         | No                   | Indicated for locally advanced, unresectable, or metastatic gastrointestinal stromal tumor (GIST) patients who have previously received imatinib mesylate and sunitinib malate treatment                                                                 | GC                            | Solid       | No        | Combination    | Yes        | 2017                        | Special approval     | NCT01271712    | Advanced-stage Treatment | ≥3-Line         | Phase III            | Randomized    | Double-blind | 2 arms | PFS             |
| 147 | Regorafenib  | Po             | small molecule      | Targeted agents     | Import         | No                   | Indicated for hepatocellular carcinoma (HCC) patients who have previously received sorafenib treatment                                                                                                                                                   | HCC                           | Solid       | No        | Combination    | Yes        | 2017                        | not available        | NCT01774344    | Advanced-stage Treatment | 2-Line          | Phase III            | Randomized    | Double-blind | 2 arms | OS              |
| 148 | Lenvatinib   | Po             | small molecule      | Targeted agents     | Import         | No                   | Monotherapy is indicated for unresectable hepatocellular carcinoma patients who have not previously received systemic treatment                                                                                                                          | HCC                           | Solid       | No        | Combination    | Yes        | 2018                        | Special approval     | NCT01761266    | Advanced-stage Treatment | 1-Line          | Phase III            | Randomized    | None         | 2 arms | OS              |

| No. | Generic name      | Delivery route | Product type        | Mechanism of action | Origin country | Exclusive production | Indication                                                                                                                                                                                                                         | Classification of Indications | Cancer type | Biomarker | Treatment type | Reimbursed | Year of indication approval | Approval type         | Clinical trial            | Phase of treatment       | Line            | Clinical trial phase | Allocation    | Masking      | Arms   | Primary Outcome      |
|-----|-------------------|----------------|---------------------|---------------------|----------------|----------------------|------------------------------------------------------------------------------------------------------------------------------------------------------------------------------------------------------------------------------------|-------------------------------|-------------|-----------|----------------|------------|-----------------------------|-----------------------|---------------------------|--------------------------|-----------------|----------------------|---------------|--------------|--------|----------------------|
| 149 | Lenvatinib        | Po             | small molecule      | Targeted agents     | Import         | No                   | Indicated for patients with progressive, locally advanced, or metastatic radioiodine-refractory differentiated thyroid cancer                                                                                                      | TC                            | Solid       | No        | Combination    | Yes        | 2020                        | Standard approval     | NCT01321554               | Advanced-stage Treatment | 1-Line          | Phase III            | Randomized    | Double-blind | 2 arms | PFS                  |
| 150 | Donafenib         | Po             | small molecule      | Targeted agents     | Domestic       | Yes                  | Indicated for unresectable hepatocellular carcinoma patients who have not previously received systemic treatment                                                                                                                   | HCC                           | Solid       | No        | Combination    | Yes        | 2021                        | Priority approval     | NCT02645981               | Advanced-stage Treatment | 1-Line          | Phase III            | Randomized    | None         | 2 arms | OS                   |
| 151 | Donafenib         | Po             | small molecule      | Targeted agents     | Domestic       | Yes                  | Indicated for patients with progressive, locally advanced, or metastatic radioiodine-refractory differentiated thyroid cancer                                                                                                      | TC                            | Solid       | No        | Combination    | Yes        | 2022                        | Standard approval     | NCT03602495               | Advanced-stage Treatment | 1-Line          | Phase III            | Randomized    | Double-blind | 2 arms | PFS                  |
| 152 | Trastuzumab       | Iv             | monoclonal antibody | Targeted agents     | Import         | No                   | Indicated for HER2-overexpressing metastatic breast cancer: in combination with paclitaxel or docetaxel, for metastatic breast cancer patients who have not received chemotherapy                                                  | BC                            | Solid       | Yes       | Combination    | Yes        | 2002                        | not available         | not available             | Advanced-stage Treatment | 1-Line          | Phase III            | Randomized    | None         | 2 arms | TTP                  |
| 153 | Trastuzumab       | Iv             | monoclonal antibody | Targeted agents     | Import         | No                   | Indicated for HER2-overexpressing metastatic breast cancer: as a monotherapy for metastatic breast cancer patients who have received one or more prior chemotherapy regimens                                                       | BC                            | Solid       | Yes       | Combination    | Yes        | 2002                        | not available         | not available             | Advanced-stage Treatment | 2-Line & 3-Line | Phase III            | Nonrandomized | None         | 1 arm  | ORR                  |
| 154 | Trastuzumab       | Iv             | monoclonal antibody | Targeted agents     | Import         | No                   | Indicated for HER2-positive early breast cancer                                                                                                                                                                                    | BC                            | Solid       | Yes       | Combination    | Yes        | 2002                        | not available         | not available             | Adjuvant Therapy         | /               | Phase III            | Randomized    | None         | 2 arms | DFS                  |
| 155 | Trastuzumab       | Iv             | monoclonal antibody | Targeted agents     | Import         | No                   | Trastuzumab with capecitabine or 5-FU and cisplatin for HER2-overexpressing metastatic gastric or gastroesophageal junction adenocarcinoma patients without prior metastatic treatment                                             | GC                            | Solid       | Yes       | Combination    | Yes        | 2012                        | not available         | NCT01041404               | Advanced-stage Treatment | 1-Line          | Phase III            | Randomized    | None         | 2 arms | OS                   |
| 156 | Apatinib          | Po             | small molecule      | Targeted agents     | Domestic       | Yes                  | Monotherapy is indicated for advanced gastric adenocarcinoma or gastroesophageal junction adenocarcinoma patients who have progressed or relapsed after receiving at least two prior lines of systemic chemotherapy                | GC                            | Solid       | No        | Combination    | Yes        | 2014                        | Special approval      | NCT01512745               | Advanced-stage Treatment | ≥3-Line         | Phase III            | Randomized    | Double-blind | 2 arms | OS                   |
| 157 | Apatinib          | Po             | small molecule      | Targeted agents     | Domestic       | Yes                  | Monotherapy for patients with advanced hepatocellular carcinoma who have failed or were intolerant to at least one prior line of systemic therapy                                                                                  | HCC                           | Solid       | No        | Combination    | Yes        | 2020                        | Standard approval     | NCT02329860               | Advanced-stage Treatment | 2-Line & 3-Line | Phase III            | Randomized    | Double-blind | 2 arms | OS                   |
| 158 | Apatinib          | Po             | small molecule      | Targeted agents     | Domestic       | Yes                  | Apatinib combined with carrelizumab injection for first-line treatment of patients with unresectable or metastatic hepatocellular carcinoma                                                                                        | HCC                           | Solid       | No        | Combination    | Yes        | 2023                        | Standard approval     | NCT03764293               | Advanced-stage Treatment | 1-Line          | Phase III            | Randomized    | None         | 2 arms | OS                   |
| 159 | Disitamab Vedotin | Iv             | ADC                 | Targeted agents     | Domestic       | Yes                  | For patients with HER2 overexpressing locally advanced or metastatic gastric cancer (including gastroesophageal junction adenocarcinoma) who have received at least two prior systemic chemotherapies                              | GC                            | Solid       | Yes       | Combination    | Yes        | 2021                        | Conditional approval  | NCT03556345               | Advanced-stage Treatment | ≥3-Line         | Phase II             | Nonrandomized | None         | 1 arm  | ORR                  |
| 160 | Disitamab Vedotin | Iv             | ADC                 | Targeted agents     | Domestic       | Yes                  | Indicated for patients with locally advanced or metastatic urothelial carcinoma who have received prior platinum-based chemotherapy and have HER2 overexpression                                                                   | UC                            | Solid       | Yes       | Combination    | Yes        | 2021                        | Special approval      | NCT03809013 & NCT03507166 | Advanced-stage Treatment | 2-Line          | Phase II             | Nonrandomized | None         | 1 arm  | ORR                  |
| 161 | Disitamab Vedotin | Iv             | ADC                 | Targeted agents     | Domestic       | Yes                  | Disitamab Vedotin combined with toripalimab injection is indicated for perioperative treatment of muscle-invasive bladder cancer                                                                                                   | Bladder Cancer                | Solid       | No        | Combination    | No         | 2024                        | Breakthrough approval | NCT05297552               | Neoadjuvant Therapy      | /               | Phase II             | Nonrandomized | None         | 1 arm  | ORR                  |
| 162 | Ramucirumab       | Iv             | monoclonal antibody | Targeted agents     | Import         | Yes                  | Ramucirumab combined with paclitaxel for the treatment of advanced gastric or gastroesophageal junction adenocarcinoma patients who have disease progression during or after fluoropyrimidine- or platinum-containing chemotherapy | GC                            | Solid       | No        | Combination    | No         | 2022                        | Standard approval     | NCT01170663               | Advanced-stage Treatment | 2-Line          | Phase III            | Randomized    | Double-blind | 2 arms | OS                   |
| 163 | Ramucirumab       | Iv             | monoclonal antibody | Targeted agents     | Import         | Yes                  | Monotherapy for the treatment of hepatocellular carcinoma patients who have previously received sorafenib treatment and have an alpha-fetoprotein level of ≥400ng/mL                                                               | HCC                           | Solid       | No        | Combination    | No         | 2022                        | Standard approval     | NCT02435433               | Advanced-stage Treatment | 2-Line          | Phase III            | Randomized    | Double-blind | 2 arms | OS                   |
| 164 | Imatinib          | Po             | small molecule      | Targeted agents     | Import         | No                   | Indicated for the treatment of chronic phase Philadelphia chromosome-positive chronic myelogenous leukemia (Ph+ CML)                                                                                                               | LEUK                          | Hematoma    | No        | Combination    | Yes        | 2002                        | not available         | not available             | Advanced-stage Treatment | 1-Line          | Phase III            | Randomized    | None         | 2 arms | progression          |
| 165 | Imatinib          | Po             | small molecule      | Targeted agents     | Import         | No                   | Indicated for the treatment of accelerated phase Philadelphia chromosome-positive chronic myelogenous leukemia (Ph+ CML)                                                                                                           | LEUK                          | Hematoma    | No        | Combination    | Yes        | 2002                        | not available         | not available             | Advanced-stage Treatment | 1-Line          | Phase II             | Nonrandomized | None         | 2 arms | Hematologic response |
| 166 | Imatinib          | Po             | small molecule      | Targeted agents     | Import         | No                   | Indicated for the treatment of blast crisis Philadelphia chromosome-positive chronic myelogenous leukemia (Ph+ CML)                                                                                                                | LEUK                          | Hematoma    | No        | Combination    | Yes        | 2002                        | not available         | not available             | Advanced-stage Treatment | 1-Line          | Phase II             | Nonrandomized | None         | 2 arms | Hematologic response |
| 167 | Imatinib          | Po             | small molecule      | Targeted agents     | Import         | No                   | Indicated for the treatment of adult patients with unresectable and/or metastatic malignant gastrointestinal stromal tumors (GIST)                                                                                                 | GC                            | Solid       | No        | Combination    | Yes        | 2003                        | not available         | not available             | Advanced-stage Treatment | 1-Line          | Phase II             | Randomized    | None         | 2 arms | objective responses  |

| No. | Generic name   | Delivery route | Product type        | Mechanism of action | Origin country | Exclusive production | Indication                                                                                                                                                                                                                                                                                                    | Classification of Indications | Cancer type | Biomarker | Treatment type | Reimbursed | Year of indication approval | Approval type        | Clinical trial            | Phase of treatment       | Line            | Clinical trial phase | Allocation    | Masking      | Arms    | Primary Outcome              |
|-----|----------------|----------------|---------------------|---------------------|----------------|----------------------|---------------------------------------------------------------------------------------------------------------------------------------------------------------------------------------------------------------------------------------------------------------------------------------------------------------|-------------------------------|-------------|-----------|----------------|------------|-----------------------------|----------------------|---------------------------|--------------------------|-----------------|----------------------|---------------|--------------|---------|------------------------------|
| 168 | Imatinib       | Po             | small molecule      | Targeted agents     | Import         | No                   | Imatinib combined with chemotherapy is indicated for the treatment of newly diagnosed Philadelphia chromosome-positive acute lymphoblastic leukemia (Ph+ ALL) in pediatric patients                                                                                                                           | LEUK                          | Hematoma    | Yes       | Combination    | Yes        | not available               | not available        | not available             | Advanced-stage Treatment | 1-Line          | Phase III            | Nonrandomized | None         | ≥3 arms | EFS                          |
| 169 | Imatinib       | Po             | small molecule      | Targeted agents     | Import         | No                   | Indicated for the treatment of relapsed or refractory Philadelphia chromosome-positive acute lymphoblastic leukemia (Ph+ ALL) in adult patients                                                                                                                                                               | LEUK                          | Hematoma    | Yes       | Combination    | Yes        | not available               | not available        | not available             | Advanced-stage Treatment | 2-Line & 3-Line | Phase II             | not available | None         | ≥3 arms | Hematologic response         |
| 170 | Imatinib       | Po             | small molecule      | Targeted agents     | Import         | No                   | Indicated for the treatment of adult patients with hypereosinophilic syndrome (HES) and/or chronic eosinophilic leukemia (CEL) with FIP1L1-PDGFRα fusion kinase                                                                                                                                               | LEUK                          | Hematoma    | Yes       | Combination    | Yes        | not available               | not available        | not available             | Advanced-stage Treatment | 1-Line          | Phase II             | Nonrandomized | None         | 1 arm   | activity with tumor response |
| 171 | Imatinib       | Po             | small molecule      | Targeted agents     | Import         | No                   | Indicated for the treatment of adult patients with myelodysplastic syndromes/myeloproliferative diseases (MDS/MPD) associated with platelet-derived growth factor receptor (PDGFR) gene rearrangements                                                                                                        | LEUK                          | Hematoma    | Yes       | Combination    | Yes        | not available               | not available        | not available             | Advanced-stage Treatment | 1-Line          | Phase II             | Nonrandomized | None         | 1 arm   | activity with tumor response |
| 172 | Imatinib       | Po             | small molecule      | Targeted agents     | Import         | No                   | Indicated for the treatment of adult patients with aggressive systemic mastocytosis (ASM) without D816V c-Kit gene mutation or with unknown c-Kit gene mutation                                                                                                                                               | LEUK                          | Hematoma    | Yes       | Combination    | Yes        | not available               | not available        | not available             | Advanced-stage Treatment | 2-Line          | Phase II             | Nonrandomized | None         | 1 arm   | activity with tumor response |
| 173 | Imatinib       | Po             | small molecule      | Targeted agents     | Import         | No                   | Indicated for the treatment of unresectable, recurrent, or metastatic dermatofibrosarcoma protuberans (DFSP)                                                                                                                                                                                                  | BSTT                          | Solid       | No        | Combination    | Yes        | 2010                        | not available        | not available             | Advanced-stage Treatment | 1-Line          | Phase II             | Nonrandomized | None         | 1 arm   | activity with tumor response |
| 174 | Imatinib       | Po             | small molecule      | Targeted agents     | Import         | No                   | Indicated for adjuvant treatment of adult patients with Kit (CD117)-positive GIST who have a significant risk of recurrence after surgical resection. Patients with very low and low recurrence risk should not receive this adjuvant treatment                                                               | GC                            | Solid       | Yes       | Combination    | Yes        | not available               | not available        | NCT00041197               | Adjuvant Therapy         | /               | Phase III            | Randomized    | Double-blind | 2 arms  | RFS                          |
| 175 | Sunitinib      | Po             | small molecule      | Targeted agents     | Import         | No                   | For advanced renal cell carcinoma (RCC) that cannot be treated with surgery                                                                                                                                                                                                                                   | RCC                           | Solid       | No        | Combination    | Yes        | 2007                        | not available        | NCT00083889               | Advanced-stage Treatment | 1-Line          | Phase III            | Randomized    | None         | 2 arms  | PFS                          |
| 176 | Sunitinib      | Po             | small molecule      | Targeted agents     | Import         | No                   | Indicated for gastrointestinal stromal tumors (GIST) in patients who have failed or are intolerant to imatinib mesylate treatment                                                                                                                                                                             | GC                            | Solid       | No        | Combination    | Yes        | 2007                        | not available        | NCT00075218               | Advanced-stage Treatment | 2-Line          | Phase III            | Randomized    | Double-blind | 2 arms  | TTP                          |
| 177 | Sunitinib      | Po             | small molecule      | Targeted agents     | Import         | No                   | Indicated for adult patients with unresectable, metastatic, well-differentiated, advanced pancreatic neuroendocrine tumors (pNET)                                                                                                                                                                             | NET                           | Solid       | No        | Combination    | Yes        | 2013                        | not available        | NCT00428597               | Advanced-stage Treatment | 2-Line          | Phase III            | Randomized    | Double-blind | 2 arms  | PFS                          |
| 178 | Cetuximab      | Iv             | monoclonal antibody | Targeted agents     | Import         | No                   | For RAS wild-type metastatic colorectal cancer: combined with FOLFOX or FOLFIRI for first-line treatment, and with irinotecan after irinotecan-based therapy failure                                                                                                                                          | CRC                           | Solid       | Yes       | Combination    | Yes        | 2019                        | Standard approval    | NCT01228734               | Advanced-stage Treatment | All Line        | Phase III            | Randomized    | None         | 2 arms  | PFS                          |
| 179 | Cetuximab      | Iv             | monoclonal antibody | Targeted agents     | Import         | No                   | Cetuximab combined with platinum-based chemotherapy and fluoropyrimidine is indicated for first-line treatment of recurrent and/or metastatic head and neck squamous cell carcinoma                                                                                                                           | SCCHN                         | Solid       | No        | Combination    | Yes        | 2020                        | Priority approval    | NCT00122460               | Advanced-stage Treatment | 1-Line          | Phase III            | Randomized    | None         | 2 arms  | OS                           |
| 180 | Cetuximab      | Iv             | monoclonal antibody | Targeted agents     | Import         | No                   | Indicated for the treatment of head and neck squamous cell carcinoma: in combination with radiation therapy for locally advanced disease                                                                                                                                                                      | SCCHN                         | Solid       | No        | Combination    | Yes        | 2022                        | Standard approval    | NCT00004227               | Adjuvant Therapy         | /               | Phase III            | Randomized    | None         | 2 arms  | Disease control duration     |
| 181 | Pucotenlimab   | Iv             | monoclonal antibody | Immune regulators   | Domestic       | Yes                  | For unresectable or metastatic MSI-H or dMMR advanced solid tumors: including advanced colorectal cancer patients with progression after fluoropyrimidines, oxaliplatin, and irinotecan, and other advanced solid tumors with progression after at least one prior treatment and no satisfactory alternatives | MSI-H/dMMR                    | Solid       | Yes       | Combination    | No         | 2022                        | Conditional approval | NCT03704246               | Advanced-stage Treatment | ≥3-Line         | Phase II             | Nonrandomized | None         | 1 arm   | ORR                          |
| 182 | Pucotenlimab   | Iv             | monoclonal antibody | Immune regulators   | Domestic       | Yes                  | Indicated for unresectable or metastatic melanoma patients who have failed prior systemic therapy                                                                                                                                                                                                             | MEL                           | Solid       | No        | Combination    | No         | 2022                        | Conditional approval | NCT04749485               | Advanced-stage Treatment | 2-Line          | Phase II             | Nonrandomized | None         | 1 arm   | ORR                          |
| 183 | Nilotinib      | Po             | small molecule      | Targeted agents     | Import         | No                   | Indicated for adult patients with chronic or accelerated phase Philadelphia chromosome-positive chronic myelogenous leukemia (Ph+ CML) who are resistant or intolerant to prior treatment, including imatinib                                                                                                 | LEUK                          | Hematoma    | No        | Combination    | Yes        | 2009                        | not available        | NCT00109707               | Advanced-stage Treatment | 2-Line          | Phase II             | Nonrandomized | None         | 2 arms  | CML-CP; MCR;                 |
| 184 | Nilotinib      | Po             | small molecule      | Targeted agents     | Import         | No                   | Indicated for adult patients with newly diagnosed chronic phase Philadelphia chromosome-positive chronic myelogenous leukemia (Ph+ CML)                                                                                                                                                                       | LEUK                          | Hematoma    | No        | Combination    | Yes        | 2016                        | not available        | NCT00471497               | Advanced-stage Treatment | 1-Line          | Phase III            | Randomized    | None         | ≥3 arms | MMR                          |
| 185 | Nilotinib      | Po             | small molecule      | Targeted agents     | Import         | No                   | Indicated for the treatment of chronic myelogenous leukemia in children aged 2 years and older                                                                                                                                                                                                                | LEUK                          | Hematoma    | No        | Combination    | Yes        | 2019                        | not available        | NCT01844765               | Advanced-stage Treatment | 1-Line & 2-Line | Phase II             | Nonrandomized | None         | 2 arms  | MMR                          |
| 186 | Olverembatinib | Po             | small molecule      | Targeted agents     | Domestic       | Yes                  | Indicated for adult patients with chronic or accelerated phase chronic myelogenous leukemia (CML) who are resistant to any tyrosine kinase inhibitor and diagnosed with T315I mutation using a validated testing method                                                                                       | LEUK                          | Hematoma    | Yes       | Combination    | Yes        | 2021                        | Conditional approval | NCT03883087 & NCT03883100 | Advanced-stage Treatment | All Line        | Phase II             | Nonrandomized | None         | 1 arm   | MaHR                         |

| No. | Generic name   | Delivery route | Product type   | Mechanism of action | Origin country | Exclusive production | Indication                                                                                                                                                                                                                                                               | Classification of Indications | Cancer type | Biomarker | Treatment type | Reimbursed | Year of indication approval | Approval type         | Clinical trial | Phase of treatment       | Line            | Clinical trial phase | Allocation    | Masking      | Arms    | Primary Outcome |
|-----|----------------|----------------|----------------|---------------------|----------------|----------------------|--------------------------------------------------------------------------------------------------------------------------------------------------------------------------------------------------------------------------------------------------------------------------|-------------------------------|-------------|-----------|----------------|------------|-----------------------------|-----------------------|----------------|--------------------------|-----------------|----------------------|---------------|--------------|---------|-----------------|
| 187 | Olverembatinib | Po             | small molecule | Targeted agents     | Domestic       | Yes                  | Indicated for adult patients with chronic phase chronic myelogenous leukemia (CML) who are resistant to and/or intolerant of first- and second-generation tyrosine kinase inhibitors                                                                                     | LEUK                          | Hematoma    | No        | Combination    | Yes        | 2023                        | Breakthrough approval | NCT04126681    | Advanced-stage Treatment | ≥3-Line         | Phase II             | Randomized    | None         | 2 arms  | EFS             |
| 188 | Ibrutinib      | Po             | small molecule | Targeted agents     | Import         | No                   | Indicated as monotherapy for the treatment of patients with mantle cell lymphoma who have received at least one prior therapy                                                                                                                                            | NHL                           | Hematoma    | No        | Combination    | Yes        | 2017                        | Priority approval     | NCT01646021    | Advanced-stage Treatment | 2-Line          | Phase III            | Randomized    | None         | 2 arms  | PFS             |
| 189 | Ibrutinib      | Po             | small molecule | Targeted agents     | Import         | No                   | Indicated as monotherapy for the treatment of treatment-naïve and relapsed chronic lymphocytic leukemia/small lymphocytic lymphoma (CLL/SLL) patients                                                                                                                    | NHL                           | Hematoma    | No        | Combination    | Yes        | 2017                        | Priority approval     | NCT01578707    | Advanced-stage Treatment | 1-Line & 2-Line | Phase III            | Randomized    | None         | 2 arms  | PFS             |
| 190 | Ibrutinib      | Po             | small molecule | Targeted agents     | Import         | No                   | Indicated as monotherapy for the treatment of Waldenström's macroglobulinemia patients who have received at least one prior therapy, or as first-line treatment for patients with Waldenström's macroglobulinemia who are not suitable for chemotherapy or immunotherapy | WM                            | Hematoma    | No        | Combination    | Yes        | 2018                        | not available         | NCT01614821    | Advanced-stage Treatment | 1-Line & 2-Line | Phase II             | Nonrandomized | None         | 1 arm   | ORR             |
| 191 | Ibrutinib      | Po             | small molecule | Targeted agents     | Import         | No                   | Ibrutinib combined with rituximab is indicated for the treatment of patients with Waldenström's macroglobulinemia                                                                                                                                                        | WM                            | Hematoma    | No        | Combination    | Yes        | 2018                        | not available         | NCT02165397    | Advanced-stage Treatment | 1-Line          | Phase III            | Randomized    | Double-blind | 2 arms  | PFS             |
| 192 | Zanubrutinib   | Po             | small molecule | Targeted agents     | Domestic       | Yes                  | Indicated for adult patients with mantle cell lymphoma (MCL) who have received at least one prior therapy                                                                                                                                                                | NHL                           | Hematoma    | No        | Combination    | Yes        | 2020                        | Special approval      | NCT03206970    | Advanced-stage Treatment | 2-Line          | Phase II             | Nonrandomized | None         | 1 arm   | ORR             |
| 193 | Zanubrutinib   | Po             | small molecule | Targeted agents     | Domestic       | Yes                  | Indicated for adult patients with chronic lymphocytic leukemia (CLL) or small lymphocytic lymphoma (SLL) who have received at least one prior therapy                                                                                                                    | NHL                           | Hematoma    | No        | Combination    | Yes        | 2020                        | Special approval      | NCT03206918    | Advanced-stage Treatment | 2-Line          | Phase II             | Nonrandomized | None         | 1 arm   | ORR             |
| 194 | Zanubrutinib   | Po             | small molecule | Targeted agents     | Domestic       | Yes                  | Indicated for adult patients with Waldenström's macroglobulinemia (WM) who have received at least one prior therapy                                                                                                                                                      | WM                            | Hematoma    | No        | Combination    | Yes        | 2021                        | Conditional approval  | NCT03332173    | Advanced-stage Treatment | 2-Line          | Phase II             | Nonrandomized | None         | 1 arm   | ORR             |
| 195 | Zanubrutinib   | Po             | small molecule | Targeted agents     | Domestic       | Yes                  | Indicated as monotherapy for treatment-naïve adult patients with chronic lymphocytic leukemia (CLL) or small lymphocytic lymphoma (SLL)                                                                                                                                  | NHL                           | Hematoma    | No        | Combination    | Yes        | 2023                        | Standard approval     | NCT03336333    | Advanced-stage Treatment | 1-Line          | Phase III            | Randomized    | None         | 2 arms  | PFS             |
| 196 | Orelabrutinib  | Po             | small molecule | Immune regulators   | Domestic       | No                   | Indicated for adult patients with mantle cell lymphoma (MCL) who have received at least one prior therapy                                                                                                                                                                | NHL                           | Hematoma    | No        | Combination    | Yes        | 2020                        | Conditional approval  | NCT03494179    | Advanced-stage Treatment | 2-Line          | Phase II             | Randomized    | None         | 2 arms  | ORR             |
| 197 | Orelabrutinib  | Po             | small molecule | Immune regulators   | Domestic       | No                   | Indicated for adult patients with chronic lymphocytic leukemia (CLL) or small lymphocytic lymphoma (SLL) who have received at least one prior therapy                                                                                                                    | NHL                           | Hematoma    | No        | Combination    | Yes        | 2020                        | Conditional approval  | NCT03493217    | Advanced-stage Treatment | 2-Line          | Phase II             | Nonrandomized | None         | 1 arm   | ORR             |
| 198 | Orelabrutinib  | Po             | small molecule | Immune regulators   | Domestic       | No                   | Indicated for adult patients with marginal zone lymphoma (MZL) who have received at least one prior therapy                                                                                                                                                              | NHL                           | Hematoma    | No        | Combination    | Yes        | 2023                        | Conditional approval  | NCT03797456    | Advanced-stage Treatment | 2-Line          | Phase II             | Nonrandomized | None         | 1 arm   | ORR             |
| 199 | Bortezomib     | Iv             | small molecule | Targeted agents     | Import         | No                   | Bortezomib + melphalan + prednisone (MP regimen) for untreated multiple myeloma patients ineligible for high-dose chemotherapy and stem cell transplantation                                                                                                             | MM                            | Hematoma    | No        | Combination    | Yes        | 2005                        | not available         | NCT00048230    | Advanced-stage Treatment | 1-Line          | Phase III            | Randomized    | None         | 2 arms  | TTP             |
| 200 | Bortezomib     | Iv             | small molecule | Targeted agents     | Import         | No                   | Indicated for the treatment of relapsed multiple myeloma patients who have received at least one prior therapy                                                                                                                                                           | MM                            | Hematoma    | No        | Combination    | Yes        | 2005                        | not available         | NCT00111319    | Advanced-stage Treatment | 2-Line          | Phase III            | Randomized    | None         | 2 arms  | TTP             |
| 201 | Bortezomib     | Iv             | small molecule | Targeted agents     | Import         | No                   | Indicated for the treatment of relapsed or refractory mantle cell lymphoma (MCL) patients who have received at least one prior therapy                                                                                                                                   | NHL                           | Hematoma    | No        | Combination    | Yes        | 2009                        | not available         | NCT00063713    | Advanced-stage Treatment | 2-Line          | Phase II             | Nonrandomized | None         | 1 arm   | ORR             |
| 202 | Bortezomib     | Iv             | small molecule | Targeted agents     | Import         | No                   | Bortezomib, in combination with rituximab, cyclophosphamide, doxorubicin, and prednisone, is indicated for the treatment of previously untreated adult patients with mantle cell lymphoma (MCL) who are not candidates for hematopoietic stem cell transplantation       | NHL                           | Hematoma    | No        | Combination    | Yes        | 2018                        | not available         | NCT00722137    | Advanced-stage Treatment | 1-Line          | Phase III            | Randomized    | None         | 2 arms  | PFS             |
| 203 | Lenalidomide   | Po             | small molecule | Immune regulators   | Import         | No                   | Lenalidomide in combination with dexamethasone is indicated for the treatment of adult patients with multiple myeloma who have received at least one prior therapy                                                                                                       | MM                            | Hematoma    | No        | Combination    | Yes        | 2013                        | not available         | NCT00056160    | Advanced-stage Treatment | 2-Line          | Phase III            | Randomized    | Double-blind | 2 arms  | TTP             |
| 204 | Lenalidomide   | Po             | small molecule | Immune regulators   | Import         | No                   | Lenalidomide in combination with dexamethasone is indicated for the treatment of adult patients with multiple myeloma who have not received prior treatment and are not candidates for transplantation                                                                   | MM                            | Hematoma    | No        | Combination    | Yes        | 2017                        | Special approval      | NCT00689936    | Advanced-stage Treatment | 1-Line          | Phase III            | Randomized    | None         | ≥3 arms | PFS             |
| 205 | Lenalidomide   | Po             | small molecule | Immune regulators   | Import         | No                   | Lenalidomide in combination with rituximab is indicated for the treatment of adult patients with follicular lymphoma grades 1–3a who have received prior treatment                                                                                                       | NHL                           | Hematoma    | No        | Combination    | Yes        | 2020                        | Priority approval     | NCT01938001    | Advanced-stage Treatment | 2-Line          | Phase III            | Randomized    | Double-blind | 2 arms  | PFS-KM          |

| No. | Generic name        | Delivery route | Product type        | Mechanism of action | Origin country | Exclusive production | Indication                                                                                                                                                                                                                                                                                                                                                            | Classification of Indications | Cancer type | Biomarker | Treatment type | Reimbursed | Year of indication approval | Approval type        | Clinical trial | Phase of treatment       | Line            | Clinical trial phase | Allocation    | Masking      | Arms   | Primary Outcome       |
|-----|---------------------|----------------|---------------------|---------------------|----------------|----------------------|-----------------------------------------------------------------------------------------------------------------------------------------------------------------------------------------------------------------------------------------------------------------------------------------------------------------------------------------------------------------------|-------------------------------|-------------|-----------|----------------|------------|-----------------------------|----------------------|----------------|--------------------------|-----------------|----------------------|---------------|--------------|--------|-----------------------|
| 206 | Daratumumab         | Iv             | monoclonal antibody | Targeted agents     | Import         | Yes                  | Monotherapy is indicated for the treatment of adult patients with relapsed or refractory multiple myeloma who have previously received treatment including proteasome inhibitors and immunomodulatory agents, with disease progression at the last treatment                                                                                                          | MM                            | Hematoma    | No        | Combination    | Yes        | 2019                        | Special approval     | NCT01985126    | Advanced-stage Treatment | ≥3-Line         | Phase II             | Randomized    | None         | 1 arm  | Overall Response      |
| 207 | Daratumumab         | Iv             | monoclonal antibody | Targeted agents     | Import         | Yes                  | Daratumumab combined with lenalidomide and dexamethasone, or with bortezomib and dexamethasone, is indicated for the treatment of adult patients with multiple myeloma who have previously received at least one line of therapy                                                                                                                                      | MM                            | Hematoma    | No        | Combination    | Yes        | 2021                        | Priority approval    | NCT02136134    | Advanced-stage Treatment | 2-Line          | Phase III            | Randomized    | None         | 2 arms | PFS                   |
| 208 | Daratumumab         | Iv             | monoclonal antibody | Targeted agents     | Import         | Yes                  | Daratumumab combined with lenalidomide and dexamethasone, or with bortezomib, melphalan, and prednisone, is indicated for the treatment of newly diagnosed multiple myeloma adult patients who are not candidates for autologous stem cell transplantation                                                                                                            | MM                            | Hematoma    | No        | Combination    | Yes        | 2021                        | Standard approval    | NCT02195479    | Advanced-stage Treatment | 1-Line          | Phase III            | Randomized    | None         | 2 arms | PFS                   |
| 209 | Blinatumomab        | Iv             | monoclonal antibody | Targeted agents     | Import         | Yes                  | Indicated for the treatment of adult patients with relapsed or refractory precursor B-cell acute lymphoblastic leukemia                                                                                                                                                                                                                                               | LEUK                          | Hematoma    | No        | Combination    | No         | 2020                        | Conditional approval | NCT02013167    | Advanced-stage Treatment | 2-Line          | Phase III            | Randomized    | None         | 2 arms | OS                    |
| 210 | Blinatumomab        | Iv             | monoclonal antibody | Targeted agents     | Import         | Yes                  | Indicated for the treatment of pediatric patients with relapsed or refractory CD19-positive precursor B-cell acute lymphoblastic leukemia                                                                                                                                                                                                                             | LEUK                          | Hematoma    | Yes       | Combination    | No         | 2022                        | Conditional approval | NCT02393859    | Advanced-stage Treatment | 2-Line          | Phase III            | Randomized    | None         | 2 arms | EFS                   |
| 211 | Zimberelimab        | Iv             | monoclonal antibody | Immune regulators   | Domestic       | Yes                  | Indicated for adult patients with relapsed or refractory classic Hodgkin lymphoma who have received at least two lines of systemic chemotherapy                                                                                                                                                                                                                       | HL                            | Hematoma    | No        | Combination    | Yes        | 2021                        | Conditional approval | NCT03655483    | Advanced-stage Treatment | ≥3-Line         | Phase II             | Nonrandomized | None         | 1 arm  | ORR                   |
| 212 | Zimberelimab        | Iv             | monoclonal antibody | Immune regulators   | Domestic       | Yes                  | Indicated for patients with relapsed or metastatic cervical cancer who have failed platinum-based chemotherapy and are PD-L1 positive (CPS≥1)                                                                                                                                                                                                                         | CC                            | Solid       | Yes       | Combination    | Yes        | 2023                        | Conditional approval | NCT03972722    | Advanced-stage Treatment | 2-Line          | Phase II             | Nonrandomized | None         | 1 arm  | ORR                   |
| 213 | Rituximab           | Iv             | monoclonal antibody | Targeted agents     | Import         | No                   | Indicated for previously untreated CD20-positive stage III-IV follicular non-Hodgkin lymphoma patients, to be used in combination with chemotherapy                                                                                                                                                                                                                   | NHL                           | Hematoma    | Yes       | Combination    | Yes        | 2000                        | not available        | NCT00140582    | Advanced-stage Treatment | 1-Line          | Phase III            | Randomized    | None         | 2 arms | PFS                   |
| 214 | Rituximab           | Iv             | monoclonal antibody | Targeted agents     | Import         | No                   | Indicated for the treatment of relapsed or chemotherapy-resistant follicular lymphoma                                                                                                                                                                                                                                                                                 | NHL                           | Hematoma    | No        | Combination    | Yes        | 2000                        | not available        | NCT00004179    | Advanced-stage Treatment | 1-Line          | Phase III            | Randomized    | None         | 2 arms | Response to treatment |
| 215 | Rituximab           | Iv             | monoclonal antibody | Targeted agents     | Import         | No                   | CD20-positive diffuse large B-cell lymphoma (DLBCL) should be treated in combination with standard CHOP chemotherapy (cyclophosphamide, doxorubicin, vincristine, and prednisone) for 8 cycles                                                                                                                                                                        | NHL                           | Hematoma    | Yes       | Combination    | Yes        | 2000                        | not available        | NCT00499018    | Advanced-stage Treatment | 1-Line          | Phase III            | Randomized    | None         | 2 arms | DFS                   |
| 216 | Rituximab           | Iv             | monoclonal antibody | Targeted agents     | Import         | No                   | Monotherapy is used for maintenance treatment of follicular lymphoma patients who have achieved complete or partial remission after rituximab combined with chemotherapy                                                                                                                                                                                              | NHL                           | Hematoma    | No        | Combination    | Yes        | 2019                        | Standard approval    | NCT00140582    | Advanced-stage Treatment | 1-Line          | Phase III            | Randomized    | None         | 2 arms | PFS                   |
| 217 | Rituximab           | Iv             | monoclonal antibody | Targeted agents     | Import         | No                   | Rituximab combined with fludarabine and cyclophosphamide (FC) is used for the treatment of previously untreated or relapsed/refractory chronic lymphocytic leukemia (CLL) patients                                                                                                                                                                                    | LEUK                          | Hematoma    | No        | Combination    | Yes        | 2019                        | Standard approval    | NCT00281918    | Advanced-stage Treatment | 1-Line & 2-Line | Phase III            | Randomized    | None         | 2 arms | PFS                   |
| 218 | Polatuzumab Vedotin | Iv             | ADC                 | Targeted agents     | Import         | Yes                  | Polatuzumab Vedotin combined with rituximab, cyclophosphamide, doxorubicin, and prednisone is indicated for the treatment of previously untreated adult patients with diffuse large B-cell lymphoma (DLBCL)                                                                                                                                                           | NHL                           | Hematoma    | No        | Combination    | Yes        | 2023                        | Standard approval    | NCT03274492    | Advanced-stage Treatment | 1-Line          | Phase III            | Randomized    | Double-blind | 2 arms | PFS                   |
| 219 | Polatuzumab Vedotin | Iv             | ADC                 | Targeted agents     | Import         | Yes                  | Polatuzumab Vedotin combined with bendamustine and rituximab is indicated for the treatment of adult patients with relapsed or refractory diffuse large B-cell lymphoma (DLBCL) who are not eligible for hematopoietic stem cell transplantation. Conditional approval was based on complete response rates and duration of response for relapsed or refractory DLBCL | NHL                           | Hematoma    | No        | Combination    | Yes        | 2023                        | Conditional approval | NCT02257567    | Advanced-stage Treatment | 2-Line          | Phase II             | Randomized    | None         | 2 arms | ORR                   |
| 220 | Brentuximab Vedotin | Iv             | ADC                 | Targeted agents     | Import         | Yes                  | Indicated for the treatment of adult patients with CD30-positive lymphoma: relapsed or refractory systemic anaplastic large cell lymphoma (sALCL)                                                                                                                                                                                                                     | NHL                           | Hematoma    | No        | Combination    | Yes        | 2020                        | Priority approval    | NCT00866047    | Advanced-stage Treatment | 2-Line          | Phase II             | Nonrandomized | None         | 1 arm  | ORR                   |
| 221 | Brentuximab Vedotin | Iv             | ADC                 | Targeted agents     | Import         | Yes                  | Indicated for the treatment of adult patients with CD30-positive lymphoma: relapsed or refractory classical Hodgkin lymphoma (cHL)                                                                                                                                                                                                                                    | HL                            | Hematoma    | No        | Combination    | Yes        | 2020                        | Priority approval    | NCT00848926    | Advanced-stage Treatment | 2-Line          | Phase II             | Nonrandomized | None         | 1 arm  | ORR                   |
| 222 | Brentuximab Vedotin | Iv             | ADC                 | Targeted agents     | Import         | Yes                  | Indicated for adult patients with CD30-positive primary cutaneous anaplastic large cell lymphoma (pcALCL) or mycosis fungoides (MF) who have previously received systemic therapy                                                                                                                                                                                     | NHL                           | Hematoma    | Yes       | Combination    | Yes        | 2021                        | Standard approval    | NCT01578499    | Advanced-stage Treatment | 2-Line          | Phase III            | Randomized    | None         | 2 arms | ORR                   |
| 223 | Chidamide           | Po             | small molecule      | Targeted agents     | Domestic       | Yes                  | Indicated for adult patients with relapsed or refractory peripheral T-cell lymphoma (PTCL) who have received at least one prior systemic chemotherapy                                                                                                                                                                                                                 | NHL                           | Hematoma    | No        | Combination    | Yes        | 2014                        | Special approval     | NCT05833724    | Advanced-stage Treatment | 2-Line          | Phase II             | Nonrandomized | None         | 1 arm  | ORR                   |

| No. | Generic name          | Delivery route | Product type   | Mechanism of action | Origin country | Exclusive production | Indication                                                                                                                                                                                                                                                                                                                                                                                                                                                               | Classification of Indications | Cancer type | Biomarker | Treatment type | Reimbursed | Year of indication approval | Approval type        | Clinical trial | Phase of treatment       | Line    | Clinical trial phase | Allocation | Masking      | Arms   | Primary Outcome |
|-----|-----------------------|----------------|----------------|---------------------|----------------|----------------------|--------------------------------------------------------------------------------------------------------------------------------------------------------------------------------------------------------------------------------------------------------------------------------------------------------------------------------------------------------------------------------------------------------------------------------------------------------------------------|-------------------------------|-------------|-----------|----------------|------------|-----------------------------|----------------------|----------------|--------------------------|---------|----------------------|------------|--------------|--------|-----------------|
| 224 | Chidamide             | Po             | small molecule | Targeted agents     | Domestic       | Yes                  | Chidamide + aromatase inhibitors is indicated for postmenopausal HR-positive, HER2-negative locally advanced or metastatic breast cancer patients with recurrence or progression after endocrine therapy                                                                                                                                                                                                                                                                 | BC                            | Solid       | Yes       | Combination    | No         | 2019                        | Priority approval    | NCT02482753    | Advanced-stage Treatment | ≥3-Line | Phase III            | Randomized | Double-blind | 2 arms | PFS             |
| 225 | Abiraterone           | Po             | small molecule | Targeted agents     | Import         | No                   | Abiraterone, in combination with prednisone or prednisolone, is indicated for the treatment of metastatic castration-resistant prostate cancer (mCRPC)                                                                                                                                                                                                                                                                                                                   | PCa                           | Solid       | No        | Combination    | Yes        | 2015                        | Standard approval    | NCT00638690    | Advanced-stage Treatment | 1-Line  | Phase III            | Randomized | Double-blind | 2 arms | OS              |
| 226 | Abiraterone           | Po             | small molecule | Targeted agents     | Import         | No                   | Abiraterone acetate, in combination with prednisone or prednisolone, is indicated for the treatment of newly diagnosed high-risk metastatic endocrine-sensitive prostate cancer, including patients who have not received endocrine therapy or have received endocrine therapy for no more than 3 months                                                                                                                                                                 | PCa                           | Solid       | No        | Combination    | Yes        | 2018                        | Priority approval    | NCT01715285    | Advanced-stage Treatment | 1-Line  | Phase III            | Randomized | Double-blind | 2 arms | OS              |
| 227 | Apalutamide           | Po             | small molecule | Targeted agents     | Import         | No                   | Indicated for the treatment of adult patients with high-risk non-metastatic castration-resistant prostate cancer (NM-CRPC)                                                                                                                                                                                                                                                                                                                                               | PCa                           | Solid       | No        | Combination    | Yes        | 2019                        | Priority approval    | NCT01946204    | Advanced-stage Treatment | 1-Line  | Phase III            | Randomized | Double-blind | 2 arms | MFS             |
| 228 | Apalutamide           | Po             | small molecule | Targeted agents     | Import         | No                   | Indicated for the treatment of adult patients with metastatic hormone-sensitive prostate cancer (mHSPC)                                                                                                                                                                                                                                                                                                                                                                  | PCa                           | Solid       | No        | Combination    | Yes        | 2020                        | Priority approval    | NCT02489318    | Advanced-stage Treatment | 1-Line  | Phase III            | Randomized | Double-blind | 2 arms | OS              |
| 229 | Enzalutamide          | Po             | small molecule | Targeted agents     | Import         | No                   | Indicated for the treatment of adult patients with metastatic castration-resistant prostate cancer (mCRPC) who are asymptomatic or mildly symptomatic and have not received chemotherapy after failure of androgen deprivation therapy                                                                                                                                                                                                                                   | PCa                           | Solid       | No        | Combination    | Yes        | 2019                        | Priority approval    | NCT01212991    | Advanced-stage Treatment | 2-Line  | Phase III            | Randomized | Double-blind | 2 arms | OS              |
| 230 | Enzalutamide          | Po             | small molecule | Targeted agents     | Import         | No                   | Indicated for adult patients with non-metastatic castration-resistant prostate cancer (NM-CRPC) at high risk of metastasis                                                                                                                                                                                                                                                                                                                                               | PCa                           | Solid       | No        | Combination    | Yes        | 2020                        | Priority approval    | NCT02003924    | Advanced-stage Treatment | 2-Line  | Phase III            | Randomized | Double-blind | 2 arms | MFS             |
| 231 | Enzalutamide          | Po             | small molecule | Targeted agents     | Import         | No                   | Indicated for metastatic hormone-sensitive prostate cancer (mHSPC)                                                                                                                                                                                                                                                                                                                                                                                                       | PCa                           | Solid       | No        | Combination    | Yes        | 2024                        | Standard approval    | NCT02677896    | Advanced-stage Treatment | 1-Line  | Phase III            | Randomized | Double-blind | 2 arms | rPFS            |
| 232 | Darolutamide          | Po             | small molecule | Targeted agents     | Import         | Yes                  | Indicated for the treatment of adult patients with high-risk non-metastatic castration-resistant prostate cancer (NM-CRPC)                                                                                                                                                                                                                                                                                                                                               | PCa                           | Solid       | No        | Combination    | Yes        | 2021                        | Priority approval    | NCT02200614    | Advanced-stage Treatment | 2-Line  | Phase III            | Randomized | Double-blind | 2 arms | MFS             |
| 233 | Darolutamide          | Po             | small molecule | Targeted agents     | Import         | Yes                  | Darolutamide in combination with docetaxel is indicated for the treatment of adult patients with metastatic hormone-sensitive prostate cancer (mHSPC)                                                                                                                                                                                                                                                                                                                    | PCa                           | Solid       | No        | Combination    | Yes        | 2023                        | Standard approval    | NCT02799602    | Advanced-stage Treatment | 1-Line  | Phase III            | Randomized | Double-blind | 2 arms | OS              |
| 234 | Olaparib              | Po             | small molecule | Targeted agents     | Import         | No                   | Monotherapy is indicated for the maintenance treatment of adult patients with platinum-sensitive recurrent epithelial ovarian cancer, fallopian tube cancer, or primary peritoneal cancer who have achieved complete or partial response after platinum-based chemotherapy                                                                                                                                                                                               | OC&TC&PC                      | Solid       | No        | Combination    | Yes        | 2018                        | Special approval     | NCT01874353    | Advanced-stage Treatment | 2-Line  | Phase III            | Randomized | Double-blind | 2 arms | PFS             |
| 235 | Olaparib              | Po             | small molecule | Targeted agents     | Import         | No                   | Indicated for the maintenance treatment of adult patients with germline or somatic BRCA-mutated advanced epithelial ovarian cancer, fallopian tube cancer, or primary peritoneal cancer who have achieved complete or partial response after first-line platinum-based chemotherapy                                                                                                                                                                                      | OC&TC&PC                      | Solid       | Yes       | Combination    | Yes        | 2019                        | Priority approval    | NCT01844986    | Advanced-stage Treatment | 2-Line  | Phase III            | Randomized | Double-blind | 2 arms | PFS             |
| 236 | Olaparib              | Po             | small molecule | Targeted agents     | Import         | No                   | Indicated for the treatment of adult patients with metastatic castration-resistant prostate cancer (mCRPC) who carry germline or somatic BRCA mutations (gBRCAm or sBRCAm) and have previously failed treatment, including with a novel endocrine therapy                                                                                                                                                                                                                | PCa                           | Solid       | Yes       | Combination    | Yes        | 2021                        | Conditional approval | NCT02987543    | Advanced-stage Treatment | 2-Line  | Phase III            | Randomized | None         | 2 arms | rPFS            |
| 237 | Olaparib              | Po             | small molecule | Targeted agents     | Import         | No                   | Olaparib in combination with bevacizumab is indicated for the maintenance treatment of adult patients with advanced epithelial ovarian cancer, fallopian tube cancer, or primary peritoneal cancer who are homologous recombination repair-deficient (HRD-positive) and have achieved a complete or partial response to first-line platinum-based chemotherapy combined with bevacizumab                                                                                 | OC&TC&PC                      | Solid       | No        | Combination    | Yes        | 2022                        | Standard approval    | NCT02477644    | Advanced-stage Treatment | 2-Line  | Phase III            | Randomized | Double-blind | 2 arms | OS              |
| 238 | Trastuzumab Emtansine | Iv             | ADC            | Targeted agents     | Import         | Yes                  | Adjuvant treatment for breast cancer: Monotherapy is indicated for HER2-positive early breast cancer patients who have residual invasive disease after receiving neoadjuvant therapy with taxane combined with trastuzumab                                                                                                                                                                                                                                               | BC                            | Solid       | Yes       | Combination    | Yes        | 2020                        | Priority approval    | NCT01772472    | Adjuvant Therapy         | /       | Phase III            | Randomized | None         | 2 arms | IDFS            |
| 239 | Trastuzumab Emtansine | Iv             | ADC            | Targeted agents     | Import         | Yes                  | Metastatic breast cancer treatment: Monotherapy is indicated for HER2-positive, unresectable locally advanced or metastatic breast cancer patients who have received treatment with taxane and trastuzumab. The patient should meet one of the following conditions: previously received treatment for locally advanced or metastatic breast cancer, or experienced disease recurrence within 6 months after adjuvant treatment or during the course of adjuvant therapy | BC                            | Solid       | Yes       | Combination    | Yes        | 2021                        | Standard approval    | NCT00829166    | Advanced-stage Treatment | ≥3-Line | Phase III            | Randomized | None         | 2 arms | OS & PFS        |

| No. | Generic name           | Delivery route | Product type        | Mechanism of action | Origin country | Exclusive production | Indication                                                                                                                                                                                                                                                                                                                                                                | Classification of Indications | Cancer type | Biomarker | Treatment type | Reimbursed | Year of indication approval | Approval type        | Clinical trial | Phase of treatment       | Line    | Clinical trial phase | Allocation    | Masking      | Arms   | Primary Outcome |
|-----|------------------------|----------------|---------------------|---------------------|----------------|----------------------|---------------------------------------------------------------------------------------------------------------------------------------------------------------------------------------------------------------------------------------------------------------------------------------------------------------------------------------------------------------------------|-------------------------------|-------------|-----------|----------------|------------|-----------------------------|----------------------|----------------|--------------------------|---------|----------------------|---------------|--------------|--------|-----------------|
| 240 | Pertuzumab             | Iv             | monoclonal antibody | Targeted agents     | Import         | No                   | Indicated for adjuvant treatment in HER2-positive early breast cancer patients with high recurrence risk, in combination with trastuzumab and chemotherapy                                                                                                                                                                                                                | BC                            | Solid       | Yes       | Combination    | Yes        | 2018                        | Standard approval    | NCT01358877    | Adjuvant Therapy         | /       | Phase III            | Randomized    | Double-blind | 2 arms | IDFS            |
| 241 | Pertuzumab             | Iv             | monoclonal antibody | Targeted agents     | Import         | No                   | Indicated for neoadjuvant treatment in HER2-positive, locally advanced, inflammatory, or early breast cancer patients (with tumors >2 cm or lymph node-positive), in combination with trastuzumab and chemotherapy, as part of the overall treatment plan for early breast cancer                                                                                         | BC                            | Solid       | Yes       | Combination    | Yes        | 2019                        | Priority approval    | NCT02586025    | Neoadjuvant Therapy      | /       | Phase III            | Randomized    | Double-blind | 2 arms | tpCR            |
| 242 | Pertuzumab             | Iv             | monoclonal antibody | Targeted agents     | Import         | No                   | Pertuzumab, in combination with trastuzumab and docetaxel, is indicated for HER2-positive patients with metastatic disease who have not previously received HER2-targeted treatment or chemotherapy for metastatic or unresectable locally recurrent breast cancer                                                                                                        | BC                            | Solid       | Yes       | Combination    | No         | 2019                        | Priority approval    | NCT00567190    | Advanced-stage Treatment | 1-Line  | Phase III            | Randomized    | Double-blind | 2 arms | PFS             |
| 243 | Trastuzumab Deruxtecan | Iv             | ADC                 | Targeted agents     | Import         | Yes                  | Monotherapy is indicated for the treatment of adult patients with unresectable or metastatic HER2-positive breast cancer who have previously received one or more HER2-targeted therapies                                                                                                                                                                                 | BC                            | Solid       | Yes       | Combination    | Yes        | 2023                        | Priority approval    | NCT03529110    | Advanced-stage Treatment | ≥3-Line | Phase III            | Randomized    | None         | 2 arms | PFS             |
| 244 | Trastuzumab Deruxtecan | Iv             | ADC                 | Targeted agents     | Import         | Yes                  | Monotherapy is indicated for the treatment of adult patients with unresectable or metastatic HER2-low (IHC1+ or IHC2+/ISH-) breast cancer who have previously received at least one systemic therapy during the metastatic disease phase, or who experienced disease recurrence within 6 months after adjuvant chemotherapy or during the course of adjuvant chemotherapy | BC                            | Solid       | Yes       | Combination    | Yes        | 2023                        | Standard approval    | NCT03734029    | Advanced-stage Treatment | 2-Line  | Phase III            | Randomized    | None         | 2 arms | PFS             |
| 245 | Pyrotinib              | Po             | small molecule      | Targeted agents     | Domestic       | Yes                  | Pyrotinib in combination with capecitabine is indicated for the treatment of HER2-positive, recurrent or metastatic breast cancer patients who have not received or have previously received trastuzumab. Prior to the use of pyrotinib, patients should have received anthracycline or taxane-based chemotherapy                                                         | BC                            | Solid       | Yes       | Combination    | Yes        | 2018                        | Special approval     | NCT02422199    | Advanced-stage Treatment | 2-Line  | Phase II             | Randomized    | None         | 2 arms | ORR             |
| 246 | Pyrotinib              | Po             | small molecule      | Targeted agents     | Domestic       | Yes                  | Pyrotinib in combination with trastuzumab and docetaxel is indicated for neoadjuvant treatment of HER2-positive early or locally advanced breast cancer patients                                                                                                                                                                                                          | BC                            | Solid       | Yes       | Combination    | Yes        | 2022                        | Conditional approval | NCT03588091    | Neoadjuvant Therapy      | /       | Phase III            | Randomized    | Double-blind | 2 arms | ORR             |
| 247 | Pyrotinib              | Po             | small molecule      | Targeted agents     | Domestic       | Yes                  | Pyrotinib in combination with trastuzumab and docetaxel is indicated for the treatment of HER2-positive, advanced-stage, recurrent or metastatic breast cancer patients who have not previously received anti-HER2 therapy                                                                                                                                                | BC                            | Solid       | Yes       | Combination    | Yes        | 2023                        | Priority approval    | NCT03863223    | Advanced-stage Treatment | 1-Line  | Phase III            | Randomized    | Double-blind | 2 arms | PFS             |
| 248 | Abemaciclib            | Po             | small molecule      | Targeted agents     | Import         | Yes                  | Abemaciclib in combination with aromatase inhibitors is indicated as initial endocrine therapy for postmenopausal HR-positive, HER2-negative, locally advanced or metastatic breast cancer patients                                                                                                                                                                       | BC                            | Solid       | Yes       | Combination    | Yes        | 2020                        | Priority approval    | NCT02246621    | Advanced-stage Treatment | 1-Line  | Phase III            | Randomized    | Double-blind | 2 arms | PFS             |
| 249 | Abemaciclib            | Po             | small molecule      | Targeted agents     | Import         | Yes                  | Abemaciclib in combination with fulvestrant is indicated for HR-positive, HER2-negative, locally advanced or metastatic breast cancer patients who have progressed after previous endocrine therapy                                                                                                                                                                       | BC                            | Solid       | Yes       | Combination    | Yes        | 2020                        | Priority approval    | NCT02107703    | Advanced-stage Treatment | 2-Line  | Phase III            | Randomized    | Double-blind | 2 arms | PFS             |
| 250 | Abemaciclib            | Po             | small molecule      | Targeted agents     | Import         | Yes                  | Abemaciclib in combination with endocrine therapy (tamoxifen or aromatase inhibitors) is indicated for adjuvant treatment of HR-positive, HER2-negative, lymph node-positive, high-risk early breast cancer adult patients with Ki-67 ≥ 20%                                                                                                                               | BC                            | Solid       | Yes       | Combination    | Yes        | 2021                        | Standard approval    | NCT03155997    | Adjuvant Therapy         | /       | Phase III            | Randomized    | None         | 2 arms | IDFS            |
| 251 | Dalpiciclib            | Po             | small molecule      | Targeted agents     | Domestic       | Yes                  | Dalpiciclib in combination with fulvestrant is indicated for patients who have experienced disease progression after prior endocrine therapy                                                                                                                                                                                                                              | BC                            | Solid       | No        | Combination    | Yes        | 2021                        | Priority approval    | NCT03927456    | Advanced-stage Treatment | 2-Line  | Phase III            | Randomized    | Double-blind | 2 arms | PFS             |
| 252 | Dalpiciclib            | Po             | small molecule      | Targeted agents     | Domestic       | Yes                  | Indicated for patients with hormone receptor (HR)-positive, HER2-negative locally advanced or metastatic breast cancer: to be used in combination with an aromatase inhibitor as initial endocrine therapy.                                                                                                                                                               | BC                            | Solid       | Yes       | Combination    | Yes        | 2023                        | Standard approval    | NCT03968998    | Advanced-stage Treatment | 1-Line  | Phase III            | Randomized    | Double-blind | 2 arms | PFS             |
| 253 | Ribociclib             | Po             | small molecule      | Targeted agents     | Import         | Yes                  | Indicated for use in combination with an aromatase inhibitor as initial endocrine therapy for premenopausal or perimenopausal women with hormone receptor (HR)-positive, HER2-negative locally advanced or metastatic breast cancer. When using endocrine therapy, it should be combined with a luteinizing hormone-releasing hormone (LHRH) agonist                      | BC                            | Solid       | Yes       | Combination    | Yes        | 2023                        | Standard approval    | NCT02278120    | Advanced-stage Treatment | 1-Line  | Phase III            | Randomized    | Double-blind | 2 arms | PFS             |
| 254 | Ribociclib             | Po             | small molecule      | Targeted agents     | Import         | Yes                  | Indicated for use in postmenopausal women with hormone receptor (HR)-positive, HER2-negative locally advanced or metastatic breast cancer, in combination with an aromatase inhibitor as initial endocrine therapy                                                                                                                                                        | BC                            | Solid       | Yes       | Combination    | Yes        | 2023                        | Standard approval    | NCT01958021    | Advanced-stage Treatment | 1-Line  | Phase III            | Randomized    | Double-blind | 2 arms | PFS             |
| 255 | Denosumab              | Iv             | monoclonal antibody | Immune regulators   | Import         | No                   | Indicated for the treatment of unresectable or surgically resectable bone giant cell tumors that could cause severe functional impairment, including adult patients and adolescents with skeletal maturity (defined as at least one mature long bone and body weight ≥ 45kg)                                                                                              | BSTT                          | Solid       | No        | Combination    | Yes        | 2019                        | Priority approval    | NCT00680992    | Advanced-stage Treatment | 1-Line  | Phase II             | Nonrandomized | None         | 1 arm  | ORR             |

| No. | Generic name | Delivery route | Product type        | Mechanism of action | Origin country | Exclusive production | Indication                                                                                                                                                                                                                                                 | Classification of Indications | Cancer type | Biomarker | Treatment type | Reimbursed | Year of indication approval | Approval type        | Clinical trial            | Phase of treatment       | Line    | Clinical trial phase | Allocation    | Masking      | Arms   | Primary Outcome       |
|-----|--------------|----------------|---------------------|---------------------|----------------|----------------------|------------------------------------------------------------------------------------------------------------------------------------------------------------------------------------------------------------------------------------------------------------|-------------------------------|-------------|-----------|----------------|------------|-----------------------------|----------------------|---------------------------|--------------------------|---------|----------------------|---------------|--------------|--------|-----------------------|
| 256 | Denosumab    | Iv             | monoclonal antibody | Immune regulators   | Import         | No                   | Indicated for the prevention of bone-related events in patients with bone metastases from solid tumors and in patients with multiple myeloma                                                                                                               | MM                            | Hematoma    | No        | Combination    | Yes        | 2020                        | Standard approval    | NCT00321464 & NCT01345019 | Adjuvant Therapy         | /       | Phase III            | Randomized    | Double-blind | 2 arms | noninferiority of SRE |
| 257 | Nimotuzumab  | Iv             | monoclonal antibody | Immune regulators   | Domestic       | Yes                  | Nimotuzumab in combination with radiotherapy is indicated for the treatment of stage III-IV nasopharyngeal carcinoma with positive EGFR gene expression                                                                                                    | NPC                           | Solid       | Yes       | Combination    | Yes        | 2008                        | not available        | not available             | Advanced-stage Treatment | 1-Line  | Phase II             | Randomized    | None         | 2 arms | ORR                   |
| 258 | Nimotuzumab  | Iv             | monoclonal antibody | Immune regulators   | Domestic       | Yes                  | Nimotuzumab in combination with gemcitabine is indicated for the treatment of K-Ras wild-type locally advanced or metastatic pancreatic cancer                                                                                                             | PC                            | Solid       | Yes       | Combination    | No         | 2023                        | Standard approval    | NCT00561990               | Advanced-stage Treatment | 2-Line  | Phase II/III a       | Randomized    | Double-blind | 2 arms | OS                    |
| 259 | Nimotuzumab  | Iv             | monoclonal antibody | Immune regulators   | Domestic       | Yes                  | Nimotuzumab in combination with concurrent chemoradiotherapy is indicated for the treatment of locally advanced head and neck squamous cell carcinoma                                                                                                      | SCCHN                         | Solid       | No        | Combination    | Yes        | 2024                        | Standard approval    | not available             | Advanced-stage Treatment | 1-Line  | Phase III            | Randomized    | None         | 2 arms | PFS                   |
| 260 | Niraparib    | Po             | small molecule      | Targeted agents     | Import         | No                   | Indicated for the maintenance treatment of adult patients with platinum-sensitive recurrent epithelial ovarian cancer, fallopian tube cancer, or primary peritoneal cancer, following platinum-based chemotherapy achieving a complete or partial response | OC&TC&PC                      | Solid       | No        | Combination    | Yes        | 2019                        | Special approval     | NCT01847274               | Advanced-stage Treatment | 2-Line  | Phase III            | Randomized    | Double-blind | 2 arms | PFS                   |
| 261 | Niraparib    | Po             | small molecule      | Targeted agents     | Import         | No                   | Indicated for the maintenance treatment of adult patients with advanced epithelial ovarian cancer, fallopian tube cancer, or primary peritoneal cancer who have achieved a complete or partial response after first-line platinum-based chemotherapy       | OC&TC&PC                      | Solid       | No        | Combination    | Yes        | 2020                        | Priority approval    | NCT02655016               | Advanced-stage Treatment | 2-Line  | Phase III            | Randomized    | Double-blind | 2 arms | PFS                   |
| 262 | Fluzoparib   | Po             | small molecule      | Targeted agents     | Domestic       | Yes                  | Indicated for the treatment of platinum-sensitive recurrent ovarian cancer, fallopian tube cancer, or primary peritoneal cancer in patients with germline BRCA mutations who have received at least second-line chemotherapy                               | OC&TC&PC                      | Solid       | Yes       | Combination    | Yes        | 2020                        | Special approval     | NCT03509636               | Advanced-stage Treatment | ≥3-Line | Phase Ib             | Nonrandomized | None         | 1 arm  | ORR                   |
| 263 | Fluzoparib   | Po             | small molecule      | Targeted agents     | Domestic       | Yes                  | Indicated for maintenance treatment of platinum-sensitive recurrent epithelial ovarian cancer, fallopian tube cancer, or primary peritoneal cancer in adult patients who have achieved a complete or partial response after platinum-based chemotherapy    | OC&TC&PC                      | Solid       | No        | Combination    | Yes        | 2021                        | Priority approval    | NCT03863860               | Advanced-stage Treatment | 2-Line  | Phase III            | Randomized    | Double-blind | 2 arms | PFS                   |
| 264 | Candonilimab | Iv             | monoclonal antibody | Targeted agents     | Domestic       | Yes                  | Indicated for the treatment of recurrent or metastatic cervical cancer in patients who have previously failed platinum-based chemotherapy                                                                                                                  | CC                            | Solid       | No        | Combination    | Yes        | 2022                        | Conditional approval | NCT04380805               | Advanced-stage Treatment | 2-Line  | Phase Ib/II          | Nonrandomized | None         | 1 arm  | ORR                   |
| 265 | Candonilimab | Iv             | monoclonal antibody | Targeted agents     | Domestic       | Yes                  | Candonilimab in combination with XELOX (oxaliplatin and capecitabine) is indicated for first-line treatment of unresectable locally advanced, recurrent, or metastatic gastric or gastroesophageal junction (G/GJ) adenocarcinoma                          | GC                            | Solid       | No        | Combination    | No         | 2024                        | Standard approval    | NCT05008783               | Advanced-stage Treatment | 1-Line  | Phase III            | Randomized    | Double-blind | 2 arms | OS                    |

**Table S4. Excluded Non-anticancer Indications and A List of Car-T cell Therapies**

| <b>Hematologic tumor drugs</b> |                           |
|--------------------------------|---------------------------|
| <b>No.</b>                     | <b>Drug Name</b>          |
| 1                              | Thalidomide               |
| 2                              | Equecabtagene Autoleucel  |
| 3                              | Axicabtagene Ciloleucel   |
| 4                              | Relmacabtagene Autoleucel |

Table S5. List of Excluded Novel Single-indication Anti-cancer Drugs for Indications and Clinical Trials

| No. | Drug No. | Generic name  | Indication No. | Year of indication approval | Indication                                                                                                                                                                                                                                                                                                       | Single/Multiple Indications | NCT                                 | Clinical trial phase | Allocation    | Masking       | Arms          |
|-----|----------|---------------|----------------|-----------------------------|------------------------------------------------------------------------------------------------------------------------------------------------------------------------------------------------------------------------------------------------------------------------------------------------------------------|-----------------------------|-------------------------------------|----------------------|---------------|---------------|---------------|
| 1   | 1        | Gefitinib     | 1              | 2004                        | For use in locally advanced or metastatic non-small cell lung cancer (NSCLC) with sensitive mutations in the epidermal growth factor receptor (EGFR) gene                                                                                                                                                        | Single                      | NCT00322452                         | Phase III            | Randomized    | None          | 2 arms        |
| 9   | 5        | Dacomitinib   | 1              | 2019                        | Monotherapy for first-line treatment of advanced NSCLC with EGFR exon 19 deletion or exon 21 L858R mutation                                                                                                                                                                                                      | Single                      | NCT01774721                         | Phase III            | Randomized    | None          | 2 arms        |
| 17  | 9        | Befoteritinib | 1              | 2023                        | For treating adults with advanced NSCLC harboring EGFR T790M mutation who have progressed on or after EGFR-TKI therapy                                                                                                                                                                                           | Single                      | NCT03861156                         | Phase II             | Nonrandomized | None          | 1 arm         |
| 20  | 11       | Alectinib     | 1              | 2018                        | For the treatment of patients with locally advanced or metastatic NSCLC who are ALK-positive                                                                                                                                                                                                                     | Single                      | NCT02075840                         | Phase III            | Randomized    | None          | 2 arms        |
| 25  | 14       | Brigatinib    | 1              | 2022                        | For the treatment of patients with locally advanced or metastatic NSCLC who are ALK-positive                                                                                                                                                                                                                     | Single                      | NCT02737501                         | Phase III            | Randomized    | None          | 2 arms        |
| 36  | 18       | Endostatin    | 1              | 2005                        | Combined with vinorelbine/cisplatin chemotherapy regimen for the treatment of newly diagnosed or relapsed stage III-IV NSCLC patients                                                                                                                                                                            | Single                      | Not available                       | Not available        | Not available | Not available | Not available |
| 52  | 23       | Savolitinib   | 1              | 2021                        | For adults with advanced metastatic NSCLC with MET exon 14 mutation who progressed or are intolerant to platinum-based chemotherapy                                                                                                                                                                              | Single                      | NCT02897479                         | Phase II             | Nonrandomized | None          | 1 arm         |
| 53  | 24       | Glumetinib    | 1              | 2023                        | For the treatment of locally advanced or metastatic NSCLC with MET exon 14 skipping mutation                                                                                                                                                                                                                     | Single                      | NCT04270591                         | Phase Ib/II          | Nonrandomized | None          | 1 arm         |
| 63  | 28       | Mobocertinib  | 1              | 2023                        | For adults with advanced NSCLC harboring EGFR exon 20 insertion mutation who progressed during or after platinum-based chemotherapy                                                                                                                                                                              | Single                      | NCT02716116                         | Phase I & II         | Nonrandomized | None          | 1 arm         |
| 151 | 41       | Adebrelimab   | 1              | 2023                        | Combined with carboplatin and etoposide for first-line treatment of patients with extensive-stage small cell lung cancer                                                                                                                                                                                         | Single                      | NCT03711305                         | Phase III            | Randomized    | Double-blind  | 2 arms        |
| 188 | 52       | Avapritinib   | 1              | 2021                        | For the treatment of adult patients with unresectable or metastatic GIST harboring PDGFRA exon 18 (including D842V) mutations                                                                                                                                                                                    | Single                      | NCT02508532                         | Phase I              | Nonrandomized | None          | 1 arm         |
| 189 | 53       | Ripretinib    | 1              | 2021                        | For the treatment of adult patients with advanced GIST who have received three or more tyrosine kinase inhibitors, including imatinib                                                                                                                                                                            | Single                      | NCT03353753                         | Phase III            | Randomized    | Double-blind  | 2 arms        |
| 190 | 54       | Surufatinib   | 1              | 2020                        | For the treatment of unresectable advanced or metastatic non-pancreatic G1/G2 non-functional neuroendocrine tumors                                                                                                                                                                                               | Single                      | NCT02588170                         | Phase III            | Randomized    | Double-blind  | 2 arms        |
| 194 | 56       | Fruquintinib  | 1              | 2018                        | Monotherapy for mCRC patients who have received chemotherapy and are unsuitable for anti-VEGF or anti-EGFR (RAS wild-type) therapies                                                                                                                                                                             | Single                      | NCT02314819                         | Phase III            | Randomized    | Double-blind  | 2 arms        |
| 195 | 57       | Envafolelimab | 1              | 2021                        | For the treatment of adult patients with unresectable or metastatic MSI-H/dMMR advanced solid tumors, including:<br><br>Advanced colorectal cancer that progressed after fluoropyrimidine, oxaliplatin, and irinotecan treatment;<br><br>Other advanced solid tumors that progressed with no alternative options | Single                      | NCT03667170                         | Phase II             | Nonrandomized | None          | 1 arm         |
| 196 | 58       | Larotrectinib | 1              | 2022                        | For adult and pediatric patients with solid tumors confirmed to have non-resistant NTRK fusions, who have locally advanced/metastatic disease or high surgical risk, and no satisfactory alternative treatment                                                                                                   | Single                      | NCT02122913/NCT02637687/NCT02576431 | Phase I/II           | Nonrandomized | None          | 1 arm         |
| 199 | 60       | Pemigatinib   | 1              | 2022                        | For adult patients with advanced cholangiocarcinoma who have received systemic therapy and tested positive for FGFR2 fusions/rearrangements                                                                                                                                                                      | Single                      | NCT02924376                         | Phase II             | Nonrandomized | None          | 1 arm         |
| 200 | 61       | Dasatinib     | 1              | 2011                        | For the treatment of adult patients with Ph+ CML in the chronic, accelerated, or blast phase who are resistant or intolerant to imatinib                                                                                                                                                                         | Single                      | NCT00123474                         | Phase III            | Randomized    | None          | ≥3 arms       |
| 206 | 64       | Flumatinib    | 1              | 2019                        | For the treatment of adult patients with Ph+ CML in the chronic phase                                                                                                                                                                                                                                            | Single                      | NCT02204644                         | Phase III            | Randomized    | None          | 2 arms        |
| 222 | 69       | Carfilzomib   | 1              | 2021                        | With dexamethasone for adults with relapsed/refractory multiple myeloma after two or more treatments                                                                                                                                                                                                             | Single                      | NCT03029234                         | Phase III            | Nonrandomized | None          | 1 arm         |
| 223 | 70       | Ixazomib      | 1              | 2018                        | With lenalidomide and dexamethasone for adults with multiple myeloma after at least one prior treatment                                                                                                                                                                                                          | Single                      | NCT01564537                         | Phase III            | Randomized    | Double-blind  | 2 arms        |
| 227 | 72       | Pomalidomide  | 1              | 2020                        | Pomalidomide + dexamethasone for adults with relapsed/refractory multiple myeloma after ≥2 treatments and progression within 60 days                                                                                                                                                                             | Single                      | NCT01311687                         | Phase III            | Randomized    | None          | 2 arms        |

| No. | Drug No. | Generic name          | Indication No. | Year of indication approval | Indication                                                                                                                                                                                                                             | Single/Multiple Indications | NCT           | Clinical trial phase | Allocation    | Masking      | Arms   |
|-----|----------|-----------------------|----------------|-----------------------------|----------------------------------------------------------------------------------------------------------------------------------------------------------------------------------------------------------------------------------------|-----------------------------|---------------|----------------------|---------------|--------------|--------|
| 231 | 74       | Selinexor             | 1              | 2021                        | With dexamethasone for adults with relapsed/refractory multiple myeloma resistant to proteasome inhibitor, immunomodulator, and anti-CD38 antibody                                                                                     | Single                      | NCT02336815   | Phase II             | Nonrandomized | None         | 1 arm  |
| 232 | 75       | Gilteritinib          | 1              | 2021                        | For adults with relapsed/refractory AML confirmed to have FLT3 mutation by validated testing                                                                                                                                           | Single                      | NCT02421939   | Phase III            | Randomized    | None         | 2 arms |
| 233 | 76       | Venetoclax            | 1              | 2020                        | With azacitidine for newly diagnosed AML adults ineligible for intensive induction chemotherapy due to comorbidities or age $\geq 75$                                                                                                  | Single                      | NCT02993523   | Phase III            | Randomized    | Double-blind | 2 arms |
| 234 | 77       | Ivosidenib            | 1              | 2022                        | For adults with relapsed/refractory AML with an IDH1 mutation                                                                                                                                                                          | Single                      | NCT02074839   | Phase II             | Nonrandomized | None         | 1 arm  |
| 244 | 81       | Ripertamab            | 1              | 2022                        | For newly diagnosed adults with CD20+ DLBCL and IPI 0-2, in combination with standard CHOP chemotherapy                                                                                                                                | Single                      | NCT02772822   | Phase III            | Randomized    | Single-blind | 2 arms |
| 245 | 82       | Zuberitamab           | 1              | 2023                        | For adults with CD20+ diffuse large B-cell lymphoma, in combination with standard CHOP chemotherapy                                                                                                                                    | Single                      | NCT03485118   | Phase III            | Randomized    | Double-blind | 2 arms |
| 246 | 83       | Obinutuzumab          | 1              | 2021                        | In combination with chemotherapy for newly diagnosed stage II with large tumors, stage III, or stage IV follicular lymphoma, followed by obinutuzumab maintenance after partial remission                                              | Single                      | NCT01332968   | Phase III            | Randomized    | None         | 2 arms |
| 252 | 86       | Inotuzumab Ozogamicin | 1              | 2021                        | For adults with relapsed/refractory precursor B-cell acute lymphoblastic leukemia                                                                                                                                                      | Single                      | NCT01564784   | Phase III            | Randomized    | None         | 2 arms |
| 255 | 88       | Linperlisib           | 1              | 2022                        | For adults with relapsed or refractory follicular lymphoma who have received at least two prior systemic therapies                                                                                                                     | Single                      | NCT04370405   | Phase II             | Nonrandomized | None         | 1 arm  |
| 256 | 89       | Duvelisib             | 1              | 2022                        | For adults with relapsed or refractory follicular lymphoma who have received at least two prior systemic therapies                                                                                                                     | Single                      | NCT01882803   | Phase II             | Nonrandomized | None         | 1 arm  |
| 257 | 90       | Ruxolitinib           | 1              | 2017                        | For adults with intermediate- or high-risk primary myelofibrosis (PMF), post-polycythemia vera myelofibrosis (PPV-MF), or post-essential thrombocythemia myelofibrosis (PET-MF), to treat disease-related splenomegaly or symptoms     | Single                      | NCT00952289   | Phase III            | Randomized    | Double-blind | 2 arms |
| 258 | 91       | Mogamulizumab         | 1              | 2022                        | Indicated for relapsed/refractory Sézary syndrome or advanced (Stage III/IV) mycosis fungoides in adults who have received systemic therapy                                                                                            | Single                      | NCT01728805   | Phase III            | Randomized    | None         | 2 arms |
| 259 | 92       | Siltuximab            | 1              | 2021                        | Indicated for the treatment of adult patients with multicentric Castleman disease (MCD) who are human immunodeficiency virus (HIV)-negative and human herpesvirus-8 (HHV-8)-negative                                                   | Single                      | NCT01024036   | Phase II             | Randomized    | Double-blind | 2 arms |
| 260 | 93       | Pazopanib             | 1              | 2017                        | For first-line and post-cytokine therapy treatment of advanced renal cell carcinoma (RCC)                                                                                                                                              | Single                      | NCT00334282   | Phase III            | Randomized    | Double-blind | 2 arms |
| 261 | 94       | Axitinib              | 1              | 2015                        | For adult patients with advanced renal cell carcinoma (RCC) who have progressed following prior treatment with one tyrosine kinase inhibitor (TKI) or cytokine therapy                                                                 | Single                      | NCT00678392   | Phase III            | Randomized    | None         | 2 arms |
| 271 | 99       | Rezvilutamide         | 1              | 2022                        | Indicated for the treatment of patients with metastatic hormone-sensitive prostate cancer (mHSPC) with high tumor burden                                                                                                               | Single                      | NCT03520478   | Phase III            | Randomized    | None         | 2 arms |
| 283 | 104      | Inetetamab            | 1              | 2020                        | Indicated for the treatment of HER2-positive metastatic breast cancer (MBC) in combination with vinorelbine in patients who have previously received one or more prior chemotherapy regimens                                           | Single                      | Not Available | Phase III            | Randomized    | None         | 2 arms |
| 284 | 105      | Lapatinib             | 1              | 2013                        | For HER2-overexpressing advanced or metastatic breast cancer (MBC), in combination with capecitabine, previously treated with anthracyclines, taxanes, and trastuzumab                                                                 | Single                      | NCT00078572   | Phase III            | Randomized    | None         | 2 arms |
| 288 | 107      | Neratinib             | 1              | 2020                        | For adult patients with HER2-positive early breast cancer, following enhanced adjuvant therapy after trastuzumab-based treatment                                                                                                       | Single                      | NCT00878709   | Phase III            | Randomized    | Double-blind | 2 arms |
| 289 | 108      | Palbociclib           | 1              | 2018                        | For HR+/HER2- locally advanced or metastatic breast cancer (MBC) in postmenopausal women, in combination with an aromatase inhibitor (AI) as first-line endocrine therapy                                                              | Single                      | NCT01740427   | Phase III            | Randomized    | Double-blind | 2 arms |
| 297 | 112      | Sacituzumab Govitecan | 1              | 2022                        | Indicated for the treatment of adult patients with unresectable, locally advanced or metastatic triple-negative breast cancer (TNBC) who have received at least two prior systemic therapies, with at least one for metastatic disease | Single                      | NCT01631552   | Phase II             | Nonrandomized | None         | 1 arm  |
| 298 | 113      | Vemurafenib           | 1              | 2017                        | Indicated for the treatment of unresectable or metastatic melanoma with BRAF V600 mutation-positive status                                                                                                                             | Single                      | NCT01006980   | Phase III            | Randomized    | None         | 2 arms |
| 299 | 114      | Sonidegib             | 1              | 2021                        | Indicated for the treatment of adult patients with locally advanced basal cell carcinoma (BCC) who are not candidates for surgery or radiation, or who have recurrent disease following surgery or radiation therapy                   | Single                      | NCT01327053   | Phase II             | Randomized    | Double-blind | 2 arms |
| 309 | 119      | Pamiparib             | 1              | 2021                        | Indicated for the treatment of patients with relapsed, advanced ovarian cancer, fallopian tube cancer, or primary peritoneal cancer harboring a germline BRCA mutation, who have received two or more prior lines of chemotherapy      | Single                      | NCT03333915   | Phase I/II           | Nonrandomized | None         | 1 arm  |
